# Supplementary material for: Development of Genomic Resources for a thraustochytrid Pathogen and Investigation of Temperature Influences on Gene Expression
Source: PLoS One. 2013 Sep 17;8(9):e74196. doi: 10.1371/journal.pone.0074196 (PMC3775781; doi:10.1371/journal.pone.0074196)
Supplement: Table S6 — Gene enrichment analysis information on QPX10 and QPX21 libraries. 26 biological processes were enriched that corresponded to 163 QPX transcriptome contigs in the QPX10 library; and 60 biological processes were enriched that corresponded to 175 QPX transcriptome contigs in the QPX21 library. Datasheets are provided separately for each library. Specific data in the Table include Gene Ontology (GO) category, GO Term (number and description), Enrichment p-value, Corresponding QPX Contig ID, SwissProt ID of top BLAST hit, Gene Description of top BLAST hit, and corresponding e-value associated with BLAST search. (XLSX) [file pone.0074196.s008.xlsx]

## Sheet: QPX10_UPreg
Table S6: Gene enrichment analysis information on QPX10 and QPX21 libraries
Gene Ontology (GO) Category	GO Term	Enrichment p-value	Corresponding QPX Contig ID	Blast SwissProt ID	Blast Description	Blast e-value
GOTERM_BP_FAT	GO:0006412~translation	3.72e-14	QPX_transcriptome_v1_Contig_2230	Q6PQD5	Serine-protein kinase ATM	2e-58
GOTERM_BP_FAT	GO:0006412~translation	3.72e-14	QPX_transcriptome_v1_Contig_778	Q19713	Phenylalanine--tRNA ligase beta chain	5e-150
GOTERM_BP_FAT	GO:0006412~translation	3.72e-14	QPX_transcriptome_v1_Contig_413	Q6BLK0	60S ribosomal protein L44	8e-40
GOTERM_BP_FAT	GO:0006412~translation	3.72e-14	QPX_transcriptome_v1_Contig_1151	O42699	60S ribosomal protein L19-B	4e-60
GOTERM_BP_FAT	GO:0006412~translation	3.72e-14	QPX_transcriptome_v1_Contig_4483	A5GIT6	30S ribosomal protein S17	8e-16
GOTERM_BP_FAT	GO:0006412~translation	3.72e-14	QPX_transcriptome_v1_Contig_353	Q9FLF0	40S ribosomal protein S9-2	6e-79
GOTERM_BP_FAT	GO:0006412~translation	3.72e-14	QPX_transcriptome_v1_Contig_3881	B4U6R6	30S ribosomal protein S15	3e-11
GOTERM_BP_FAT	GO:0006412~translation	3.72e-14	QPX_transcriptome_v1_Contig_3075	P53163	54S ribosomal protein L12, mitochondrial	2e-17
GOTERM_BP_FAT	GO:0006412~translation	3.72e-14	QPX_transcriptome_v1_Contig_202	O22860	60S ribosomal protein L38	1e-28
GOTERM_BP_FAT	GO:0006412~translation	3.72e-14	QPX_transcriptome_v1_Contig_6907	Q1J0N7	50S ribosomal protein L33	3e-14
GOTERM_BP_FAT	GO:0006412~translation	3.72e-14	QPX_transcriptome_v1_Contig_1079	O43940	60S acidic ribosomal protein P2	4e-12
GOTERM_BP_FAT	GO:0006412~translation	3.72e-14	QPX_transcriptome_v1_Contig_248	O42706	60S ribosomal protein L21-B	3e-53
GOTERM_BP_FAT	GO:0006412~translation	3.72e-14	QPX_transcriptome_v1_Contig_1742	P24922	Eukaryotic translation initiation factor 5A-2	3e-41
GOTERM_BP_FAT	GO:0006412~translation	3.72e-14	QPX_transcriptome_v1_Contig_3305	Q1QN25	50S ribosomal protein L22	7e-13
GOTERM_BP_FAT	GO:0006412~translation	3.72e-14	QPX_transcriptome_v1_Contig_3022	A5UQW9	30S ribosomal protein S18 1	2e-09
GOTERM_BP_FAT	GO:0006412~translation	3.72e-14	QPX_transcriptome_v1_Contig_554	P51414	60S ribosomal protein L26-1	2e-36
GOTERM_BP_FAT	GO:0006412~translation	3.72e-14	QPX_transcriptome_v1_Contig_1843	B1ZGB4	50S ribosomal protein L20	2e-24
GOTERM_BP_FAT	GO:0006412~translation	3.72e-14	QPX_transcriptome_v1_Contig_35	P31009	40S ribosomal protein S2	4e-104
GOTERM_BP_FAT	GO:0006412~translation	3.72e-14	QPX_transcriptome_v1_Contig_501	P17078	60S ribosomal protein L35	1e-13
GOTERM_BP_FAT	GO:0006412~translation	3.72e-14	QPX_transcriptome_v1_Contig_1383	Q3SZ12	Probable ribosome biogenesis protein RLP24	5e-59
GOTERM_BP_FAT	GO:0006412~translation	3.72e-14	QPX_transcriptome_v1_Contig_4422	A1WY49	50S ribosomal protein L27	4e-23
GOTERM_BP_FAT	GO:0006412~translation	3.72e-14	QPX_transcriptome_v1_Contig_1159	P21772	40S ribosomal protein S26E	4e-17
GOTERM_BP_FAT	GO:0006412~translation	3.72e-14	QPX_transcriptome_v1_Contig_2111	Q9SS17	40S ribosomal protein S24-1	1e-45
GOTERM_BP_FAT	GO:0006412~translation	3.72e-14	QPX_transcriptome_v1_Contig_116	P23403	40S ribosomal protein S20	3e-38
GOTERM_BP_FAT	GO:0006412~translation	3.72e-14	QPX_transcriptome_v1_Contig_1087	O42867	60S ribosomal protein L23	1e-79
GOTERM_BP_FAT	GO:0006412~translation	3.72e-14	QPX_transcriptome_v1_Contig_302	A0LIL8	50S ribosomal protein L17	2e-34
GOTERM_BP_FAT	GO:0006412~translation	3.72e-14	QPX_transcriptome_v1_Contig_1788	Q9VXX8	Probable 60S ribosomal protein L37-A	2e-37
GOTERM_BP_FAT	GO:0006412~translation	3.72e-14	QPX_transcriptome_v1_Contig_345	P62302	40S ribosomal protein S13	7e-72
GOTERM_BP_FAT	GO:0006412~translation	3.72e-14	QPX_transcriptome_v1_Contig_1313	Q38884	Eukaryotic translation initiation factor 3 subunit I	2e-104
GOTERM_BP_FAT	GO:0006412~translation	3.72e-14	QPX_transcriptome_v1_Contig_493	Q6QAT0	60S ribosomal protein L32	3e-35
GOTERM_BP_FAT	GO:0006412~translation	3.72e-14	QPX_transcriptome_v1_Contig_1987	Q962T2	60S ribosomal protein L28	1e-06
GOTERM_BP_FAT	GO:0006412~translation	3.72e-14	QPX_transcriptome_v1_Contig_261	O80929	60S ribosomal protein L36-1	8e-13
GOTERM_BP_FAT	GO:0006412~translation	3.72e-14	QPX_transcriptome_v1_Contig_1289	Q6QAT1	40S ribosomal protein S28	3e-18
GOTERM_BP_FAT	GO:0006412~translation	3.72e-14	QPX_transcriptome_v1_Contig_411	O60739	Eukaryotic translation initiation factor 1b	5e-25
GOTERM_BP_FAT	GO:0006412~translation	3.72e-14	QPX_transcriptome_v1_Contig_771	P02434	60S ribosomal protein L35a	2e-37
GOTERM_BP_FAT	GO:0006412~translation	3.72e-14	QPX_transcriptome_v1_Contig_1249	P62084	40S ribosomal protein S7	3e-57
GOTERM_BP_FAT	GO:0006412~translation	3.72e-14	QPX_transcriptome_v1_Contig_797	O65059	40S ribosomal protein S15	9e-57
GOTERM_BP_FAT	GO:0006412~translation	3.72e-14	QPX_transcriptome_v1_Contig_1009	Q0DK10	60S ribosomal protein L11	1e-84
GOTERM_BP_FAT	GO:0006412~translation	3.72e-14	QPX_transcriptome_v1_Contig_1600	P62244	40S ribosomal protein S15a	1e-63
GOTERM_BP_FAT	GO:0006412~translation	3.72e-14	QPX_transcriptome_v1_Contig_1955	Q8N983	39S ribosomal protein L43, mitochondrial	8e-19
GOTERM_BP_FAT	GO:0006412~translation	3.72e-14	QPX_transcriptome_v1_Contig_612	Q9M573	60S ribosomal protein L31	2e-42
GOTERM_BP_FAT	GO:0006412~translation	3.72e-14	QPX_transcriptome_v1_Contig_2095	B4LN42	Eukaryotic translation initiation factor 3 subunit J	4e-07
GOTERM_BP_FAT	GO:0006412~translation	3.72e-14	QPX_transcriptome_v1_Contig_17	P52808	60S ribosomal protein L30-1	4e-48
GOTERM_BP_FAT	GO:0006412~translation	3.72e-14	QPX_transcriptome_v1_Contig_1737	Q9P975	Eukaryotic translation initiation factor 4E	5e-16
GOTERM_BP_FAT	GO:0006412~translation	3.72e-14	QPX_transcriptome_v1_Contig_419	Q1JPH6	Eukaryotic translation initiation factor 4H	1e-20
GOTERM_BP_FAT	GO:0006412~translation	3.72e-14	QPX_transcriptome_v1_Contig_424	A5PK63	40S ribosomal protein S17	3e-47
GOTERM_BP_FAT	GO:0006412~translation	3.72e-14	QPX_transcriptome_v1_Contig_510	Q58DW3	60S ribosomal protein L29	1e-15
GOTERM_BP_FAT	GO:0006412~translation	3.72e-14	QPX_transcriptome_v1_Contig_178	P49637	60S ribosomal protein L27a-3	7e-68
GOTERM_BP_FAT	GO:0006412~translation	3.72e-14	QPX_transcriptome_v1_Contig_1044	P55844	Probable 60S ribosomal protein L14	7e-30
GOTERM_BP_FAT	GO:0006412~translation	3.72e-14	QPX_transcriptome_v1_Contig_89	P40525	60S ribosomal protein L34-B	4e-41
GOTERM_BP_FAT	GO:0006412~translation	3.72e-14	QPX_transcriptome_v1_Contig_113	Q86FP7	40S ribosomal protein S23	4e-72
GOTERM_BP_FAT	GO:0006412~translation	3.72e-14	QPX_transcriptome_v1_Contig_56	P60039	60S ribosomal protein L7-3	2e-73
GOTERM_BP_FAT	GO:0006412~translation	3.72e-14	QPX_transcriptome_v1_Contig_338	P42677	40S ribosomal protein S27	2e-34
GOTERM_BP_FAT	GO:0006412~translation	3.72e-14	QPX_transcriptome_v1_Contig_429	Q6CTH3	Translationally-controlled tumor protein homolog	1e-06
GOTERM_BP_FAT	GO:0006412~translation	3.72e-14	QPX_transcriptome_v1_Contig_3205	Q8L9A0	50S ribosomal protein L21, mitochondrial	8e-12
GOTERM_BP_FAT	GO:0006457~protein folding	0.000404	QPX_transcriptome_v1_Contig_3647	P0A265	Peptidyl-prolyl cis-trans isomerase C	2e-26
GOTERM_BP_FAT	GO:0006457~protein folding	0.000404	QPX_transcriptome_v1_Contig_7275	A4FV72	Peptidyl-prolyl cis-trans isomerase E	9e-11
GOTERM_BP_FAT	GO:0006457~protein folding	0.000404	QPX_transcriptome_v1_Contig_6429	Q6CGG3	FK506-binding protein 2	6e-30
GOTERM_BP_FAT	GO:0006457~protein folding	0.000404	QPX_transcriptome_v1_Contig_4637	Q9UXR9	Chaperone protein DnaJ	4e-16
GOTERM_BP_FAT	GO:0006457~protein folding	0.000404	QPX_transcriptome_v1_Contig_140	Q39613	Peptidyl-prolyl cis-trans isomerase	1e-80
GOTERM_BP_FAT	GO:0006457~protein folding	0.000404	QPX_transcriptome_v1_Contig_1895	Q9P7H3	Prohibitin-1	5e-19
GOTERM_BP_FAT	GO:0006457~protein folding	0.000404	QPX_transcriptome_v1_Contig_275	B3CP03	Chaperone protein DnaJ	3e-19
GOTERM_BP_FAT	GO:0006457~protein folding	0.000404	QPX_transcriptome_v1_Contig_2774	Q9LDC0	42 kDa peptidyl-prolyl isomerase	3e-21
GOTERM_BP_FAT	GO:0006457~protein folding	0.000404	QPX_transcriptome_v1_Contig_8	P42824	DnaJ protein homolog 2	5e-80
GOTERM_BP_FAT	GO:0006457~protein folding	0.000404	QPX_transcriptome_v1_Contig_32	Q9D832	DnaJ homolog subfamily B member 4	3e-70
GOTERM_BP_FAT	GO:0006457~protein folding	0.000404	QPX_transcriptome_v1_Contig_3153	P91791	Peptidyl-prolyl cis-trans isomerase	1e-65
GOTERM_BP_FAT	GO:0006457~protein folding	0.000404	QPX_transcriptome_v1_Contig_2996	Q2TBR6	Prefoldin subunit 4	5e-17
GOTERM_BP_FAT	GO:0006457~protein folding	0.000404	QPX_transcriptome_v1_Contig_1017	P15705	Heat shock protein STI1	1e-13
GOTERM_BP_FAT	GO:0006457~protein folding	0.000404	QPX_transcriptome_v1_Contig_4064	Q7M9T3	Chaperone protein DnaJ	2e-07
GOTERM_BP_FAT	GO:0006457~protein folding	0.000404	QPX_transcriptome_v1_Contig_1093	Q58DR2	DnaJ homolog subfamily B member 12	5e-39
GOTERM_BP_FAT	GO:0006457~protein folding	0.000404	QPX_transcriptome_v1_Contig_2409	Q13526	Peptidyl-prolyl cis-trans isomerase NIMA-interacting 1	8e-42
GOTERM_BP_FAT	GO:0006457~protein folding	0.000404	QPX_transcriptome_v1_Contig_1730	Q0III6	DnaJ homolog subfamily B member 6	5e-26
GOTERM_BP_FAT	GO:0006457~protein folding	0.000404	QPX_transcriptome_v1_Contig_931	P53605	Outer membrane protein MIP	4e-10
GOTERM_BP_FAT	GO:0009853~photorespiration	0.00162322	QPX_transcriptome_v1_Contig_2410	Q945M1	NADH dehydrogenase [ubiquinone] 1 beta subcomplex subunit 9	2e-12
GOTERM_BP_FAT	GO:0009853~photorespiration	0.00162322	QPX_transcriptome_v1_Contig_6351	Q9SYU4	Peroxisome biogenesis factor 10	3e-41
GOTERM_BP_FAT	GO:0009853~photorespiration	0.00162322	QPX_transcriptome_v1_Contig_3571	Q9FMV1	Uncharacterized protein At5g63510, mitochondrial	2e-21
GOTERM_BP_FAT	GO:0009853~photorespiration	0.00162322	QPX_transcriptome_v1_Contig_1498	Q94C12	NADH dehydrogenase [ubiquinone] 1 beta subcomplex subunit 10-B	6e-08
GOTERM_BP_FAT	GO:0009853~photorespiration	0.00162322	QPX_transcriptome_v1_Contig_2588	Q8RWA7	NADH dehydrogenase [ubiquinone] 1 alpha subcomplex subunit 13-A	2e-20
GOTERM_BP_FAT	GO:0008104~protein localization	0.00414619	QPX_transcriptome_v1_Contig_1494	Q66IJ0	Nucleoporin NUP53	3e-14
GOTERM_BP_FAT	GO:0008104~protein localization	0.00414619	QPX_transcriptome_v1_Contig_2394	Q6A078	Centrosomal protein of 290 kDa	5e-07
GOTERM_BP_FAT	GO:0008104~protein localization	0.00414619	QPX_transcriptome_v1_Contig_3083	Q8LEZ8	AP-1 complex subunit sigma-1	6e-61
GOTERM_BP_FAT	GO:0008104~protein localization	0.00414619	QPX_transcriptome_v1_Contig_2375	Q7S6S4	Mitochondrial import inner membrane translocase subunit tim-16	3e-10
GOTERM_BP_FAT	GO:0008104~protein localization	0.00414619	QPX_transcriptome_v1_Contig_2353	Q9SFU0	Protein transport protein Sec24-like At3g07100	5e-169
GOTERM_BP_FAT	GO:0008104~protein localization	0.00414619	QPX_transcriptome_v1_Contig_667	Q39572	Ras-related protein YPTC6	2e-43
GOTERM_BP_FAT	GO:0008104~protein localization	0.00414619	QPX_transcriptome_v1_Contig_185	Q9CQV7	Mitochondrial import inner membrane translocase subunit TIM14	3e-21
GOTERM_BP_FAT	GO:0008104~protein localization	0.00414619	QPX_transcriptome_v1_Contig_3656	Q7SXP0	Vesicle-trafficking protein SEC22b-B	2e-47
GOTERM_BP_FAT	GO:0008104~protein localization	0.00414619	QPX_transcriptome_v1_Contig_1175	Q3SZV6	Mitochondrial import inner membrane translocase subunit Tim21	3e-15
GOTERM_BP_FAT	GO:0008104~protein localization	0.00414619	QPX_transcriptome_v1_Contig_2855	Q0IIG7	Ras-related protein Rab-5A	4e-41
GOTERM_BP_FAT	GO:0008104~protein localization	0.00414619	QPX_transcriptome_v1_Contig_1633	P50526	Serine/threonine-protein kinase ssp1	2e-34
GOTERM_BP_FAT	GO:0008104~protein localization	0.00414619	QPX_transcriptome_v1_Contig_6351	Q9SYU4	Peroxisome biogenesis factor 10	3e-41
GOTERM_BP_FAT	GO:0008104~protein localization	0.00414619	QPX_transcriptome_v1_Contig_3156	Q9XGX7	Mitochondrial import inner membrane translocase subunit Tim9	2e-12
GOTERM_BP_FAT	GO:0008104~protein localization	0.00414619	QPX_transcriptome_v1_Contig_3496	P29478	Signal recognition particle subunit SEC65	9e-10
GOTERM_BP_FAT	GO:0008104~protein localization	0.00414619	QPX_transcriptome_v1_Contig_5038	Q9CZE3	Ras-related protein Rab-32	2e-58
GOTERM_BP_FAT	GO:0008104~protein localization	0.00414619	QPX_transcriptome_v1_Contig_115	Q4FZV2	Vesicle transport protein SFT2B	3e-27
GOTERM_BP_FAT	GO:0008104~protein localization	0.00414619	QPX_transcriptome_v1_Contig_619	Q2KIU0	Vesicle transport through interaction with t-SNAREs homolog 1B	4e-06
GOTERM_BP_FAT	GO:0008104~protein localization	0.00414619	QPX_transcriptome_v1_Contig_496	P32897	Mitochondrial import inner membrane translocase subunit TIM23	6e-15
GOTERM_BP_FAT	GO:0008104~protein localization	0.00414619	QPX_transcriptome_v1_Contig_5436	Q9VCA8	Ankyrin repeat and KH domain-containing protein mask	1e-26
GOTERM_BP_FAT	GO:0008104~protein localization	0.00414619	QPX_transcriptome_v1_Contig_5964	Q63584	Transmembrane emp24 domain-containing protein 10	3e-30
GOTERM_BP_FAT	GO:0008104~protein localization	0.00414619	QPX_transcriptome_v1_Contig_4066	Q6CC82	Nuclear transport factor 2	1e-14
GOTERM_BP_FAT	GO:0008104~protein localization	0.00414619	QPX_transcriptome_v1_Contig_2253	Q7SZB5	Charged multivesicular body protein 1b	2e-54
GOTERM_BP_FAT	GO:0008104~protein localization	0.00414619	QPX_transcriptome_v1_Contig_269	Q6GQ52	Mitochondrial import inner membrane translocase subunit Tim10-B	3e-14
GOTERM_BP_FAT	GO:0008104~protein localization	0.00414619	QPX_transcriptome_v1_Contig_479	Q9H2K2	Tankyrase-2	2e-19
GOTERM_BP_FAT	GO:0008104~protein localization	0.00414619	QPX_transcriptome_v1_Contig_1291	Q940S5	Coatomer subunit zeta-1	2e-38
GOTERM_BP_FAT	GO:0008104~protein localization	0.00414619	QPX_transcriptome_v1_Contig_158	Q01474	GTP-binding protein SAR1B	1e-75
GOTERM_BP_FAT	GO:0008104~protein localization	0.00414619	QPX_transcriptome_v1_Contig_2930	Q9CQS8	Protein transport protein Sec61 subunit beta	2e-11
GOTERM_BP_FAT	GO:0008104~protein localization	0.00414619	QPX_transcriptome_v1_Contig_3389	Q3ZBS8	Mitochondrial import inner membrane translocase subunit Tim8 A	2e-13
GOTERM_BP_FAT	GO:0008104~protein localization	0.00414619	QPX_transcriptome_v1_Contig_3503	P36862	GTP-binding protein yptV3	2e-62
GOTERM_BP_FAT	GO:0008104~protein localization	0.00414619	QPX_transcriptome_v1_Contig_1929	Q58DS9	Ras-related protein Rab-5C	4e-68
GOTERM_BP_FAT	GO:0008104~protein localization	0.00414619	QPX_transcriptome_v1_Contig_3217	P59235	Nucleoporin Nup43	2e-07
GOTERM_BP_FAT	GO:0008104~protein localization	0.00414619	QPX_transcriptome_v1_Contig_8347	Q9STT2	Vacuolar protein sorting-associated protein 29	5e-73
GOTERM_BP_FAT	GO:0008104~protein localization	0.00414619	QPX_transcriptome_v1_Contig_512	Q0WTY4	Vacuolar protein sorting-associated protein 2 homolog 2	2e-27
GOTERM_BP_FAT	GO:0008104~protein localization	0.00414619	QPX_transcriptome_v1_Contig_533	Q6C8M8	Sterol 3-beta-glucosyltransferase	7e-81
GOTERM_BP_FAT	GO:0008104~protein localization	0.00414619	QPX_transcriptome_v1_Contig_651	Q9LFT9	Ras-related protein RABH1e	4e-90
GOTERM_BP_FAT	GO:0008104~protein localization	0.00414619	QPX_transcriptome_v1_Contig_7913	O04421	Signal recognition particle 14 kDa protein	7e-10
GOTERM_BP_FAT	GO:0008104~protein localization	0.00414619	QPX_transcriptome_v1_Contig_1775	A7S6Y0	Protein SYS1 homolog	1e-35
GOTERM_BP_FAT	GO:0008104~protein localization	0.00414619	QPX_transcriptome_v1_Contig_478	Q9MAS5	Putative vesicle-associated membrane protein 726	4e-06
GOTERM_BP_FAT	GO:0008104~protein localization	0.00414619	QPX_transcriptome_v1_Contig_4590	Q5BCH0	Ubiquitin-like protein ATG12	1e-07
GOTERM_BP_FAT	GO:0009408~response to heat	0.00507849	QPX_transcriptome_v1_Contig_4637	Q9UXR9	Chaperone protein DnaJ	4e-16
GOTERM_BP_FAT	GO:0009408~response to heat	0.00507849	QPX_transcriptome_v1_Contig_4064	Q7M9T3	Chaperone protein DnaJ	2e-07
GOTERM_BP_FAT	GO:0009408~response to heat	0.00507849	QPX_transcriptome_v1_Contig_5646	Q9FIJ0	Respiratory burst oxidase homolog protein D	3e-51
GOTERM_BP_FAT	GO:0009408~response to heat	0.00507849	QPX_transcriptome_v1_Contig_2749	Q04432	Probable chaperone protein HSP31	4e-26
GOTERM_BP_FAT	GO:0009408~response to heat	0.00507849	QPX_transcriptome_v1_Contig_275	B3CP03	Chaperone protein DnaJ	3e-19
GOTERM_BP_FAT	GO:0009408~response to heat	0.00507849	QPX_transcriptome_v1_Contig_3581	Q9SGW3	26S proteasome non-ATPase regulatory subunit RPN12A	2e-43
GOTERM_BP_FAT	GO:0009408~response to heat	0.00507849	QPX_transcriptome_v1_Contig_6	Q943E7	16.9 kDa class I heat shock protein 3	2e-10
GOTERM_BP_FAT	GO:0009408~response to heat	0.00507849	QPX_transcriptome_v1_Contig_110	Q84Q72	18.1 kDa class I heat shock protein	6e-19
GOTERM_BP_FAT	GO:0009408~response to heat	0.00507849	QPX_transcriptome_v1_Contig_101	P13853	17.6 kDa class I heat shock protein 3	6e-09
GOTERM_BP_FAT	GO:0009408~response to heat	0.00507849	QPX_transcriptome_v1_Contig_186	P13853	17.6 kDa class I heat shock protein 3	2e-06
GOTERM_BP_FAT	GO:0015031~protein transport	0.00532019	QPX_transcriptome_v1_Contig_1494	Q66IJ0	Nucleoporin NUP53	3e-14
GOTERM_BP_FAT	GO:0015031~protein transport	0.00532019	QPX_transcriptome_v1_Contig_2394	Q6A078	Centrosomal protein of 290 kDa	5e-07
GOTERM_BP_FAT	GO:0015031~protein transport	0.00532019	QPX_transcriptome_v1_Contig_3083	Q8LEZ8	AP-1 complex subunit sigma-1	6e-61
GOTERM_BP_FAT	GO:0015031~protein transport	0.00532019	QPX_transcriptome_v1_Contig_2375	Q7S6S4	Mitochondrial import inner membrane translocase subunit tim-16	3e-10
GOTERM_BP_FAT	GO:0015031~protein transport	0.00532019	QPX_transcriptome_v1_Contig_2353	Q9SFU0	Protein transport protein Sec24-like At3g07100	5e-169
GOTERM_BP_FAT	GO:0015031~protein transport	0.00532019	QPX_transcriptome_v1_Contig_667	Q39572	Ras-related protein YPTC6	2e-43
GOTERM_BP_FAT	GO:0015031~protein transport	0.00532019	QPX_transcriptome_v1_Contig_185	Q9CQV7	Mitochondrial import inner membrane translocase subunit TIM14	3e-21
GOTERM_BP_FAT	GO:0015031~protein transport	0.00532019	QPX_transcriptome_v1_Contig_3656	Q7SXP0	Vesicle-trafficking protein SEC22b-B	2e-47
GOTERM_BP_FAT	GO:0015031~protein transport	0.00532019	QPX_transcriptome_v1_Contig_1175	Q3SZV6	Mitochondrial import inner membrane translocase subunit Tim21	3e-15
GOTERM_BP_FAT	GO:0015031~protein transport	0.00532019	QPX_transcriptome_v1_Contig_2855	Q0IIG7	Ras-related protein Rab-5A	4e-41
GOTERM_BP_FAT	GO:0015031~protein transport	0.00532019	QPX_transcriptome_v1_Contig_6351	Q9SYU4	Peroxisome biogenesis factor 10	3e-41
GOTERM_BP_FAT	GO:0015031~protein transport	0.00532019	QPX_transcriptome_v1_Contig_3496	P29478	Signal recognition particle subunit SEC65	9e-10
GOTERM_BP_FAT	GO:0015031~protein transport	0.00532019	QPX_transcriptome_v1_Contig_3156	Q9XGX7	Mitochondrial import inner membrane translocase subunit Tim9	2e-12
GOTERM_BP_FAT	GO:0015031~protein transport	0.00532019	QPX_transcriptome_v1_Contig_5038	Q9CZE3	Ras-related protein Rab-32	2e-58
GOTERM_BP_FAT	GO:0015031~protein transport	0.00532019	QPX_transcriptome_v1_Contig_115	Q4FZV2	Vesicle transport protein SFT2B	3e-27
GOTERM_BP_FAT	GO:0015031~protein transport	0.00532019	QPX_transcriptome_v1_Contig_619	Q2KIU0	Vesicle transport through interaction with t-SNAREs homolog 1B	4e-06
GOTERM_BP_FAT	GO:0015031~protein transport	0.00532019	QPX_transcriptome_v1_Contig_496	P32897	Mitochondrial import inner membrane translocase subunit TIM23	6e-15
GOTERM_BP_FAT	GO:0015031~protein transport	0.00532019	QPX_transcriptome_v1_Contig_5964	Q63584	Transmembrane emp24 domain-containing protein 10	3e-30
GOTERM_BP_FAT	GO:0015031~protein transport	0.00532019	QPX_transcriptome_v1_Contig_2253	Q7SZB5	Charged multivesicular body protein 1b	2e-54
GOTERM_BP_FAT	GO:0015031~protein transport	0.00532019	QPX_transcriptome_v1_Contig_4066	Q6CC82	Nuclear transport factor 2	1e-14
GOTERM_BP_FAT	GO:0015031~protein transport	0.00532019	QPX_transcriptome_v1_Contig_269	Q6GQ52	Mitochondrial import inner membrane translocase subunit Tim10-B	3e-14
GOTERM_BP_FAT	GO:0015031~protein transport	0.00532019	QPX_transcriptome_v1_Contig_1291	Q940S5	Coatomer subunit zeta-1	2e-38
GOTERM_BP_FAT	GO:0015031~protein transport	0.00532019	QPX_transcriptome_v1_Contig_158	Q01474	GTP-binding protein SAR1B	1e-75
GOTERM_BP_FAT	GO:0015031~protein transport	0.00532019	QPX_transcriptome_v1_Contig_2930	Q9CQS8	Protein transport protein Sec61 subunit beta	2e-11
GOTERM_BP_FAT	GO:0015031~protein transport	0.00532019	QPX_transcriptome_v1_Contig_3389	Q3ZBS8	Mitochondrial import inner membrane translocase subunit Tim8 A	2e-13
GOTERM_BP_FAT	GO:0015031~protein transport	0.00532019	QPX_transcriptome_v1_Contig_3503	P36862	GTP-binding protein yptV3	2e-62
GOTERM_BP_FAT	GO:0015031~protein transport	0.00532019	QPX_transcriptome_v1_Contig_1929	Q58DS9	Ras-related protein Rab-5C	4e-68
GOTERM_BP_FAT	GO:0015031~protein transport	0.00532019	QPX_transcriptome_v1_Contig_3217	P59235	Nucleoporin Nup43	2e-07
GOTERM_BP_FAT	GO:0015031~protein transport	0.00532019	QPX_transcriptome_v1_Contig_8347	Q9STT2	Vacuolar protein sorting-associated protein 29	5e-73
GOTERM_BP_FAT	GO:0015031~protein transport	0.00532019	QPX_transcriptome_v1_Contig_533	Q6C8M8	Sterol 3-beta-glucosyltransferase	7e-81
GOTERM_BP_FAT	GO:0015031~protein transport	0.00532019	QPX_transcriptome_v1_Contig_512	Q0WTY4	Vacuolar protein sorting-associated protein 2 homolog 2	2e-27
GOTERM_BP_FAT	GO:0015031~protein transport	0.00532019	QPX_transcriptome_v1_Contig_651	Q9LFT9	Ras-related protein RABH1e	4e-90
GOTERM_BP_FAT	GO:0015031~protein transport	0.00532019	QPX_transcriptome_v1_Contig_7913	O04421	Signal recognition particle 14 kDa protein	7e-10
GOTERM_BP_FAT	GO:0015031~protein transport	0.00532019	QPX_transcriptome_v1_Contig_1775	A7S6Y0	Protein SYS1 homolog	1e-35
GOTERM_BP_FAT	GO:0015031~protein transport	0.00532019	QPX_transcriptome_v1_Contig_478	Q9MAS5	Putative vesicle-associated membrane protein 726	4e-06
GOTERM_BP_FAT	GO:0015031~protein transport	0.00532019	QPX_transcriptome_v1_Contig_4590	Q5BCH0	Ubiquitin-like protein ATG12	1e-07
GOTERM_BP_FAT	GO:0045184~establishment of protein localization	0.00570154	QPX_transcriptome_v1_Contig_1494	Q66IJ0	Nucleoporin NUP53	3e-14
GOTERM_BP_FAT	GO:0045184~establishment of protein localization	0.00570154	QPX_transcriptome_v1_Contig_2394	Q6A078	Centrosomal protein of 290 kDa	5e-07
GOTERM_BP_FAT	GO:0045184~establishment of protein localization	0.00570154	QPX_transcriptome_v1_Contig_3083	Q8LEZ8	AP-1 complex subunit sigma-1	6e-61
GOTERM_BP_FAT	GO:0045184~establishment of protein localization	0.00570154	QPX_transcriptome_v1_Contig_2375	Q7S6S4	Mitochondrial import inner membrane translocase subunit tim-16	3e-10
GOTERM_BP_FAT	GO:0045184~establishment of protein localization	0.00570154	QPX_transcriptome_v1_Contig_2353	Q9SFU0	Protein transport protein Sec24-like At3g07100	5e-169
GOTERM_BP_FAT	GO:0045184~establishment of protein localization	0.00570154	QPX_transcriptome_v1_Contig_667	Q39572	Ras-related protein YPTC6	2e-43
GOTERM_BP_FAT	GO:0045184~establishment of protein localization	0.00570154	QPX_transcriptome_v1_Contig_185	Q9CQV7	Mitochondrial import inner membrane translocase subunit TIM14	3e-21
GOTERM_BP_FAT	GO:0045184~establishment of protein localization	0.00570154	QPX_transcriptome_v1_Contig_3656	Q7SXP0	Vesicle-trafficking protein SEC22b-B	2e-47
GOTERM_BP_FAT	GO:0045184~establishment of protein localization	0.00570154	QPX_transcriptome_v1_Contig_1175	Q3SZV6	Mitochondrial import inner membrane translocase subunit Tim21	3e-15
GOTERM_BP_FAT	GO:0045184~establishment of protein localization	0.00570154	QPX_transcriptome_v1_Contig_2855	Q0IIG7	Ras-related protein Rab-5A	4e-41
GOTERM_BP_FAT	GO:0045184~establishment of protein localization	0.00570154	QPX_transcriptome_v1_Contig_6351	Q9SYU4	Peroxisome biogenesis factor 10	3e-41
GOTERM_BP_FAT	GO:0045184~establishment of protein localization	0.00570154	QPX_transcriptome_v1_Contig_3496	P29478	Signal recognition particle subunit SEC65	9e-10
GOTERM_BP_FAT	GO:0045184~establishment of protein localization	0.00570154	QPX_transcriptome_v1_Contig_3156	Q9XGX7	Mitochondrial import inner membrane translocase subunit Tim9	2e-12
GOTERM_BP_FAT	GO:0045184~establishment of protein localization	0.00570154	QPX_transcriptome_v1_Contig_5038	Q9CZE3	Ras-related protein Rab-32	2e-58
GOTERM_BP_FAT	GO:0045184~establishment of protein localization	0.00570154	QPX_transcriptome_v1_Contig_115	Q4FZV2	Vesicle transport protein SFT2B	3e-27
GOTERM_BP_FAT	GO:0045184~establishment of protein localization	0.00570154	QPX_transcriptome_v1_Contig_619	Q2KIU0	Vesicle transport through interaction with t-SNAREs homolog 1B	4e-06
GOTERM_BP_FAT	GO:0045184~establishment of protein localization	0.00570154	QPX_transcriptome_v1_Contig_496	P32897	Mitochondrial import inner membrane translocase subunit TIM23	6e-15
GOTERM_BP_FAT	GO:0045184~establishment of protein localization	0.00570154	QPX_transcriptome_v1_Contig_5964	Q63584	Transmembrane emp24 domain-containing protein 10	3e-30
GOTERM_BP_FAT	GO:0045184~establishment of protein localization	0.00570154	QPX_transcriptome_v1_Contig_2253	Q7SZB5	Charged multivesicular body protein 1b	2e-54
GOTERM_BP_FAT	GO:0045184~establishment of protein localization	0.00570154	QPX_transcriptome_v1_Contig_4066	Q6CC82	Nuclear transport factor 2	1e-14
GOTERM_BP_FAT	GO:0045184~establishment of protein localization	0.00570154	QPX_transcriptome_v1_Contig_269	Q6GQ52	Mitochondrial import inner membrane translocase subunit Tim10-B	3e-14
GOTERM_BP_FAT	GO:0045184~establishment of protein localization	0.00570154	QPX_transcriptome_v1_Contig_1291	Q940S5	Coatomer subunit zeta-1	2e-38
GOTERM_BP_FAT	GO:0045184~establishment of protein localization	0.00570154	QPX_transcriptome_v1_Contig_158	Q01474	GTP-binding protein SAR1B	1e-75
GOTERM_BP_FAT	GO:0045184~establishment of protein localization	0.00570154	QPX_transcriptome_v1_Contig_2930	Q9CQS8	Protein transport protein Sec61 subunit beta	2e-11
GOTERM_BP_FAT	GO:0045184~establishment of protein localization	0.00570154	QPX_transcriptome_v1_Contig_3389	Q3ZBS8	Mitochondrial import inner membrane translocase subunit Tim8 A	2e-13
GOTERM_BP_FAT	GO:0045184~establishment of protein localization	0.00570154	QPX_transcriptome_v1_Contig_3503	P36862	GTP-binding protein yptV3	2e-62
GOTERM_BP_FAT	GO:0045184~establishment of protein localization	0.00570154	QPX_transcriptome_v1_Contig_1929	Q58DS9	Ras-related protein Rab-5C	4e-68
GOTERM_BP_FAT	GO:0045184~establishment of protein localization	0.00570154	QPX_transcriptome_v1_Contig_3217	P59235	Nucleoporin Nup43	2e-07
GOTERM_BP_FAT	GO:0045184~establishment of protein localization	0.00570154	QPX_transcriptome_v1_Contig_8347	Q9STT2	Vacuolar protein sorting-associated protein 29	5e-73
GOTERM_BP_FAT	GO:0045184~establishment of protein localization	0.00570154	QPX_transcriptome_v1_Contig_533	Q6C8M8	Sterol 3-beta-glucosyltransferase	7e-81
GOTERM_BP_FAT	GO:0045184~establishment of protein localization	0.00570154	QPX_transcriptome_v1_Contig_512	Q0WTY4	Vacuolar protein sorting-associated protein 2 homolog 2	2e-27
GOTERM_BP_FAT	GO:0045184~establishment of protein localization	0.00570154	QPX_transcriptome_v1_Contig_651	Q9LFT9	Ras-related protein RABH1e	4e-90
GOTERM_BP_FAT	GO:0045184~establishment of protein localization	0.00570154	QPX_transcriptome_v1_Contig_7913	O04421	Signal recognition particle 14 kDa protein	7e-10
GOTERM_BP_FAT	GO:0045184~establishment of protein localization	0.00570154	QPX_transcriptome_v1_Contig_1775	A7S6Y0	Protein SYS1 homolog	1e-35
GOTERM_BP_FAT	GO:0045184~establishment of protein localization	0.00570154	QPX_transcriptome_v1_Contig_478	Q9MAS5	Putative vesicle-associated membrane protein 726	4e-06
GOTERM_BP_FAT	GO:0045184~establishment of protein localization	0.00570154	QPX_transcriptome_v1_Contig_4590	Q5BCH0	Ubiquitin-like protein ATG12	1e-07
GOTERM_BP_FAT	GO:0043094~cellular metabolic compound salvage	0.00574558	QPX_transcriptome_v1_Contig_2811	Q97TC4	Hypoxanthine-guanine phosphoribosyltransferase	1e-44
GOTERM_BP_FAT	GO:0043094~cellular metabolic compound salvage	0.00574558	QPX_transcriptome_v1_Contig_2410	Q945M1	NADH dehydrogenase [ubiquinone] 1 beta subcomplex subunit 9	2e-12
GOTERM_BP_FAT	GO:0043094~cellular metabolic compound salvage	0.00574558	QPX_transcriptome_v1_Contig_6351	Q9SYU4	Peroxisome biogenesis factor 10	3e-41
GOTERM_BP_FAT	GO:0043094~cellular metabolic compound salvage	0.00574558	QPX_transcriptome_v1_Contig_3571	Q9FMV1	Uncharacterized protein At5g63510, mitochondrial	2e-21
GOTERM_BP_FAT	GO:0043094~cellular metabolic compound salvage	0.00574558	QPX_transcriptome_v1_Contig_1498	Q94C12	NADH dehydrogenase [ubiquinone] 1 beta subcomplex subunit 10-B	6e-08
GOTERM_BP_FAT	GO:0043094~cellular metabolic compound salvage	0.00574558	QPX_transcriptome_v1_Contig_136	Q17Q32	Enolase-phosphatase E1	2e-05
GOTERM_BP_FAT	GO:0043094~cellular metabolic compound salvage	0.00574558	QPX_transcriptome_v1_Contig_2588	Q8RWA7	NADH dehydrogenase [ubiquinone] 1 alpha subcomplex subunit 13-A	2e-20
GOTERM_BP_FAT	GO:0007006~mitochondrial membrane organization	0.00787677	QPX_transcriptome_v1_Contig_3156	Q9XGX7	Mitochondrial import inner membrane translocase subunit Tim9	2e-12
GOTERM_BP_FAT	GO:0007006~mitochondrial membrane organization	0.00787677	QPX_transcriptome_v1_Contig_269	Q6GQ52	Mitochondrial import inner membrane translocase subunit Tim10-B	3e-14
GOTERM_BP_FAT	GO:0007006~mitochondrial membrane organization	0.00787677	QPX_transcriptome_v1_Contig_1895	Q9P7H3	Prohibitin-1	5e-19
GOTERM_BP_FAT	GO:0007006~mitochondrial membrane organization	0.00787677	QPX_transcriptome_v1_Contig_6007	Q9CRB8	Mitochondrial fission process protein 1	2e-09
GOTERM_BP_FAT	GO:0007006~mitochondrial membrane organization	0.00787677	QPX_transcriptome_v1_Contig_3389	Q3ZBS8	Mitochondrial import inner membrane translocase subunit Tim8 A	2e-13
GOTERM_BP_FAT	GO:0006612~protein targeting to membrane	0.0115376	QPX_transcriptome_v1_Contig_3496	P29478	Signal recognition particle subunit SEC65	9e-10
GOTERM_BP_FAT	GO:0006612~protein targeting to membrane	0.0115376	QPX_transcriptome_v1_Contig_3156	Q9XGX7	Mitochondrial import inner membrane translocase subunit Tim9	2e-12
GOTERM_BP_FAT	GO:0006612~protein targeting to membrane	0.0115376	QPX_transcriptome_v1_Contig_269	Q6GQ52	Mitochondrial import inner membrane translocase subunit Tim10-B	3e-14
GOTERM_BP_FAT	GO:0006612~protein targeting to membrane	0.0115376	QPX_transcriptome_v1_Contig_3389	Q3ZBS8	Mitochondrial import inner membrane translocase subunit Tim8 A	2e-13
GOTERM_BP_FAT	GO:0006612~protein targeting to membrane	0.0115376	QPX_transcriptome_v1_Contig_7913	O04421	Signal recognition particle 14 kDa protein	7e-10
GOTERM_BP_FAT	GO:0007005~mitochondrion organization	0.0127751	QPX_transcriptome_v1_Contig_314	Q9V492	Mpv17-like protein	5e-13
GOTERM_BP_FAT	GO:0007005~mitochondrion organization	0.0127751	QPX_transcriptome_v1_Contig_735	O74439	Uncharacterized mitochondrial carrier C1682.09c	7e-109
GOTERM_BP_FAT	GO:0007005~mitochondrion organization	0.0127751	QPX_transcriptome_v1_Contig_3156	Q9XGX7	Mitochondrial import inner membrane translocase subunit Tim9	2e-12
GOTERM_BP_FAT	GO:0007005~mitochondrion organization	0.0127751	QPX_transcriptome_v1_Contig_269	Q6GQ52	Mitochondrial import inner membrane translocase subunit Tim10-B	3e-14
GOTERM_BP_FAT	GO:0007005~mitochondrion organization	0.0127751	QPX_transcriptome_v1_Contig_1895	Q9P7H3	Prohibitin-1	5e-19
GOTERM_BP_FAT	GO:0007005~mitochondrion organization	0.0127751	QPX_transcriptome_v1_Contig_6007	Q9CRB8	Mitochondrial fission process protein 1	2e-09
GOTERM_BP_FAT	GO:0007005~mitochondrion organization	0.0127751	QPX_transcriptome_v1_Contig_3389	Q3ZBS8	Mitochondrial import inner membrane translocase subunit Tim8 A	2e-13
GOTERM_BP_FAT	GO:0007005~mitochondrion organization	0.0127751	QPX_transcriptome_v1_Contig_496	P32897	Mitochondrial import inner membrane translocase subunit TIM23	6e-15
GOTERM_BP_FAT	GO:0007031~peroxisome organization	0.0161354	QPX_transcriptome_v1_Contig_6351	Q9SYU4	Peroxisome biogenesis factor 10	3e-41
GOTERM_BP_FAT	GO:0007031~peroxisome organization	0.0161354	QPX_transcriptome_v1_Contig_1756	Q9SRQ3	Peroxisome biogenesis protein 19-1	2e-30
GOTERM_BP_FAT	GO:0007031~peroxisome organization	0.0161354	QPX_transcriptome_v1_Contig_845	P22307	Non-specific lipid-transfer protein	5e-20
GOTERM_BP_FAT	GO:0007031~peroxisome organization	0.0161354	QPX_transcriptome_v1_Contig_4014	Q8S8S1	Peroxisome biogenesis protein 16	6e-15
GOTERM_BP_FAT	GO:0007031~peroxisome organization	0.0161354	QPX_transcriptome_v1_Contig_1357	P11915	Non-specific lipid-transfer protein	1e-08
GOTERM_BP_FAT	GO:0007007~inner mitochondrial membrane organization	0.0177677	QPX_transcriptome_v1_Contig_3156	Q9XGX7	Mitochondrial import inner membrane translocase subunit Tim9	2e-12
GOTERM_BP_FAT	GO:0007007~inner mitochondrial membrane organization	0.0177677	QPX_transcriptome_v1_Contig_269	Q6GQ52	Mitochondrial import inner membrane translocase subunit Tim10-B	3e-14
GOTERM_BP_FAT	GO:0007007~inner mitochondrial membrane organization	0.0177677	QPX_transcriptome_v1_Contig_1895	Q9P7H3	Prohibitin-1	5e-19
GOTERM_BP_FAT	GO:0007007~inner mitochondrial membrane organization	0.0177677	QPX_transcriptome_v1_Contig_3389	Q3ZBS8	Mitochondrial import inner membrane translocase subunit Tim8 A	2e-13
GOTERM_BP_FAT	GO:0007264~small GTPase mediated signal transduction	0.0201107	QPX_transcriptome_v1_Contig_2855	Q0IIG7	Ras-related protein Rab-5A	4e-41
GOTERM_BP_FAT	GO:0007264~small GTPase mediated signal transduction	0.0201107	QPX_transcriptome_v1_Contig_1929	Q58DS9	Ras-related protein Rab-5C	4e-68
GOTERM_BP_FAT	GO:0007264~small GTPase mediated signal transduction	0.0201107	QPX_transcriptome_v1_Contig_5992	Q2KJ96	ADP-ribosylation factor-like protein 5A	2e-66
GOTERM_BP_FAT	GO:0007264~small GTPase mediated signal transduction	0.0201107	QPX_transcriptome_v1_Contig_5038	Q9CZE3	Ras-related protein Rab-32	2e-58
GOTERM_BP_FAT	GO:0007264~small GTPase mediated signal transduction	0.0201107	QPX_transcriptome_v1_Contig_590	Q6RUV5	Ras-related C3 botulinum toxin substrate 1	3e-102
GOTERM_BP_FAT	GO:0007264~small GTPase mediated signal transduction	0.0201107	QPX_transcriptome_v1_Contig_2434	P60763	Ras-related C3 botulinum toxin substrate 3	4e-79
GOTERM_BP_FAT	GO:0007264~small GTPase mediated signal transduction	0.0201107	QPX_transcriptome_v1_Contig_651	Q9LFT9	Ras-related protein RABH1e	4e-90
GOTERM_BP_FAT	GO:0007264~small GTPase mediated signal transduction	0.0201107	QPX_transcriptome_v1_Contig_3503	P36862	GTP-binding protein yptV3	2e-62
GOTERM_BP_FAT	GO:0007264~small GTPase mediated signal transduction	0.0201107	QPX_transcriptome_v1_Contig_667	Q39572	Ras-related protein YPTC6	2e-43
GOTERM_BP_FAT	GO:0009266~response to temperature stimulus	0.0210635	QPX_transcriptome_v1_Contig_4637	Q9UXR9	Chaperone protein DnaJ	4e-16
GOTERM_BP_FAT	GO:0009266~response to temperature stimulus	0.0210635	QPX_transcriptome_v1_Contig_4064	Q7M9T3	Chaperone protein DnaJ	2e-07
GOTERM_BP_FAT	GO:0009266~response to temperature stimulus	0.0210635	QPX_transcriptome_v1_Contig_554	P51414	60S ribosomal protein L26-1	2e-36
GOTERM_BP_FAT	GO:0009266~response to temperature stimulus	0.0210635	QPX_transcriptome_v1_Contig_5646	Q9FIJ0	Respiratory burst oxidase homolog protein D	3e-51
GOTERM_BP_FAT	GO:0009266~response to temperature stimulus	0.0210635	QPX_transcriptome_v1_Contig_2749	Q04432	Probable chaperone protein HSP31	4e-26
GOTERM_BP_FAT	GO:0009266~response to temperature stimulus	0.0210635	QPX_transcriptome_v1_Contig_275	B3CP03	Chaperone protein DnaJ	3e-19
GOTERM_BP_FAT	GO:0009266~response to temperature stimulus	0.0210635	QPX_transcriptome_v1_Contig_3581	Q9SGW3	26S proteasome non-ATPase regulatory subunit RPN12A	2e-43
GOTERM_BP_FAT	GO:0009266~response to temperature stimulus	0.0210635	QPX_transcriptome_v1_Contig_6	Q943E7	16.9 kDa class I heat shock protein 3	2e-10
GOTERM_BP_FAT	GO:0009266~response to temperature stimulus	0.0210635	QPX_transcriptome_v1_Contig_110	Q84Q72	18.1 kDa class I heat shock protein	6e-19
GOTERM_BP_FAT	GO:0009266~response to temperature stimulus	0.0210635	QPX_transcriptome_v1_Contig_101	P13853	17.6 kDa class I heat shock protein 3	6e-09
GOTERM_BP_FAT	GO:0009266~response to temperature stimulus	0.0210635	QPX_transcriptome_v1_Contig_186	P13853	17.6 kDa class I heat shock protein 3	2e-06
GOTERM_BP_FAT	GO:0046219~indolalkylamine biosynthetic process	0.0266139	QPX_transcriptome_v1_Contig_1338	Q1AU89	Anthranilate phosphoribosyltransferase	2e-77
GOTERM_BP_FAT	GO:0046219~indolalkylamine biosynthetic process	0.0266139	QPX_transcriptome_v1_Contig_2406	P24920	Tryptophan biosynthesis protein TRP1	2e-99
GOTERM_BP_FAT	GO:0046219~indolalkylamine biosynthetic process	0.0266139	QPX_transcriptome_v1_Contig_1019	P13228	Tryptophan synthase	7e-69
GOTERM_BP_FAT	GO:0000162~tryptophan biosynthetic process	0.0266139	QPX_transcriptome_v1_Contig_1338	Q1AU89	Anthranilate phosphoribosyltransferase	2e-77
GOTERM_BP_FAT	GO:0000162~tryptophan biosynthetic process	0.0266139	QPX_transcriptome_v1_Contig_2406	P24920	Tryptophan biosynthesis protein TRP1	2e-99
GOTERM_BP_FAT	GO:0000162~tryptophan biosynthetic process	0.0266139	QPX_transcriptome_v1_Contig_1019	P13228	Tryptophan synthase	7e-69
GOTERM_BP_FAT	GO:0006220~pyrimidine nucleotide metabolic process	0.0361126	QPX_transcriptome_v1_Contig_4488	Q8TCD5	5'(3')-deoxyribonucleotidase, cytosolic type	2e-39
GOTERM_BP_FAT	GO:0006220~pyrimidine nucleotide metabolic process	0.0361126	QPX_transcriptome_v1_Contig_2243	P08955	CAD protein	4e-92
GOTERM_BP_FAT	GO:0006220~pyrimidine nucleotide metabolic process	0.0361126	QPX_transcriptome_v1_Contig_2712	O35435	Dihydroorotate dehydrogenase (quinone), mitochondrial	7e-116
GOTERM_BP_FAT	GO:0006220~pyrimidine nucleotide metabolic process	0.0361126	QPX_transcriptome_v1_Contig_1063	P19804	Nucleoside diphosphate kinase B	5e-55
GOTERM_BP_FAT	GO:0006220~pyrimidine nucleotide metabolic process	0.0361126	QPX_transcriptome_v1_Contig_687	Q7Z8P9	Nucleoside diphosphate kinase	2e-61
GOTERM_BP_FAT	GO:0009628~response to abiotic stimulus	0.0370766	QPX_transcriptome_v1_Contig_2230	Q6PQD5	Serine-protein kinase ATM	2e-58
GOTERM_BP_FAT	GO:0009628~response to abiotic stimulus	0.0370766	QPX_transcriptome_v1_Contig_4637	Q9UXR9	Chaperone protein DnaJ	4e-16
GOTERM_BP_FAT	GO:0009628~response to abiotic stimulus	0.0370766	QPX_transcriptome_v1_Contig_3571	Q9FMV1	Uncharacterized protein At5g63510, mitochondrial	2e-21
GOTERM_BP_FAT	GO:0009628~response to abiotic stimulus	0.0370766	QPX_transcriptome_v1_Contig_275	B3CP03	Chaperone protein DnaJ	3e-19
GOTERM_BP_FAT	GO:0009628~response to abiotic stimulus	0.0370766	QPX_transcriptome_v1_Contig_3581	Q9SGW3	26S proteasome non-ATPase regulatory subunit RPN12A	2e-43
GOTERM_BP_FAT	GO:0009628~response to abiotic stimulus	0.0370766	QPX_transcriptome_v1_Contig_1364	P53849	Zinc finger protein GIS2	9e-15
GOTERM_BP_FAT	GO:0009628~response to abiotic stimulus	0.0370766	QPX_transcriptome_v1_Contig_110	Q84Q72	18.1 kDa class I heat shock protein	6e-19
GOTERM_BP_FAT	GO:0009628~response to abiotic stimulus	0.0370766	QPX_transcriptome_v1_Contig_101	P13853	17.6 kDa class I heat shock protein 3	6e-09
GOTERM_BP_FAT	GO:0009628~response to abiotic stimulus	0.0370766	QPX_transcriptome_v1_Contig_186	P13853	17.6 kDa class I heat shock protein 3	2e-06
GOTERM_BP_FAT	GO:0009628~response to abiotic stimulus	0.0370766	QPX_transcriptome_v1_Contig_1313	Q38884	Eukaryotic translation initiation factor 3 subunit I	2e-104
GOTERM_BP_FAT	GO:0009628~response to abiotic stimulus	0.0370766	QPX_transcriptome_v1_Contig_6363	Q9LEV3	CBS domain-containing protein CBSX3, mitochondrial	4e-20
GOTERM_BP_FAT	GO:0009628~response to abiotic stimulus	0.0370766	QPX_transcriptome_v1_Contig_4064	Q7M9T3	Chaperone protein DnaJ	2e-07
GOTERM_BP_FAT	GO:0009628~response to abiotic stimulus	0.0370766	QPX_transcriptome_v1_Contig_4718	Q9SLG0	Nuclear transcription factor Y subunit B-1	7e-53
GOTERM_BP_FAT	GO:0009628~response to abiotic stimulus	0.0370766	QPX_transcriptome_v1_Contig_554	P51414	60S ribosomal protein L26-1	2e-36
GOTERM_BP_FAT	GO:0009628~response to abiotic stimulus	0.0370766	QPX_transcriptome_v1_Contig_5646	Q9FIJ0	Respiratory burst oxidase homolog protein D	3e-51
GOTERM_BP_FAT	GO:0009628~response to abiotic stimulus	0.0370766	QPX_transcriptome_v1_Contig_590	Q6RUV5	Ras-related C3 botulinum toxin substrate 1	3e-102
GOTERM_BP_FAT	GO:0009628~response to abiotic stimulus	0.0370766	QPX_transcriptome_v1_Contig_2749	Q04432	Probable chaperone protein HSP31	4e-26
GOTERM_BP_FAT	GO:0009628~response to abiotic stimulus	0.0370766	QPX_transcriptome_v1_Contig_6	Q943E7	16.9 kDa class I heat shock protein 3	2e-10
GOTERM_BP_FAT	GO:0009628~response to abiotic stimulus	0.0370766	QPX_transcriptome_v1_Contig_5751	Q8RWD9	Acyl-CoA-binding domain-containing protein 5	1e-22
GOTERM_BP_FAT	GO:0006626~protein targeting to mitochondrion	0.0373851	QPX_transcriptome_v1_Contig_3156	Q9XGX7	Mitochondrial import inner membrane translocase subunit Tim9	2e-12
GOTERM_BP_FAT	GO:0006626~protein targeting to mitochondrion	0.0373851	QPX_transcriptome_v1_Contig_269	Q6GQ52	Mitochondrial import inner membrane translocase subunit Tim10-B	3e-14
GOTERM_BP_FAT	GO:0006626~protein targeting to mitochondrion	0.0373851	QPX_transcriptome_v1_Contig_3389	Q3ZBS8	Mitochondrial import inner membrane translocase subunit Tim8 A	2e-13
GOTERM_BP_FAT	GO:0006626~protein targeting to mitochondrion	0.0373851	QPX_transcriptome_v1_Contig_496	P32897	Mitochondrial import inner membrane translocase subunit TIM23	6e-15
GOTERM_BP_FAT	GO:0070585~protein localization in mitochondrion	0.0373851	QPX_transcriptome_v1_Contig_3156	Q9XGX7	Mitochondrial import inner membrane translocase subunit Tim9	2e-12
GOTERM_BP_FAT	GO:0070585~protein localization in mitochondrion	0.0373851	QPX_transcriptome_v1_Contig_269	Q6GQ52	Mitochondrial import inner membrane translocase subunit Tim10-B	3e-14
GOTERM_BP_FAT	GO:0070585~protein localization in mitochondrion	0.0373851	QPX_transcriptome_v1_Contig_3389	Q3ZBS8	Mitochondrial import inner membrane translocase subunit Tim8 A	2e-13
GOTERM_BP_FAT	GO:0070585~protein localization in mitochondrion	0.0373851	QPX_transcriptome_v1_Contig_496	P32897	Mitochondrial import inner membrane translocase subunit TIM23	6e-15
GOTERM_BP_FAT	GO:0042435~indole derivative biosynthetic process	0.0373851	QPX_transcriptome_v1_Contig_1338	Q1AU89	Anthranilate phosphoribosyltransferase	2e-77
GOTERM_BP_FAT	GO:0042435~indole derivative biosynthetic process	0.0373851	QPX_transcriptome_v1_Contig_2406	P24920	Tryptophan biosynthesis protein TRP1	2e-99
GOTERM_BP_FAT	GO:0042435~indole derivative biosynthetic process	0.0373851	QPX_transcriptome_v1_Contig_1019	P13228	Tryptophan synthase	7e-69
GOTERM_BP_FAT	GO:0042254~ribosome biogenesis	0.0374525	QPX_transcriptome_v1_Contig_1383	Q3SZ12	Probable ribosome biogenesis protein RLP24	5e-59
GOTERM_BP_FAT	GO:0042254~ribosome biogenesis	0.0374525	QPX_transcriptome_v1_Contig_2111	Q9SS17	40S ribosomal protein S24-1	1e-45
GOTERM_BP_FAT	GO:0042254~ribosome biogenesis	0.0374525	QPX_transcriptome_v1_Contig_3608	P32495	H/ACA ribonucleoprotein complex subunit 2	7e-31
GOTERM_BP_FAT	GO:0042254~ribosome biogenesis	0.0374525	QPX_transcriptome_v1_Contig_1559	Q2KHU3	Exosome complex component RRP43	2e-53
GOTERM_BP_FAT	GO:0042254~ribosome biogenesis	0.0374525	QPX_transcriptome_v1_Contig_2653	Q6P8E9	NHP2-like protein 1	3e-52
GOTERM_BP_FAT	GO:0042254~ribosome biogenesis	0.0374525	QPX_transcriptome_v1_Contig_574	P22232	rRNA 2'-O-methyltransferase fibrillarin	1e-126
GOTERM_BP_FAT	GO:0042254~ribosome biogenesis	0.0374525	QPX_transcriptome_v1_Contig_4595	P62312	U6 snRNA-associated Sm-like protein LSm6	2e-31
GOTERM_BP_FAT	GO:0042254~ribosome biogenesis	0.0374525	QPX_transcriptome_v1_Contig_1829	P32899	U3 small nucleolar ribonucleoprotein protein IMP3	2e-69
GOTERM_BP_FAT	GO:0042254~ribosome biogenesis	0.0374525	QPX_transcriptome_v1_Contig_565	Q4P5P0	H/ACA ribonucleoprotein complex subunit 1	1e-30
GOTERM_BP_FAT	GO:0042254~ribosome biogenesis	0.0374525	QPX_transcriptome_v1_Contig_1684	Q9CZJ1	Probable U3 small nucleolar RNA-associated protein 11	8e-38
GOTERM_BP_FAT	GO:0042254~ribosome biogenesis	0.0374525	QPX_transcriptome_v1_Contig_1843	B1ZGB4	50S ribosomal protein L20	2e-24
GOTERM_BP_FAT	GO:0042254~ribosome biogenesis	0.0374525	QPX_transcriptome_v1_Contig_3231	A4QND5	60S ribosome subunit biogenesis protein NIP7 homolog	4e-71
GOTERM_BP_FAT	GO:0042254~ribosome biogenesis	0.0374525	QPX_transcriptome_v1_Contig_202	O22860	60S ribosomal protein L38	1e-28
GOTERM_BP_FAT	GO:0042254~ribosome biogenesis	0.0374525	QPX_transcriptome_v1_Contig_826	Q8VHZ7	U3 small nucleolar ribonucleoprotein protein IMP4	1e-93
GOTERM_BP_FAT	GO:0042254~ribosome biogenesis	0.0374525	QPX_transcriptome_v1_Contig_373	Q9Y3B2	Exosome complex component CSL4	4e-31
GOTERM_BP_FAT	GO:0042254~ribosome biogenesis	0.0374525	QPX_transcriptome_v1_Contig_859	Q92979	Ribosomal RNA small subunit methyltransferase NEP1	1e-57
GOTERM_BP_FAT	GO:0022613~ribonucleoprotein complex biogenesis	0.0423923	QPX_transcriptome_v1_Contig_1383	Q3SZ12	Probable ribosome biogenesis protein RLP24	5e-59
GOTERM_BP_FAT	GO:0022613~ribonucleoprotein complex biogenesis	0.0423923	QPX_transcriptome_v1_Contig_2111	Q9SS17	40S ribosomal protein S24-1	1e-45
GOTERM_BP_FAT	GO:0022613~ribonucleoprotein complex biogenesis	0.0423923	QPX_transcriptome_v1_Contig_3608	P32495	H/ACA ribonucleoprotein complex subunit 2	7e-31
GOTERM_BP_FAT	GO:0022613~ribonucleoprotein complex biogenesis	0.0423923	QPX_transcriptome_v1_Contig_1559	Q2KHU3	Exosome complex component RRP43	2e-53
GOTERM_BP_FAT	GO:0022613~ribonucleoprotein complex biogenesis	0.0423923	QPX_transcriptome_v1_Contig_2653	Q6P8E9	NHP2-like protein 1	3e-52
GOTERM_BP_FAT	GO:0022613~ribonucleoprotein complex biogenesis	0.0423923	QPX_transcriptome_v1_Contig_574	P22232	rRNA 2'-O-methyltransferase fibrillarin	1e-126
GOTERM_BP_FAT	GO:0022613~ribonucleoprotein complex biogenesis	0.0423923	QPX_transcriptome_v1_Contig_4595	P62312	U6 snRNA-associated Sm-like protein LSm6	2e-31
GOTERM_BP_FAT	GO:0022613~ribonucleoprotein complex biogenesis	0.0423923	QPX_transcriptome_v1_Contig_1829	P32899	U3 small nucleolar ribonucleoprotein protein IMP3	2e-69
GOTERM_BP_FAT	GO:0022613~ribonucleoprotein complex biogenesis	0.0423923	QPX_transcriptome_v1_Contig_565	Q4P5P0	H/ACA ribonucleoprotein complex subunit 1	1e-30
GOTERM_BP_FAT	GO:0022613~ribonucleoprotein complex biogenesis	0.0423923	QPX_transcriptome_v1_Contig_1684	Q9CZJ1	Probable U3 small nucleolar RNA-associated protein 11	8e-38
GOTERM_BP_FAT	GO:0022613~ribonucleoprotein complex biogenesis	0.0423923	QPX_transcriptome_v1_Contig_1843	B1ZGB4	50S ribosomal protein L20	2e-24
GOTERM_BP_FAT	GO:0022613~ribonucleoprotein complex biogenesis	0.0423923	QPX_transcriptome_v1_Contig_3231	A4QND5	60S ribosome subunit biogenesis protein NIP7 homolog	4e-71
GOTERM_BP_FAT	GO:0022613~ribonucleoprotein complex biogenesis	0.0423923	QPX_transcriptome_v1_Contig_202	O22860	60S ribosomal protein L38	1e-28
GOTERM_BP_FAT	GO:0022613~ribonucleoprotein complex biogenesis	0.0423923	QPX_transcriptome_v1_Contig_826	Q8VHZ7	U3 small nucleolar ribonucleoprotein protein IMP4	1e-93
GOTERM_BP_FAT	GO:0022613~ribonucleoprotein complex biogenesis	0.0423923	QPX_transcriptome_v1_Contig_3069	Q24562	Splicing factor U2AF 50 kDa subunit	1e-06
GOTERM_BP_FAT	GO:0022613~ribonucleoprotein complex biogenesis	0.0423923	QPX_transcriptome_v1_Contig_373	Q9Y3B2	Exosome complex component CSL4	4e-31
GOTERM_BP_FAT	GO:0022613~ribonucleoprotein complex biogenesis	0.0423923	QPX_transcriptome_v1_Contig_859	Q92979	Ribosomal RNA small subunit methyltransferase NEP1	1e-57
GOTERM_BP_FAT	GO:0009072~aromatic amino acid family metabolic process	0.0448427	QPX_transcriptome_v1_Contig_1338	Q1AU89	Anthranilate phosphoribosyltransferase	2e-77
GOTERM_BP_FAT	GO:0009072~aromatic amino acid family metabolic process	0.0448427	QPX_transcriptome_v1_Contig_2406	P24920	Tryptophan biosynthesis protein TRP1	2e-99
GOTERM_BP_FAT	GO:0009072~aromatic amino acid family metabolic process	0.0448427	QPX_transcriptome_v1_Contig_469	Q93099	Homogentisate 1,2-dioxygenase	2e-161
GOTERM_BP_FAT	GO:0009072~aromatic amino acid family metabolic process	0.0448427	QPX_transcriptome_v1_Contig_1019	P13228	Tryptophan synthase	7e-69
GOTERM_BP_FAT	GO:0009072~aromatic amino acid family metabolic process	0.0448427	QPX_transcriptome_v1_Contig_2907	A6UTA2	3-dehydroquinate dehydratase	2e-21

## Sheet: QPX21_UPreg
Category	GO Term	Enrichment PValue	Corresponding QPX Contig ID	Blast SPID	Blast Description	Blast evalue
GOTERM_BP_FAT	GO:0006412~translation	3.33e-09	QPX_transcriptome_v1_Contig_10325	P20280	60S ribosomal protein L21	3e-58
GOTERM_BP_FAT	GO:0006412~translation	3.33e-09	QPX_transcriptome_v1_Contig_3815	Q2G8Y2	Elongation factor Tu	0
GOTERM_BP_FAT	GO:0006412~translation	3.33e-09	QPX_transcriptome_v1_Contig_809	Q68FR6	Elongation factor 1-gamma	7e-31
GOTERM_BP_FAT	GO:0006412~translation	3.33e-09	QPX_transcriptome_v1_Contig_9459	P84175	40S ribosomal protein S12	5e-68
GOTERM_BP_FAT	GO:0006412~translation	3.33e-09	QPX_transcriptome_v1_Contig_1689	P35980	60S ribosomal protein L18	6e-93
GOTERM_BP_FAT	GO:0006412~translation	3.33e-09	QPX_transcriptome_v1_Contig_10639	P62277	40S ribosomal protein S13	1e-86
GOTERM_BP_FAT	GO:0006412~translation	3.33e-09	QPX_transcriptome_v1_Contig_10176	Q58DT1	60S ribosomal protein L7	3e-101
GOTERM_BP_FAT	GO:0006412~translation	3.33e-09	QPX_transcriptome_v1_Contig_9157	P84100	60S ribosomal protein L19	5e-58
GOTERM_BP_FAT	GO:0006412~translation	3.33e-09	QPX_transcriptome_v1_Contig_122	P28295	Elongation factor 1-alpha	0
GOTERM_BP_FAT	GO:0006412~translation	3.33e-09	QPX_transcriptome_v1_Contig_7197	O61231	60S ribosomal protein L10	4e-62
GOTERM_BP_FAT	GO:0006412~translation	3.33e-09	QPX_transcriptome_v1_Contig_902	A8N7C6	40S ribosomal protein S0	8e-95
GOTERM_BP_FAT	GO:0006412~translation	3.33e-09	QPX_transcriptome_v1_Contig_540	Q8NKF4	60S ribosomal protein L3	7e-176
GOTERM_BP_FAT	GO:0006412~translation	3.33e-09	QPX_transcriptome_v1_Contig_286	A8HS48	40S ribosomal protein S3a	3e-106
GOTERM_BP_FAT	GO:0006412~translation	3.33e-09	QPX_transcriptome_v1_Contig_7526	Q963B7	60S ribosomal protein L9	7e-78
GOTERM_BP_FAT	GO:0006412~translation	3.33e-09	QPX_transcriptome_v1_Contig_1948	Q04462	Valine--tRNA ligase	0
GOTERM_BP_FAT	GO:0006412~translation	3.33e-09	QPX_transcriptome_v1_Contig_1417	P62247	40S ribosomal protein S8	2e-76
GOTERM_BP_FAT	GO:0006412~translation	3.33e-09	QPX_transcriptome_v1_Contig_7813	P48149	40S ribosomal protein S15Aa	2e-82
GOTERM_BP_FAT	GO:0006412~translation	3.33e-09	QPX_transcriptome_v1_Contig_10787	P47835	40S ribosomal protein S3-B	7e-82
GOTERM_BP_FAT	GO:0006412~translation	3.33e-09	QPX_transcriptome_v1_Contig_4228	P53978	Elongation factor 3B	4e-10
GOTERM_BP_FAT	GO:0006412~translation	3.33e-09	QPX_transcriptome_v1_Contig_5239	P53978	Elongation factor 3B	3e-29
GOTERM_BP_FAT	GO:0006412~translation	3.33e-09	QPX_transcriptome_v1_Contig_1877	P53978	Elongation factor 3B	1e-46
GOTERM_BP_FAT	GO:0006412~translation	3.33e-09	QPX_transcriptome_v1_Contig_6650	P02434	60S ribosomal protein L35a	2e-52
GOTERM_BP_FAT	GO:0006412~translation	3.33e-09	QPX_transcriptome_v1_Contig_1557	Q8JFP1	Eukaryotic initiation factor 4A-II	3e-153
GOTERM_BP_FAT	GO:0006412~translation	3.33e-09	QPX_transcriptome_v1_Contig_184	O13672	60S ribosomal protein L8	1e-63
GOTERM_BP_FAT	GO:0006412~translation	3.33e-09	QPX_transcriptome_v1_Contig_1693	C5D3V0	50S ribosomal protein L13	1e-32
GOTERM_BP_FAT	GO:0006412~translation	3.33e-09	QPX_transcriptome_v1_Contig_4917	Q6QMZ8	60S ribosomal protein L11	2e-105
GOTERM_BP_FAT	GO:0006412~translation	3.33e-09	QPX_transcriptome_v1_Contig_10120	P46782	40S ribosomal protein S5	2e-119
GOTERM_BP_FAT	GO:0006412~translation	3.33e-09	QPX_transcriptome_v1_Contig_4518	P91913	60S acidic ribosomal protein P1	3e-29
GOTERM_BP_FAT	GO:0006412~translation	3.33e-09	QPX_transcriptome_v1_Contig_3003	P46781	40S ribosomal protein S9	1e-111
GOTERM_BP_FAT	GO:0006412~translation	3.33e-09	QPX_transcriptome_v1_Contig_10746	Q5RBK1	40S ribosomal protein S27	6e-40
GOTERM_BP_FAT	GO:0006412~translation	3.33e-09	QPX_transcriptome_v1_Contig_1243	Q76E23	Eukaryotic translation initiation factor 4G	3e-39
GOTERM_BP_FAT	GO:0006412~translation	3.33e-09	QPX_transcriptome_v1_Contig_656	Q9DG68	60S acidic ribosomal protein P0	6e-86
GOTERM_BP_FAT	GO:0006412~translation	3.33e-09	QPX_transcriptome_v1_Contig_10407	O76756	40S ribosomal protein S8	3e-92
GOTERM_BP_FAT	GO:0006412~translation	3.33e-09	QPX_transcriptome_v1_Contig_10419	P29551	Elongation factor 3	1e-35
GOTERM_BP_FAT	GO:0006412~translation	3.33e-09	QPX_transcriptome_v1_Contig_2450	P29551	Elongation factor 3	4e-74
GOTERM_BP_FAT	GO:0006412~translation	3.33e-09	QPX_transcriptome_v1_Contig_11149	P62083	40S ribosomal protein S7	7e-92
GOTERM_BP_FAT	GO:0006412~translation	3.33e-09	QPX_transcriptome_v1_Contig_6822	Q07205	Eukaryotic translation initiation factor 5	2e-42
GOTERM_BP_FAT	GO:0006412~translation	3.33e-09	QPX_transcriptome_v1_Contig_6951	Q86FP7	40S ribosomal protein S23	6e-87
GOTERM_BP_FAT	GO:0006412~translation	3.33e-09	QPX_transcriptome_v1_Contig_6554	P62919	60S ribosomal protein L8	9e-150
GOTERM_BP_FAT	GO:0006412~translation	3.33e-09	QPX_transcriptome_v1_Contig_10494	P48159	60S ribosomal protein L23	4e-79
GOTERM_BP_FAT	GO:0006412~translation	3.33e-09	QPX_transcriptome_v1_Contig_3792	Q15046	Lysine--tRNA ligase	0
GOTERM_BP_FAT	GO:0006412~translation	3.33e-09	QPX_transcriptome_v1_Contig_98	Q9SF40	60S ribosomal protein L4-1	2e-132
GOTERM_BP_FAT	GO:0006412~translation	3.33e-09	QPX_transcriptome_v1_Contig_3785	Q3SZ90	60S ribosomal protein L13a	3e-79
GOTERM_BP_FAT	GO:0006412~translation	3.33e-09	QPX_transcriptome_v1_Contig_1394	Q962U1	60S ribosomal protein L13	5e-65
GOTERM_BP_FAT	GO:0006412~translation	3.33e-09	QPX_transcriptome_v1_Contig_7892	Q26481	60S ribosomal protein L5	3e-60
GOTERM_BP_FAT	GO:0006412~translation	3.33e-09	QPX_transcriptome_v1_Contig_602	Q26481	60S ribosomal protein L5	2e-87
GOTERM_BP_FAT	GO:0006412~translation	3.33e-09	QPX_transcriptome_v1_Contig_5705	P17078	60S ribosomal protein L35	3e-61
GOTERM_BP_FAT	GO:0006412~translation	3.33e-09	QPX_transcriptome_v1_Contig_2810	Q9LD55	Eukaryotic translation initiation factor 3 subunit A	6e-131
GOTERM_BP_FAT	GO:0006412~translation	3.33e-09	QPX_transcriptome_v1_Contig_1128	P62844	40S ribosomal protein S15	1e-81
GOTERM_BP_FAT	GO:0006412~translation	3.33e-09	QPX_transcriptome_v1_Contig_5240	Q9YIC0	Elongation factor 1-alpha	0
GOTERM_BP_FAT	GO:0006412~translation	3.33e-09	QPX_transcriptome_v1_Contig_528	Q9SGA6	40S ribosomal protein S19-1	1e-50
GOTERM_BP_FAT	GO:0006412~translation	3.33e-09	QPX_transcriptome_v1_Contig_4828	P60868	40S ribosomal protein S20	5e-67
GOTERM_BP_FAT	GO:0006414~translational elongation	1.46557e-07	QPX_transcriptome_v1_Contig_10325	P20280	60S ribosomal protein L21	3e-58
GOTERM_BP_FAT	GO:0006414~translational elongation	1.46557e-07	QPX_transcriptome_v1_Contig_3815	Q2G8Y2	Elongation factor Tu	0
GOTERM_BP_FAT	GO:0006414~translational elongation	1.46557e-07	QPX_transcriptome_v1_Contig_809	Q68FR6	Elongation factor 1-gamma	7e-31
GOTERM_BP_FAT	GO:0006414~translational elongation	1.46557e-07	QPX_transcriptome_v1_Contig_656	Q9DG68	60S acidic ribosomal protein P0	6e-86
GOTERM_BP_FAT	GO:0006414~translational elongation	1.46557e-07	QPX_transcriptome_v1_Contig_10639	P62277	40S ribosomal protein S13	1e-86
GOTERM_BP_FAT	GO:0006414~translational elongation	1.46557e-07	QPX_transcriptome_v1_Contig_11149	P62083	40S ribosomal protein S7	7e-92
GOTERM_BP_FAT	GO:0006414~translational elongation	1.46557e-07	QPX_transcriptome_v1_Contig_9157	P84100	60S ribosomal protein L19	5e-58
GOTERM_BP_FAT	GO:0006414~translational elongation	1.46557e-07	QPX_transcriptome_v1_Contig_122	P28295	Elongation factor 1-alpha	0
GOTERM_BP_FAT	GO:0006414~translational elongation	1.46557e-07	QPX_transcriptome_v1_Contig_6554	P62919	60S ribosomal protein L8	9e-150
GOTERM_BP_FAT	GO:0006414~translational elongation	1.46557e-07	QPX_transcriptome_v1_Contig_4228	P53978	Elongation factor 3B	4e-10
GOTERM_BP_FAT	GO:0006414~translational elongation	1.46557e-07	QPX_transcriptome_v1_Contig_5239	P53978	Elongation factor 3B	3e-29
GOTERM_BP_FAT	GO:0006414~translational elongation	1.46557e-07	QPX_transcriptome_v1_Contig_1877	P53978	Elongation factor 3B	1e-46
GOTERM_BP_FAT	GO:0006414~translational elongation	1.46557e-07	QPX_transcriptome_v1_Contig_5705	P17078	60S ribosomal protein L35	3e-61
GOTERM_BP_FAT	GO:0006414~translational elongation	1.46557e-07	QPX_transcriptome_v1_Contig_5240	Q9YIC0	Elongation factor 1-alpha	0
GOTERM_BP_FAT	GO:0006414~translational elongation	1.46557e-07	QPX_transcriptome_v1_Contig_10120	P46782	40S ribosomal protein S5	2e-119
GOTERM_BP_FAT	GO:0006414~translational elongation	1.46557e-07	QPX_transcriptome_v1_Contig_4828	P60868	40S ribosomal protein S20	5e-67
GOTERM_BP_FAT	GO:0006414~translational elongation	1.46557e-07	QPX_transcriptome_v1_Contig_3003	P46781	40S ribosomal protein S9	1e-111
GOTERM_BP_FAT	GO:0006414~translational elongation	1.46557e-07	QPX_transcriptome_v1_Contig_4518	P91913	60S acidic ribosomal protein P1	3e-29
GOTERM_BP_FAT	GO:0006091~generation of precursor metabolites and energy	8.86e-07	QPX_transcriptome_v1_Contig_7323	P26856	Cytochrome c oxidase subunit 1	0
GOTERM_BP_FAT	GO:0006091~generation of precursor metabolites and energy	8.86e-07	QPX_transcriptome_v1_Contig_1553	Q92IS3	Pyruvate dehydrogenase E1 component subunit alpha	4e-07
GOTERM_BP_FAT	GO:0006091~generation of precursor metabolites and energy	8.86e-07	QPX_transcriptome_v1_Contig_9524	B0ULL4	NADH-quinone oxidoreductase subunit K	1e-17
GOTERM_BP_FAT	GO:0006091~generation of precursor metabolites and energy	8.86e-07	QPX_transcriptome_v1_Contig_2308	Q6CCU7	Glyceraldehyde-3-phosphate dehydrogenase	1e-156
GOTERM_BP_FAT	GO:0006091~generation of precursor metabolites and energy	8.86e-07	QPX_transcriptome_v1_Contig_8794	Q35522	Cytochrome b	5e-168
GOTERM_BP_FAT	GO:0006091~generation of precursor metabolites and energy	8.86e-07	QPX_transcriptome_v1_Contig_82	O13755	Putative fumarate reductase	3e-75
GOTERM_BP_FAT	GO:0006091~generation of precursor metabolites and energy	8.86e-07	QPX_transcriptome_v1_Contig_1335	O13755	Putative fumarate reductase	2e-130
GOTERM_BP_FAT	GO:0006091~generation of precursor metabolites and energy	8.86e-07	QPX_transcriptome_v1_Contig_3074	Q9ZU25	Probable mitochondrial-processing peptidase subunit alpha-1	3e-98
GOTERM_BP_FAT	GO:0006091~generation of precursor metabolites and energy	8.86e-07	QPX_transcriptome_v1_Contig_5126	P52900	Pyruvate dehydrogenase E1 component subunit alpha, mitochondrial	4e-111
GOTERM_BP_FAT	GO:0006091~generation of precursor metabolites and energy	8.86e-07	QPX_transcriptome_v1_Contig_1794	P07756	Carbamoyl-phosphate synthase [ammonia], mitochondrial	0
GOTERM_BP_FAT	GO:0006091~generation of precursor metabolites and energy	8.86e-07	QPX_transcriptome_v1_Contig_3043	Q920R3	Fatty acid desaturase 1	1e-28
GOTERM_BP_FAT	GO:0006091~generation of precursor metabolites and energy	8.86e-07	QPX_transcriptome_v1_Contig_1973	P36683	Aconitate hydratase 2	0
GOTERM_BP_FAT	GO:0006091~generation of precursor metabolites and energy	8.86e-07	QPX_transcriptome_v1_Contig_1455	A1U1Q6	Malate synthase G	0
GOTERM_BP_FAT	GO:0006091~generation of precursor metabolites and energy	8.86e-07	QPX_transcriptome_v1_Contig_282	Q2VZN0	ATP synthase subunit alpha	0
GOTERM_BP_FAT	GO:0006091~generation of precursor metabolites and energy	8.86e-07	QPX_transcriptome_v1_Contig_1068	P80480	Succinate dehydrogenase [ubiquinone] iron-sulfur subunit	2e-117
GOTERM_BP_FAT	GO:0006091~generation of precursor metabolites and energy	8.86e-07	QPX_transcriptome_v1_Contig_3261	P13929	Beta-enolase	2e-176
GOTERM_BP_FAT	GO:0006091~generation of precursor metabolites and energy	8.86e-07	QPX_transcriptome_v1_Contig_205	Q34951	NADH-ubiquinone oxidoreductase chain 2	4e-17
GOTERM_BP_FAT	GO:0006091~generation of precursor metabolites and energy	8.86e-07	QPX_transcriptome_v1_Contig_5572	P34198	Cytochrome c oxidase subunit 3	3e-49
GOTERM_BP_FAT	GO:0006091~generation of precursor metabolites and energy	8.86e-07	QPX_transcriptome_v1_Contig_3211	Q40089	ATP synthase subunit delta', mitochondrial	1e-15
GOTERM_BP_FAT	GO:0006091~generation of precursor metabolites and energy	8.86e-07	QPX_transcriptome_v1_Contig_3871	P44429	Fructose-bisphosphate aldolase	9e-136
GOTERM_BP_FAT	GO:0006091~generation of precursor metabolites and energy	8.86e-07	QPX_transcriptome_v1_Contig_7310	P98048	Cytochrome c oxidase subunit 2	3e-52
GOTERM_BP_FAT	GO:0006091~generation of precursor metabolites and energy	8.86e-07	QPX_transcriptome_v1_Contig_5866	Q9G1C4	Cytochrome b	2e-90
GOTERM_BP_FAT	GO:0006091~generation of precursor metabolites and energy	8.86e-07	QPX_transcriptome_v1_Contig_1675	Q33820	Cytochrome c oxidase subunit 1	7e-168
GOTERM_BP_FAT	GO:0006091~generation of precursor metabolites and energy	8.86e-07	QPX_transcriptome_v1_Contig_919	P39692	Sulfite reductase [NADPH] flavoprotein component	4e-92
GOTERM_BP_FAT	GO:0006091~generation of precursor metabolites and energy	8.86e-07	QPX_transcriptome_v1_Contig_290	P48494	Triosephosphate isomerase, cytosolic	2e-78
GOTERM_BP_FAT	GO:0006091~generation of precursor metabolites and energy	8.86e-07	QPX_transcriptome_v1_Contig_9258	O21270	NADH-ubiquinone oxidoreductase 49 kDa subunit	2e-109
GOTERM_BP_FAT	GO:0006091~generation of precursor metabolites and energy	8.86e-07	QPX_transcriptome_v1_Contig_1377	Q6ZDY8	Succinate dehydrogenase [ubiquinone] flavoprotein subunit, mitochondrial	0
GOTERM_BP_FAT	GO:0006091~generation of precursor metabolites and energy	8.86e-07	QPX_transcriptome_v1_Contig_1884	Q96UF2	Glyceraldehyde-3-phosphate dehydrogenase 2	1e-156
GOTERM_BP_FAT	GO:0006091~generation of precursor metabolites and energy	8.86e-07	QPX_transcriptome_v1_Contig_986	P08237	6-phosphofructokinase, muscle type	0
GOTERM_BP_FAT	GO:0006091~generation of precursor metabolites and energy	8.86e-07	QPX_transcriptome_v1_Contig_9399	P48897	NADH-ubiquinone oxidoreductase chain 1	1e-64
GOTERM_BP_FAT	GO:0045333~cellular respiration	2.86e-05	QPX_transcriptome_v1_Contig_7323	P26856	Cytochrome c oxidase subunit 1	0
GOTERM_BP_FAT	GO:0045333~cellular respiration	2.86e-05	QPX_transcriptome_v1_Contig_5866	Q9G1C4	Cytochrome b	2e-90
GOTERM_BP_FAT	GO:0045333~cellular respiration	2.86e-05	QPX_transcriptome_v1_Contig_1675	Q33820	Cytochrome c oxidase subunit 1	7e-168
GOTERM_BP_FAT	GO:0045333~cellular respiration	2.86e-05	QPX_transcriptome_v1_Contig_9524	B0ULL4	NADH-quinone oxidoreductase subunit K	1e-17
GOTERM_BP_FAT	GO:0045333~cellular respiration	2.86e-05	QPX_transcriptome_v1_Contig_8794	Q35522	Cytochrome b	5e-168
GOTERM_BP_FAT	GO:0045333~cellular respiration	2.86e-05	QPX_transcriptome_v1_Contig_82	O13755	Putative fumarate reductase	3e-75
GOTERM_BP_FAT	GO:0045333~cellular respiration	2.86e-05	QPX_transcriptome_v1_Contig_1335	O13755	Putative fumarate reductase	2e-130
GOTERM_BP_FAT	GO:0045333~cellular respiration	2.86e-05	QPX_transcriptome_v1_Contig_1455	A1U1Q6	Malate synthase G	0
GOTERM_BP_FAT	GO:0045333~cellular respiration	2.86e-05	QPX_transcriptome_v1_Contig_1973	P36683	Aconitate hydratase 2	0
GOTERM_BP_FAT	GO:0045333~cellular respiration	2.86e-05	QPX_transcriptome_v1_Contig_1068	P80480	Succinate dehydrogenase [ubiquinone] iron-sulfur subunit	2e-117
GOTERM_BP_FAT	GO:0045333~cellular respiration	2.86e-05	QPX_transcriptome_v1_Contig_1377	Q6ZDY8	Succinate dehydrogenase [ubiquinone] flavoprotein subunit, mitochondrial	0
GOTERM_BP_FAT	GO:0045333~cellular respiration	2.86e-05	QPX_transcriptome_v1_Contig_205	Q34951	NADH-ubiquinone oxidoreductase chain 2	4e-17
GOTERM_BP_FAT	GO:0045333~cellular respiration	2.86e-05	QPX_transcriptome_v1_Contig_5572	P34198	Cytochrome c oxidase subunit 3	3e-49
GOTERM_BP_FAT	GO:0045333~cellular respiration	2.86e-05	QPX_transcriptome_v1_Contig_7310	P98048	Cytochrome c oxidase subunit 2	3e-52
GOTERM_BP_FAT	GO:0015980~energy derivation by oxidation of organic compounds	6.81e-05	QPX_transcriptome_v1_Contig_7323	P26856	Cytochrome c oxidase subunit 1	0
GOTERM_BP_FAT	GO:0015980~energy derivation by oxidation of organic compounds	6.81e-05	QPX_transcriptome_v1_Contig_5866	Q9G1C4	Cytochrome b	2e-90
GOTERM_BP_FAT	GO:0015980~energy derivation by oxidation of organic compounds	6.81e-05	QPX_transcriptome_v1_Contig_1675	Q33820	Cytochrome c oxidase subunit 1	7e-168
GOTERM_BP_FAT	GO:0015980~energy derivation by oxidation of organic compounds	6.81e-05	QPX_transcriptome_v1_Contig_9524	B0ULL4	NADH-quinone oxidoreductase subunit K	1e-17
GOTERM_BP_FAT	GO:0015980~energy derivation by oxidation of organic compounds	6.81e-05	QPX_transcriptome_v1_Contig_8794	Q35522	Cytochrome b	5e-168
GOTERM_BP_FAT	GO:0015980~energy derivation by oxidation of organic compounds	6.81e-05	QPX_transcriptome_v1_Contig_82	O13755	Putative fumarate reductase	3e-75
GOTERM_BP_FAT	GO:0015980~energy derivation by oxidation of organic compounds	6.81e-05	QPX_transcriptome_v1_Contig_1335	O13755	Putative fumarate reductase	2e-130
GOTERM_BP_FAT	GO:0015980~energy derivation by oxidation of organic compounds	6.81e-05	QPX_transcriptome_v1_Contig_1794	P07756	Carbamoyl-phosphate synthase [ammonia], mitochondrial	0
GOTERM_BP_FAT	GO:0015980~energy derivation by oxidation of organic compounds	6.81e-05	QPX_transcriptome_v1_Contig_1455	A1U1Q6	Malate synthase G	0
GOTERM_BP_FAT	GO:0015980~energy derivation by oxidation of organic compounds	6.81e-05	QPX_transcriptome_v1_Contig_1973	P36683	Aconitate hydratase 2	0
GOTERM_BP_FAT	GO:0015980~energy derivation by oxidation of organic compounds	6.81e-05	QPX_transcriptome_v1_Contig_1377	Q6ZDY8	Succinate dehydrogenase [ubiquinone] flavoprotein subunit, mitochondrial	0
GOTERM_BP_FAT	GO:0015980~energy derivation by oxidation of organic compounds	6.81e-05	QPX_transcriptome_v1_Contig_1068	P80480	Succinate dehydrogenase [ubiquinone] iron-sulfur subunit	2e-117
GOTERM_BP_FAT	GO:0015980~energy derivation by oxidation of organic compounds	6.81e-05	QPX_transcriptome_v1_Contig_205	Q34951	NADH-ubiquinone oxidoreductase chain 2	4e-17
GOTERM_BP_FAT	GO:0015980~energy derivation by oxidation of organic compounds	6.81e-05	QPX_transcriptome_v1_Contig_5572	P34198	Cytochrome c oxidase subunit 3	3e-49
GOTERM_BP_FAT	GO:0015980~energy derivation by oxidation of organic compounds	6.81e-05	QPX_transcriptome_v1_Contig_7310	P98048	Cytochrome c oxidase subunit 2	3e-52
GOTERM_BP_FAT	GO:0022900~electron transport chain	0.000126	QPX_transcriptome_v1_Contig_7323	P26856	Cytochrome c oxidase subunit 1	0
GOTERM_BP_FAT	GO:0022900~electron transport chain	0.000126	QPX_transcriptome_v1_Contig_5866	Q9G1C4	Cytochrome b	2e-90
GOTERM_BP_FAT	GO:0022900~electron transport chain	0.000126	QPX_transcriptome_v1_Contig_1675	Q33820	Cytochrome c oxidase subunit 1	7e-168
GOTERM_BP_FAT	GO:0022900~electron transport chain	0.000126	QPX_transcriptome_v1_Contig_9524	B0ULL4	NADH-quinone oxidoreductase subunit K	1e-17
GOTERM_BP_FAT	GO:0022900~electron transport chain	0.000126	QPX_transcriptome_v1_Contig_919	P39692	Sulfite reductase [NADPH] flavoprotein component	4e-92
GOTERM_BP_FAT	GO:0022900~electron transport chain	0.000126	QPX_transcriptome_v1_Contig_8794	Q35522	Cytochrome b	5e-168
GOTERM_BP_FAT	GO:0022900~electron transport chain	0.000126	QPX_transcriptome_v1_Contig_3074	Q9ZU25	Probable mitochondrial-processing peptidase subunit alpha-1	3e-98
GOTERM_BP_FAT	GO:0022900~electron transport chain	0.000126	QPX_transcriptome_v1_Contig_3043	Q920R3	Fatty acid desaturase 1	1e-28
GOTERM_BP_FAT	GO:0022900~electron transport chain	0.000126	QPX_transcriptome_v1_Contig_1377	Q6ZDY8	Succinate dehydrogenase [ubiquinone] flavoprotein subunit, mitochondrial	0
GOTERM_BP_FAT	GO:0022900~electron transport chain	0.000126	QPX_transcriptome_v1_Contig_1068	P80480	Succinate dehydrogenase [ubiquinone] iron-sulfur subunit	2e-117
GOTERM_BP_FAT	GO:0022900~electron transport chain	0.000126	QPX_transcriptome_v1_Contig_9258	O21270	NADH-ubiquinone oxidoreductase 49 kDa subunit	2e-109
GOTERM_BP_FAT	GO:0022900~electron transport chain	0.000126	QPX_transcriptome_v1_Contig_205	Q34951	NADH-ubiquinone oxidoreductase chain 2	4e-17
GOTERM_BP_FAT	GO:0022900~electron transport chain	0.000126	QPX_transcriptome_v1_Contig_5572	P34198	Cytochrome c oxidase subunit 3	3e-49
GOTERM_BP_FAT	GO:0022900~electron transport chain	0.000126	QPX_transcriptome_v1_Contig_9399	P48897	NADH-ubiquinone oxidoreductase chain 1	1e-64
GOTERM_BP_FAT	GO:0022900~electron transport chain	0.000126	QPX_transcriptome_v1_Contig_7310	P98048	Cytochrome c oxidase subunit 2	3e-52
GOTERM_BP_FAT	GO:0044275~cellular carbohydrate catabolic process	0.000267	QPX_transcriptome_v1_Contig_1553	Q92IS3	Pyruvate dehydrogenase E1 component subunit alpha	4e-07
GOTERM_BP_FAT	GO:0044275~cellular carbohydrate catabolic process	0.000267	QPX_transcriptome_v1_Contig_4432	Q9EQS0	Transaldolase	3e-131
GOTERM_BP_FAT	GO:0044275~cellular carbohydrate catabolic process	0.000267	QPX_transcriptome_v1_Contig_2308	Q6CCU7	Glyceraldehyde-3-phosphate dehydrogenase	1e-156
GOTERM_BP_FAT	GO:0044275~cellular carbohydrate catabolic process	0.000267	QPX_transcriptome_v1_Contig_290	P48494	Triosephosphate isomerase, cytosolic	2e-78
GOTERM_BP_FAT	GO:0044275~cellular carbohydrate catabolic process	0.000267	QPX_transcriptome_v1_Contig_4096	P23254	Transketolase 1	0
GOTERM_BP_FAT	GO:0044275~cellular carbohydrate catabolic process	0.000267	QPX_transcriptome_v1_Contig_173	Q9XIE2	ABC transporter G family member 36	0
GOTERM_BP_FAT	GO:0044275~cellular carbohydrate catabolic process	0.000267	QPX_transcriptome_v1_Contig_5126	P52900	Pyruvate dehydrogenase E1 component subunit alpha, mitochondrial	4e-111
GOTERM_BP_FAT	GO:0044275~cellular carbohydrate catabolic process	0.000267	QPX_transcriptome_v1_Contig_1794	P07756	Carbamoyl-phosphate synthase [ammonia], mitochondrial	0
GOTERM_BP_FAT	GO:0044275~cellular carbohydrate catabolic process	0.000267	QPX_transcriptome_v1_Contig_5353	Q9FKK7	Xylose isomerase	2e-167
GOTERM_BP_FAT	GO:0044275~cellular carbohydrate catabolic process	0.000267	QPX_transcriptome_v1_Contig_1884	Q96UF2	Glyceraldehyde-3-phosphate dehydrogenase 2	1e-156
GOTERM_BP_FAT	GO:0044275~cellular carbohydrate catabolic process	0.000267	QPX_transcriptome_v1_Contig_986	P08237	6-phosphofructokinase, muscle type	0
GOTERM_BP_FAT	GO:0044275~cellular carbohydrate catabolic process	0.000267	QPX_transcriptome_v1_Contig_3261	P13929	Beta-enolase	2e-176
GOTERM_BP_FAT	GO:0044275~cellular carbohydrate catabolic process	0.000267	QPX_transcriptome_v1_Contig_3871	P44429	Fructose-bisphosphate aldolase	9e-136
GOTERM_BP_FAT	GO:0044275~cellular carbohydrate catabolic process	0.000267	QPX_transcriptome_v1_Contig_615	P80859	6-phosphogluconate dehydrogenase, decarboxylating 2	3e-155
GOTERM_BP_FAT	GO:0006007~glucose catabolic process	0.000325	QPX_transcriptome_v1_Contig_5353	Q9FKK7	Xylose isomerase	2e-167
GOTERM_BP_FAT	GO:0006007~glucose catabolic process	0.000325	QPX_transcriptome_v1_Contig_1884	Q96UF2	Glyceraldehyde-3-phosphate dehydrogenase 2	1e-156
GOTERM_BP_FAT	GO:0006007~glucose catabolic process	0.000325	QPX_transcriptome_v1_Contig_1553	Q92IS3	Pyruvate dehydrogenase E1 component subunit alpha	4e-07
GOTERM_BP_FAT	GO:0006007~glucose catabolic process	0.000325	QPX_transcriptome_v1_Contig_3261	P13929	Beta-enolase	2e-176
GOTERM_BP_FAT	GO:0006007~glucose catabolic process	0.000325	QPX_transcriptome_v1_Contig_986	P08237	6-phosphofructokinase, muscle type	0
GOTERM_BP_FAT	GO:0006007~glucose catabolic process	0.000325	QPX_transcriptome_v1_Contig_4432	Q9EQS0	Transaldolase	3e-131
GOTERM_BP_FAT	GO:0006007~glucose catabolic process	0.000325	QPX_transcriptome_v1_Contig_2308	Q6CCU7	Glyceraldehyde-3-phosphate dehydrogenase	1e-156
GOTERM_BP_FAT	GO:0006007~glucose catabolic process	0.000325	QPX_transcriptome_v1_Contig_290	P48494	Triosephosphate isomerase, cytosolic	2e-78
GOTERM_BP_FAT	GO:0006007~glucose catabolic process	0.000325	QPX_transcriptome_v1_Contig_3871	P44429	Fructose-bisphosphate aldolase	9e-136
GOTERM_BP_FAT	GO:0006007~glucose catabolic process	0.000325	QPX_transcriptome_v1_Contig_4096	P23254	Transketolase 1	0
GOTERM_BP_FAT	GO:0006007~glucose catabolic process	0.000325	QPX_transcriptome_v1_Contig_615	P80859	6-phosphogluconate dehydrogenase, decarboxylating 2	3e-155
GOTERM_BP_FAT	GO:0006007~glucose catabolic process	0.000325	QPX_transcriptome_v1_Contig_5126	P52900	Pyruvate dehydrogenase E1 component subunit alpha, mitochondrial	4e-111
GOTERM_BP_FAT	GO:0019320~hexose catabolic process	0.000411	QPX_transcriptome_v1_Contig_5353	Q9FKK7	Xylose isomerase	2e-167
GOTERM_BP_FAT	GO:0019320~hexose catabolic process	0.000411	QPX_transcriptome_v1_Contig_1884	Q96UF2	Glyceraldehyde-3-phosphate dehydrogenase 2	1e-156
GOTERM_BP_FAT	GO:0019320~hexose catabolic process	0.000411	QPX_transcriptome_v1_Contig_1553	Q92IS3	Pyruvate dehydrogenase E1 component subunit alpha	4e-07
GOTERM_BP_FAT	GO:0019320~hexose catabolic process	0.000411	QPX_transcriptome_v1_Contig_3261	P13929	Beta-enolase	2e-176
GOTERM_BP_FAT	GO:0019320~hexose catabolic process	0.000411	QPX_transcriptome_v1_Contig_986	P08237	6-phosphofructokinase, muscle type	0
GOTERM_BP_FAT	GO:0019320~hexose catabolic process	0.000411	QPX_transcriptome_v1_Contig_4432	Q9EQS0	Transaldolase	3e-131
GOTERM_BP_FAT	GO:0019320~hexose catabolic process	0.000411	QPX_transcriptome_v1_Contig_2308	Q6CCU7	Glyceraldehyde-3-phosphate dehydrogenase	1e-156
GOTERM_BP_FAT	GO:0019320~hexose catabolic process	0.000411	QPX_transcriptome_v1_Contig_290	P48494	Triosephosphate isomerase, cytosolic	2e-78
GOTERM_BP_FAT	GO:0019320~hexose catabolic process	0.000411	QPX_transcriptome_v1_Contig_3871	P44429	Fructose-bisphosphate aldolase	9e-136
GOTERM_BP_FAT	GO:0019320~hexose catabolic process	0.000411	QPX_transcriptome_v1_Contig_4096	P23254	Transketolase 1	0
GOTERM_BP_FAT	GO:0019320~hexose catabolic process	0.000411	QPX_transcriptome_v1_Contig_615	P80859	6-phosphogluconate dehydrogenase, decarboxylating 2	3e-155
GOTERM_BP_FAT	GO:0019320~hexose catabolic process	0.000411	QPX_transcriptome_v1_Contig_5126	P52900	Pyruvate dehydrogenase E1 component subunit alpha, mitochondrial	4e-111
GOTERM_BP_FAT	GO:0046164~alcohol catabolic process	0.00046	QPX_transcriptome_v1_Contig_1553	Q92IS3	Pyruvate dehydrogenase E1 component subunit alpha	4e-07
GOTERM_BP_FAT	GO:0046164~alcohol catabolic process	0.00046	QPX_transcriptome_v1_Contig_4432	Q9EQS0	Transaldolase	3e-131
GOTERM_BP_FAT	GO:0046164~alcohol catabolic process	0.00046	QPX_transcriptome_v1_Contig_2308	Q6CCU7	Glyceraldehyde-3-phosphate dehydrogenase	1e-156
GOTERM_BP_FAT	GO:0046164~alcohol catabolic process	0.00046	QPX_transcriptome_v1_Contig_290	P48494	Triosephosphate isomerase, cytosolic	2e-78
GOTERM_BP_FAT	GO:0046164~alcohol catabolic process	0.00046	QPX_transcriptome_v1_Contig_769	Q64380	Sarcosine dehydrogenase, mitochondrial	0
GOTERM_BP_FAT	GO:0046164~alcohol catabolic process	0.00046	QPX_transcriptome_v1_Contig_4096	P23254	Transketolase 1	0
GOTERM_BP_FAT	GO:0046164~alcohol catabolic process	0.00046	QPX_transcriptome_v1_Contig_5126	P52900	Pyruvate dehydrogenase E1 component subunit alpha, mitochondrial	4e-111
GOTERM_BP_FAT	GO:0046164~alcohol catabolic process	0.00046	QPX_transcriptome_v1_Contig_5353	Q9FKK7	Xylose isomerase	2e-167
GOTERM_BP_FAT	GO:0046164~alcohol catabolic process	0.00046	QPX_transcriptome_v1_Contig_1884	Q96UF2	Glyceraldehyde-3-phosphate dehydrogenase 2	1e-156
GOTERM_BP_FAT	GO:0046164~alcohol catabolic process	0.00046	QPX_transcriptome_v1_Contig_986	P08237	6-phosphofructokinase, muscle type	0
GOTERM_BP_FAT	GO:0046164~alcohol catabolic process	0.00046	QPX_transcriptome_v1_Contig_3261	P13929	Beta-enolase	2e-176
GOTERM_BP_FAT	GO:0046164~alcohol catabolic process	0.00046	QPX_transcriptome_v1_Contig_3871	P44429	Fructose-bisphosphate aldolase	9e-136
GOTERM_BP_FAT	GO:0046164~alcohol catabolic process	0.00046	QPX_transcriptome_v1_Contig_615	P80859	6-phosphogluconate dehydrogenase, decarboxylating 2	3e-155
GOTERM_BP_FAT	GO:0006006~glucose metabolic process	0.000487	QPX_transcriptome_v1_Contig_1553	Q92IS3	Pyruvate dehydrogenase E1 component subunit alpha	4e-07
GOTERM_BP_FAT	GO:0006006~glucose metabolic process	0.000487	QPX_transcriptome_v1_Contig_4432	Q9EQS0	Transaldolase	3e-131
GOTERM_BP_FAT	GO:0006006~glucose metabolic process	0.000487	QPX_transcriptome_v1_Contig_2308	Q6CCU7	Glyceraldehyde-3-phosphate dehydrogenase	1e-156
GOTERM_BP_FAT	GO:0006006~glucose metabolic process	0.000487	QPX_transcriptome_v1_Contig_290	P48494	Triosephosphate isomerase, cytosolic	2e-78
GOTERM_BP_FAT	GO:0006006~glucose metabolic process	0.000487	QPX_transcriptome_v1_Contig_4096	P23254	Transketolase 1	0
GOTERM_BP_FAT	GO:0006006~glucose metabolic process	0.000487	QPX_transcriptome_v1_Contig_5126	P52900	Pyruvate dehydrogenase E1 component subunit alpha, mitochondrial	4e-111
GOTERM_BP_FAT	GO:0006006~glucose metabolic process	0.000487	QPX_transcriptome_v1_Contig_475	A8FLY1	Phosphoenolpyruvate carboxykinase [ATP]	0
GOTERM_BP_FAT	GO:0006006~glucose metabolic process	0.000487	QPX_transcriptome_v1_Contig_1794	P07756	Carbamoyl-phosphate synthase [ammonia], mitochondrial	0
GOTERM_BP_FAT	GO:0006006~glucose metabolic process	0.000487	QPX_transcriptome_v1_Contig_26	Q55905	Phosphoenolpyruvate synthase	0
GOTERM_BP_FAT	GO:0006006~glucose metabolic process	0.000487	QPX_transcriptome_v1_Contig_5353	Q9FKK7	Xylose isomerase	2e-167
GOTERM_BP_FAT	GO:0006006~glucose metabolic process	0.000487	QPX_transcriptome_v1_Contig_1884	Q96UF2	Glyceraldehyde-3-phosphate dehydrogenase 2	1e-156
GOTERM_BP_FAT	GO:0006006~glucose metabolic process	0.000487	QPX_transcriptome_v1_Contig_986	P08237	6-phosphofructokinase, muscle type	0
GOTERM_BP_FAT	GO:0006006~glucose metabolic process	0.000487	QPX_transcriptome_v1_Contig_3261	P13929	Beta-enolase	2e-176
GOTERM_BP_FAT	GO:0006006~glucose metabolic process	0.000487	QPX_transcriptome_v1_Contig_3871	P44429	Fructose-bisphosphate aldolase	9e-136
GOTERM_BP_FAT	GO:0006006~glucose metabolic process	0.000487	QPX_transcriptome_v1_Contig_615	P80859	6-phosphogluconate dehydrogenase, decarboxylating 2	3e-155
GOTERM_BP_FAT	GO:0046365~monosaccharide catabolic process	0.000516	QPX_transcriptome_v1_Contig_5353	Q9FKK7	Xylose isomerase	2e-167
GOTERM_BP_FAT	GO:0046365~monosaccharide catabolic process	0.000516	QPX_transcriptome_v1_Contig_1884	Q96UF2	Glyceraldehyde-3-phosphate dehydrogenase 2	1e-156
GOTERM_BP_FAT	GO:0046365~monosaccharide catabolic process	0.000516	QPX_transcriptome_v1_Contig_1553	Q92IS3	Pyruvate dehydrogenase E1 component subunit alpha	4e-07
GOTERM_BP_FAT	GO:0046365~monosaccharide catabolic process	0.000516	QPX_transcriptome_v1_Contig_3261	P13929	Beta-enolase	2e-176
GOTERM_BP_FAT	GO:0046365~monosaccharide catabolic process	0.000516	QPX_transcriptome_v1_Contig_986	P08237	6-phosphofructokinase, muscle type	0
GOTERM_BP_FAT	GO:0046365~monosaccharide catabolic process	0.000516	QPX_transcriptome_v1_Contig_4432	Q9EQS0	Transaldolase	3e-131
GOTERM_BP_FAT	GO:0046365~monosaccharide catabolic process	0.000516	QPX_transcriptome_v1_Contig_2308	Q6CCU7	Glyceraldehyde-3-phosphate dehydrogenase	1e-156
GOTERM_BP_FAT	GO:0046365~monosaccharide catabolic process	0.000516	QPX_transcriptome_v1_Contig_290	P48494	Triosephosphate isomerase, cytosolic	2e-78
GOTERM_BP_FAT	GO:0046365~monosaccharide catabolic process	0.000516	QPX_transcriptome_v1_Contig_3871	P44429	Fructose-bisphosphate aldolase	9e-136
GOTERM_BP_FAT	GO:0046365~monosaccharide catabolic process	0.000516	QPX_transcriptome_v1_Contig_4096	P23254	Transketolase 1	0
GOTERM_BP_FAT	GO:0046365~monosaccharide catabolic process	0.000516	QPX_transcriptome_v1_Contig_615	P80859	6-phosphogluconate dehydrogenase, decarboxylating 2	3e-155
GOTERM_BP_FAT	GO:0046365~monosaccharide catabolic process	0.000516	QPX_transcriptome_v1_Contig_5126	P52900	Pyruvate dehydrogenase E1 component subunit alpha, mitochondrial	4e-111
GOTERM_BP_FAT	GO:0055114~oxidation reduction	0.000913	QPX_transcriptome_v1_Contig_901	O15460	Prolyl 4-hydroxylase subunit alpha-2	2e-10
GOTERM_BP_FAT	GO:0055114~oxidation reduction	0.000913	QPX_transcriptome_v1_Contig_7323	P26856	Cytochrome c oxidase subunit 1	0
GOTERM_BP_FAT	GO:0055114~oxidation reduction	0.000913	QPX_transcriptome_v1_Contig_3560	Q9EQ20	Methylmalonate-semialdehyde dehydrogenase [acylating], mitochondrial	0
GOTERM_BP_FAT	GO:0055114~oxidation reduction	0.000913	QPX_transcriptome_v1_Contig_1553	Q92IS3	Pyruvate dehydrogenase E1 component subunit alpha	4e-07
GOTERM_BP_FAT	GO:0055114~oxidation reduction	0.000913	QPX_transcriptome_v1_Contig_2308	Q6CCU7	Glyceraldehyde-3-phosphate dehydrogenase	1e-156
GOTERM_BP_FAT	GO:0055114~oxidation reduction	0.000913	QPX_transcriptome_v1_Contig_82	O13755	Putative fumarate reductase	3e-75
GOTERM_BP_FAT	GO:0055114~oxidation reduction	0.000913	QPX_transcriptome_v1_Contig_1335	O13755	Putative fumarate reductase	2e-130
GOTERM_BP_FAT	GO:0055114~oxidation reduction	0.000913	QPX_transcriptome_v1_Contig_5631	Q70LM4	Linear gramicidin synthase subunit D	3e-18
GOTERM_BP_FAT	GO:0055114~oxidation reduction	0.000913	QPX_transcriptome_v1_Contig_1068	P80480	Succinate dehydrogenase [ubiquinone] iron-sulfur subunit	2e-117
GOTERM_BP_FAT	GO:0055114~oxidation reduction	0.000913	QPX_transcriptome_v1_Contig_5572	P34198	Cytochrome c oxidase subunit 3	3e-49
GOTERM_BP_FAT	GO:0055114~oxidation reduction	0.000913	QPX_transcriptome_v1_Contig_205	Q34951	NADH-ubiquinone oxidoreductase chain 2	4e-17
GOTERM_BP_FAT	GO:0055114~oxidation reduction	0.000913	QPX_transcriptome_v1_Contig_982	Q42290	Probable mitochondrial-processing peptidase subunit beta	9e-163
GOTERM_BP_FAT	GO:0055114~oxidation reduction	0.000913	QPX_transcriptome_v1_Contig_372	O23365	Cytochrome P450 97B3, chloroplastic	2e-41
GOTERM_BP_FAT	GO:0055114~oxidation reduction	0.000913	QPX_transcriptome_v1_Contig_7310	P98048	Cytochrome c oxidase subunit 2	3e-52
GOTERM_BP_FAT	GO:0055114~oxidation reduction	0.000913	QPX_transcriptome_v1_Contig_1098	P0A9V0	Uncharacterized protein YdiO	2e-31
GOTERM_BP_FAT	GO:0055114~oxidation reduction	0.000913	QPX_transcriptome_v1_Contig_615	P80859	6-phosphogluconate dehydrogenase, decarboxylating 2	3e-155
GOTERM_BP_FAT	GO:0055114~oxidation reduction	0.000913	QPX_transcriptome_v1_Contig_564	Q1K9C2	Sulfite reductase [NADPH] subunit beta	0
GOTERM_BP_FAT	GO:0055114~oxidation reduction	0.000913	QPX_transcriptome_v1_Contig_5074	Q9R092	17-beta-hydroxysteroid dehydrogenase type 6	9e-16
GOTERM_BP_FAT	GO:0055114~oxidation reduction	0.000913	QPX_transcriptome_v1_Contig_921	Q9NXG6	Transmembrane prolyl 4-hydroxylase	3e-10
GOTERM_BP_FAT	GO:0055114~oxidation reduction	0.000913	QPX_transcriptome_v1_Contig_1223	Q9NXG6	Transmembrane prolyl 4-hydroxylase	6e-15
GOTERM_BP_FAT	GO:0055114~oxidation reduction	0.000913	QPX_transcriptome_v1_Contig_5866	Q9G1C4	Cytochrome b	2e-90
GOTERM_BP_FAT	GO:0055114~oxidation reduction	0.000913	QPX_transcriptome_v1_Contig_919	P39692	Sulfite reductase [NADPH] flavoprotein component	4e-92
GOTERM_BP_FAT	GO:0055114~oxidation reduction	0.000913	QPX_transcriptome_v1_Contig_5870	Q9DBL1	Short/branched chain specific acyl-CoA dehydrogenase, mitochondrial	3e-168
GOTERM_BP_FAT	GO:0055114~oxidation reduction	0.000913	QPX_transcriptome_v1_Contig_999	Q9JHI5	Isovaleryl-CoA dehydrogenase, mitochondrial	8e-81
GOTERM_BP_FAT	GO:0055114~oxidation reduction	0.000913	QPX_transcriptome_v1_Contig_6625	Q96558	UDP-glucose 6-dehydrogenase	0
GOTERM_BP_FAT	GO:0055114~oxidation reduction	0.000913	QPX_transcriptome_v1_Contig_801	P33160	Formate dehydrogenase	0
GOTERM_BP_FAT	GO:0055114~oxidation reduction	0.000913	QPX_transcriptome_v1_Contig_1884	Q96UF2	Glyceraldehyde-3-phosphate dehydrogenase 2	1e-156
GOTERM_BP_FAT	GO:0055114~oxidation reduction	0.000913	QPX_transcriptome_v1_Contig_9935	Q9SMZ4	Alpha-aminoadipic semialdehyde synthase	6e-42
GOTERM_BP_FAT	GO:0055114~oxidation reduction	0.000913	QPX_transcriptome_v1_Contig_4804	P37610	Alpha-ketoglutarate-dependent taurine dioxygenase	4e-20
GOTERM_BP_FAT	GO:0055114~oxidation reduction	0.000913	QPX_transcriptome_v1_Contig_7828	P12695	Dihydrolipoyllysine-residue acetyltransferase component of pyruvate dehydrogenase complex, mitochondrial	2e-28
GOTERM_BP_FAT	GO:0055114~oxidation reduction	0.000913	QPX_transcriptome_v1_Contig_1214	Q0WSF1	Aldehyde dehydrogenase 22A1	3e-142
GOTERM_BP_FAT	GO:0055114~oxidation reduction	0.000913	QPX_transcriptome_v1_Contig_971	O13666	Probable C-5 sterol desaturase 2	9e-09
GOTERM_BP_FAT	GO:0055114~oxidation reduction	0.000913	QPX_transcriptome_v1_Contig_1640	Q9DBT9	Dimethylglycine dehydrogenase, mitochondrial	3e-94
GOTERM_BP_FAT	GO:0055114~oxidation reduction	0.000913	QPX_transcriptome_v1_Contig_1530	P0ABR8	Putative dioxygenase subunit alpha yeaW	3e-17
GOTERM_BP_FAT	GO:0055114~oxidation reduction	0.000913	QPX_transcriptome_v1_Contig_2068	P59723	Hypoxia-inducible factor 1-alpha inhibitor	2e-09
GOTERM_BP_FAT	GO:0055114~oxidation reduction	0.000913	QPX_transcriptome_v1_Contig_254	P59723	Hypoxia-inducible factor 1-alpha inhibitor	2e-16
GOTERM_BP_FAT	GO:0055114~oxidation reduction	0.000913	QPX_transcriptome_v1_Contig_852	P59723	Hypoxia-inducible factor 1-alpha inhibitor	7e-08
GOTERM_BP_FAT	GO:0055114~oxidation reduction	0.000913	QPX_transcriptome_v1_Contig_9524	B0ULL4	NADH-quinone oxidoreductase subunit K	1e-17
GOTERM_BP_FAT	GO:0055114~oxidation reduction	0.000913	QPX_transcriptome_v1_Contig_769	Q64380	Sarcosine dehydrogenase, mitochondrial	0
GOTERM_BP_FAT	GO:0055114~oxidation reduction	0.000913	QPX_transcriptome_v1_Contig_8794	Q35522	Cytochrome b	5e-168
GOTERM_BP_FAT	GO:0055114~oxidation reduction	0.000913	QPX_transcriptome_v1_Contig_3074	Q9ZU25	Probable mitochondrial-processing peptidase subunit alpha-1	3e-98
GOTERM_BP_FAT	GO:0055114~oxidation reduction	0.000913	QPX_transcriptome_v1_Contig_5126	P52900	Pyruvate dehydrogenase E1 component subunit alpha, mitochondrial	4e-111
GOTERM_BP_FAT	GO:0055114~oxidation reduction	0.000913	QPX_transcriptome_v1_Contig_3043	Q920R3	Fatty acid desaturase 1	1e-28
GOTERM_BP_FAT	GO:0055114~oxidation reduction	0.000913	QPX_transcriptome_v1_Contig_1297	B2UNH4	Glycine dehydrogenase [decarboxylating]	0
GOTERM_BP_FAT	GO:0055114~oxidation reduction	0.000913	QPX_transcriptome_v1_Contig_7662	Q20065	Prolyl 4-hydroxylase subunit alpha-2	6e-15
GOTERM_BP_FAT	GO:0055114~oxidation reduction	0.000913	QPX_transcriptome_v1_Contig_1675	Q33820	Cytochrome c oxidase subunit 1	7e-168
GOTERM_BP_FAT	GO:0055114~oxidation reduction	0.000913	QPX_transcriptome_v1_Contig_114	Q39172	NADP-dependent alkenal double bond reductase P1	1e-48
GOTERM_BP_FAT	GO:0055114~oxidation reduction	0.000913	QPX_transcriptome_v1_Contig_224	Q1RJD8	Thioredoxin reductase	2e-62
GOTERM_BP_FAT	GO:0055114~oxidation reduction	0.000913	QPX_transcriptome_v1_Contig_9258	O21270	NADH-ubiquinone oxidoreductase 49 kDa subunit	2e-109
GOTERM_BP_FAT	GO:0055114~oxidation reduction	0.000913	QPX_transcriptome_v1_Contig_1377	Q6ZDY8	Succinate dehydrogenase [ubiquinone] flavoprotein subunit, mitochondrial	0
GOTERM_BP_FAT	GO:0055114~oxidation reduction	0.000913	QPX_transcriptome_v1_Contig_9339	Q9SJ20	Ribonucleoside-diphosphate reductase large subunit	0
GOTERM_BP_FAT	GO:0055114~oxidation reduction	0.000913	QPX_transcriptome_v1_Contig_5623	P40939	Trifunctional enzyme subunit alpha, mitochondrial	1e-64
GOTERM_BP_FAT	GO:0055114~oxidation reduction	0.000913	QPX_transcriptome_v1_Contig_10105	P42577	Soma ferritin	1e-63
GOTERM_BP_FAT	GO:0055114~oxidation reduction	0.000913	QPX_transcriptome_v1_Contig_339	Q9M5K3	Dihydrolipoyl dehydrogenase 1, mitochondrial	9e-174
GOTERM_BP_FAT	GO:0055114~oxidation reduction	0.000913	QPX_transcriptome_v1_Contig_9399	P48897	NADH-ubiquinone oxidoreductase chain 1	1e-64
GOTERM_BP_FAT	GO:0055114~oxidation reduction	0.000913	QPX_transcriptome_v1_Contig_107	A4FY94	UDP-N-acetyl-D-mannosamine dehydrogenase	6e-47
GOTERM_BP_FAT	GO:0055114~oxidation reduction	0.000913	QPX_transcriptome_v1_Contig_467	P16924	Prolyl 4-hydroxylase subunit alpha-1	3e-16
GOTERM_BP_FAT	GO:0055114~oxidation reduction	0.000913	QPX_transcriptome_v1_Contig_1505	P38674	Ketol-acid reductoisomerase, mitochondrial	5e-169
GOTERM_BP_FAT	GO:0006818~hydrogen transport	0.00118275	QPX_transcriptome_v1_Contig_282	Q2VZN0	ATP synthase subunit alpha	0
GOTERM_BP_FAT	GO:0006818~hydrogen transport	0.00118275	QPX_transcriptome_v1_Contig_1770	Q9LY32	ATPase 7, plasma membrane-type	1e-178
GOTERM_BP_FAT	GO:0006818~hydrogen transport	0.00118275	QPX_transcriptome_v1_Contig_2464	P20649	ATPase 1, plasma membrane-type	0
GOTERM_BP_FAT	GO:0006818~hydrogen transport	0.00118275	QPX_transcriptome_v1_Contig_10179	Q7XPY2	Plasma membrane ATPase	8e-45
GOTERM_BP_FAT	GO:0006818~hydrogen transport	0.00118275	QPX_transcriptome_v1_Contig_1121	P31414	Pyrophosphate-energized vacuolar membrane proton pump 1	0
GOTERM_BP_FAT	GO:0006818~hydrogen transport	0.00118275	QPX_transcriptome_v1_Contig_310	P31414	Pyrophosphate-energized vacuolar membrane proton pump 1	0
GOTERM_BP_FAT	GO:0006818~hydrogen transport	0.00118275	QPX_transcriptome_v1_Contig_1674	P21616	Pyrophosphate-energized vacuolar membrane proton pump	0
GOTERM_BP_FAT	GO:0006818~hydrogen transport	0.00118275	QPX_transcriptome_v1_Contig_45	Q56ZN6	Pyrophosphate-energized membrane proton pump 2	0
GOTERM_BP_FAT	GO:0006818~hydrogen transport	0.00118275	QPX_transcriptome_v1_Contig_3211	Q40089	ATP synthase subunit delta', mitochondrial	1e-15
GOTERM_BP_FAT	GO:0015992~proton transport	0.00118275	QPX_transcriptome_v1_Contig_282	Q2VZN0	ATP synthase subunit alpha	0
GOTERM_BP_FAT	GO:0015992~proton transport	0.00118275	QPX_transcriptome_v1_Contig_1770	Q9LY32	ATPase 7, plasma membrane-type	1e-178
GOTERM_BP_FAT	GO:0015992~proton transport	0.00118275	QPX_transcriptome_v1_Contig_2464	P20649	ATPase 1, plasma membrane-type	0
GOTERM_BP_FAT	GO:0015992~proton transport	0.00118275	QPX_transcriptome_v1_Contig_10179	Q7XPY2	Plasma membrane ATPase	8e-45
GOTERM_BP_FAT	GO:0015992~proton transport	0.00118275	QPX_transcriptome_v1_Contig_1121	P31414	Pyrophosphate-energized vacuolar membrane proton pump 1	0
GOTERM_BP_FAT	GO:0015992~proton transport	0.00118275	QPX_transcriptome_v1_Contig_310	P31414	Pyrophosphate-energized vacuolar membrane proton pump 1	0
GOTERM_BP_FAT	GO:0015992~proton transport	0.00118275	QPX_transcriptome_v1_Contig_1674	P21616	Pyrophosphate-energized vacuolar membrane proton pump	0
GOTERM_BP_FAT	GO:0015992~proton transport	0.00118275	QPX_transcriptome_v1_Contig_45	Q56ZN6	Pyrophosphate-energized membrane proton pump 2	0
GOTERM_BP_FAT	GO:0015992~proton transport	0.00118275	QPX_transcriptome_v1_Contig_3211	Q40089	ATP synthase subunit delta', mitochondrial	1e-15
GOTERM_BP_FAT	GO:0016052~carbohydrate catabolic process	0.00187996	QPX_transcriptome_v1_Contig_1553	Q92IS3	Pyruvate dehydrogenase E1 component subunit alpha	4e-07
GOTERM_BP_FAT	GO:0016052~carbohydrate catabolic process	0.00187996	QPX_transcriptome_v1_Contig_4432	Q9EQS0	Transaldolase	3e-131
GOTERM_BP_FAT	GO:0016052~carbohydrate catabolic process	0.00187996	QPX_transcriptome_v1_Contig_2308	Q6CCU7	Glyceraldehyde-3-phosphate dehydrogenase	1e-156
GOTERM_BP_FAT	GO:0016052~carbohydrate catabolic process	0.00187996	QPX_transcriptome_v1_Contig_290	P48494	Triosephosphate isomerase, cytosolic	2e-78
GOTERM_BP_FAT	GO:0016052~carbohydrate catabolic process	0.00187996	QPX_transcriptome_v1_Contig_4096	P23254	Transketolase 1	0
GOTERM_BP_FAT	GO:0016052~carbohydrate catabolic process	0.00187996	QPX_transcriptome_v1_Contig_173	Q9XIE2	ABC transporter G family member 36	0
GOTERM_BP_FAT	GO:0016052~carbohydrate catabolic process	0.00187996	QPX_transcriptome_v1_Contig_5126	P52900	Pyruvate dehydrogenase E1 component subunit alpha, mitochondrial	4e-111
GOTERM_BP_FAT	GO:0016052~carbohydrate catabolic process	0.00187996	QPX_transcriptome_v1_Contig_1794	P07756	Carbamoyl-phosphate synthase [ammonia], mitochondrial	0
GOTERM_BP_FAT	GO:0016052~carbohydrate catabolic process	0.00187996	QPX_transcriptome_v1_Contig_5353	Q9FKK7	Xylose isomerase	2e-167
GOTERM_BP_FAT	GO:0016052~carbohydrate catabolic process	0.00187996	QPX_transcriptome_v1_Contig_1884	Q96UF2	Glyceraldehyde-3-phosphate dehydrogenase 2	1e-156
GOTERM_BP_FAT	GO:0016052~carbohydrate catabolic process	0.00187996	QPX_transcriptome_v1_Contig_986	P08237	6-phosphofructokinase, muscle type	0
GOTERM_BP_FAT	GO:0016052~carbohydrate catabolic process	0.00187996	QPX_transcriptome_v1_Contig_3261	P13929	Beta-enolase	2e-176
GOTERM_BP_FAT	GO:0016052~carbohydrate catabolic process	0.00187996	QPX_transcriptome_v1_Contig_3871	P44429	Fructose-bisphosphate aldolase	9e-136
GOTERM_BP_FAT	GO:0016052~carbohydrate catabolic process	0.00187996	QPX_transcriptome_v1_Contig_615	P80859	6-phosphogluconate dehydrogenase, decarboxylating 2	3e-155
GOTERM_BP_FAT	GO:0019318~hexose metabolic process	0.00237254	QPX_transcriptome_v1_Contig_1553	Q92IS3	Pyruvate dehydrogenase E1 component subunit alpha	4e-07
GOTERM_BP_FAT	GO:0019318~hexose metabolic process	0.00237254	QPX_transcriptome_v1_Contig_4432	Q9EQS0	Transaldolase	3e-131
GOTERM_BP_FAT	GO:0019318~hexose metabolic process	0.00237254	QPX_transcriptome_v1_Contig_2308	Q6CCU7	Glyceraldehyde-3-phosphate dehydrogenase	1e-156
GOTERM_BP_FAT	GO:0019318~hexose metabolic process	0.00237254	QPX_transcriptome_v1_Contig_290	P48494	Triosephosphate isomerase, cytosolic	2e-78
GOTERM_BP_FAT	GO:0019318~hexose metabolic process	0.00237254	QPX_transcriptome_v1_Contig_4096	P23254	Transketolase 1	0
GOTERM_BP_FAT	GO:0019318~hexose metabolic process	0.00237254	QPX_transcriptome_v1_Contig_5126	P52900	Pyruvate dehydrogenase E1 component subunit alpha, mitochondrial	4e-111
GOTERM_BP_FAT	GO:0019318~hexose metabolic process	0.00237254	QPX_transcriptome_v1_Contig_10889	Q24451	Alpha-mannosidase 2	3e-18
GOTERM_BP_FAT	GO:0019318~hexose metabolic process	0.00237254	QPX_transcriptome_v1_Contig_475	A8FLY1	Phosphoenolpyruvate carboxykinase [ATP]	0
GOTERM_BP_FAT	GO:0019318~hexose metabolic process	0.00237254	QPX_transcriptome_v1_Contig_1794	P07756	Carbamoyl-phosphate synthase [ammonia], mitochondrial	0
GOTERM_BP_FAT	GO:0019318~hexose metabolic process	0.00237254	QPX_transcriptome_v1_Contig_26	Q55905	Phosphoenolpyruvate synthase	0
GOTERM_BP_FAT	GO:0019318~hexose metabolic process	0.00237254	QPX_transcriptome_v1_Contig_5353	Q9FKK7	Xylose isomerase	2e-167
GOTERM_BP_FAT	GO:0019318~hexose metabolic process	0.00237254	QPX_transcriptome_v1_Contig_1884	Q96UF2	Glyceraldehyde-3-phosphate dehydrogenase 2	1e-156
GOTERM_BP_FAT	GO:0019318~hexose metabolic process	0.00237254	QPX_transcriptome_v1_Contig_3261	P13929	Beta-enolase	2e-176
GOTERM_BP_FAT	GO:0019318~hexose metabolic process	0.00237254	QPX_transcriptome_v1_Contig_986	P08237	6-phosphofructokinase, muscle type	0
GOTERM_BP_FAT	GO:0019318~hexose metabolic process	0.00237254	QPX_transcriptome_v1_Contig_3871	P44429	Fructose-bisphosphate aldolase	9e-136
GOTERM_BP_FAT	GO:0019318~hexose metabolic process	0.00237254	QPX_transcriptome_v1_Contig_615	P80859	6-phosphogluconate dehydrogenase, decarboxylating 2	3e-155
GOTERM_BP_FAT	GO:0009142~nucleoside triphosphate biosynthetic process	0.00243987	QPX_transcriptome_v1_Contig_5956	P37367	Cation-transporting ATPase pma1	1e-27
GOTERM_BP_FAT	GO:0009142~nucleoside triphosphate biosynthetic process	0.00243987	QPX_transcriptome_v1_Contig_883	P63688	Probable cation-transporting ATPase F	1e-115
GOTERM_BP_FAT	GO:0009142~nucleoside triphosphate biosynthetic process	0.00243987	QPX_transcriptome_v1_Contig_1267	P63688	Probable cation-transporting ATPase F	4e-158
GOTERM_BP_FAT	GO:0009142~nucleoside triphosphate biosynthetic process	0.00243987	QPX_transcriptome_v1_Contig_679	P63688	Probable cation-transporting ATPase F	3e-156
GOTERM_BP_FAT	GO:0009142~nucleoside triphosphate biosynthetic process	0.00243987	QPX_transcriptome_v1_Contig_282	Q2VZN0	ATP synthase subunit alpha	0
GOTERM_BP_FAT	GO:0009142~nucleoside triphosphate biosynthetic process	0.00243987	QPX_transcriptome_v1_Contig_1770	Q9LY32	ATPase 7, plasma membrane-type	1e-178
GOTERM_BP_FAT	GO:0009142~nucleoside triphosphate biosynthetic process	0.00243987	QPX_transcriptome_v1_Contig_2464	P20649	ATPase 1, plasma membrane-type	0
GOTERM_BP_FAT	GO:0009142~nucleoside triphosphate biosynthetic process	0.00243987	QPX_transcriptome_v1_Contig_10179	Q7XPY2	Plasma membrane ATPase	8e-45
GOTERM_BP_FAT	GO:0009142~nucleoside triphosphate biosynthetic process	0.00243987	QPX_transcriptome_v1_Contig_9339	Q9SJ20	Ribonucleoside-diphosphate reductase large subunit	0
GOTERM_BP_FAT	GO:0009142~nucleoside triphosphate biosynthetic process	0.00243987	QPX_transcriptome_v1_Contig_1732	Q9SH30	Putative copper-transporting ATPase 3	0
GOTERM_BP_FAT	GO:0009142~nucleoside triphosphate biosynthetic process	0.00243987	QPX_transcriptome_v1_Contig_3211	Q40089	ATP synthase subunit delta', mitochondrial	1e-15
GOTERM_BP_FAT	GO:0009142~nucleoside triphosphate biosynthetic process	0.00243987	QPX_transcriptome_v1_Contig_1237	P92939	Calcium-transporting ATPase 1, endoplasmic reticulum-type	0
GOTERM_BP_FAT	GO:0009142~nucleoside triphosphate biosynthetic process	0.00243987	QPX_transcriptome_v1_Contig_858	Q9S7J8	Copper-transporting ATPase RAN1	2e-173
GOTERM_BP_FAT	GO:0009142~nucleoside triphosphate biosynthetic process	0.00243987	QPX_transcriptome_v1_Contig_5764	Q9LI83	Phospholipid-transporting ATPase 10	1e-113
GOTERM_BP_FAT	GO:0006754~ATP biosynthetic process	0.00352609	QPX_transcriptome_v1_Contig_5956	P37367	Cation-transporting ATPase pma1	1e-27
GOTERM_BP_FAT	GO:0006754~ATP biosynthetic process	0.00352609	QPX_transcriptome_v1_Contig_883	P63688	Probable cation-transporting ATPase F	1e-115
GOTERM_BP_FAT	GO:0006754~ATP biosynthetic process	0.00352609	QPX_transcriptome_v1_Contig_1267	P63688	Probable cation-transporting ATPase F	4e-158
GOTERM_BP_FAT	GO:0006754~ATP biosynthetic process	0.00352609	QPX_transcriptome_v1_Contig_679	P63688	Probable cation-transporting ATPase F	3e-156
GOTERM_BP_FAT	GO:0006754~ATP biosynthetic process	0.00352609	QPX_transcriptome_v1_Contig_282	Q2VZN0	ATP synthase subunit alpha	0
GOTERM_BP_FAT	GO:0006754~ATP biosynthetic process	0.00352609	QPX_transcriptome_v1_Contig_1770	Q9LY32	ATPase 7, plasma membrane-type	1e-178
GOTERM_BP_FAT	GO:0006754~ATP biosynthetic process	0.00352609	QPX_transcriptome_v1_Contig_2464	P20649	ATPase 1, plasma membrane-type	0
GOTERM_BP_FAT	GO:0006754~ATP biosynthetic process	0.00352609	QPX_transcriptome_v1_Contig_10179	Q7XPY2	Plasma membrane ATPase	8e-45
GOTERM_BP_FAT	GO:0006754~ATP biosynthetic process	0.00352609	QPX_transcriptome_v1_Contig_1732	Q9SH30	Putative copper-transporting ATPase 3	0
GOTERM_BP_FAT	GO:0006754~ATP biosynthetic process	0.00352609	QPX_transcriptome_v1_Contig_3211	Q40089	ATP synthase subunit delta', mitochondrial	1e-15
GOTERM_BP_FAT	GO:0006754~ATP biosynthetic process	0.00352609	QPX_transcriptome_v1_Contig_1237	P92939	Calcium-transporting ATPase 1, endoplasmic reticulum-type	0
GOTERM_BP_FAT	GO:0006754~ATP biosynthetic process	0.00352609	QPX_transcriptome_v1_Contig_858	Q9S7J8	Copper-transporting ATPase RAN1	2e-173
GOTERM_BP_FAT	GO:0006754~ATP biosynthetic process	0.00352609	QPX_transcriptome_v1_Contig_5764	Q9LI83	Phospholipid-transporting ATPase 10	1e-113
GOTERM_BP_FAT	GO:0006098~pentose-phosphate shunt	0.00448026	QPX_transcriptome_v1_Contig_5353	Q9FKK7	Xylose isomerase	2e-167
GOTERM_BP_FAT	GO:0006098~pentose-phosphate shunt	0.00448026	QPX_transcriptome_v1_Contig_4432	Q9EQS0	Transaldolase	3e-131
GOTERM_BP_FAT	GO:0006098~pentose-phosphate shunt	0.00448026	QPX_transcriptome_v1_Contig_290	P48494	Triosephosphate isomerase, cytosolic	2e-78
GOTERM_BP_FAT	GO:0006098~pentose-phosphate shunt	0.00448026	QPX_transcriptome_v1_Contig_4096	P23254	Transketolase 1	0
GOTERM_BP_FAT	GO:0006098~pentose-phosphate shunt	0.00448026	QPX_transcriptome_v1_Contig_615	P80859	6-phosphogluconate dehydrogenase, decarboxylating 2	3e-155
GOTERM_BP_FAT	GO:0017000~antibiotic biosynthetic process	0.00448026	QPX_transcriptome_v1_Contig_5631	Q70LM4	Linear gramicidin synthase subunit D	3e-18
GOTERM_BP_FAT	GO:0017000~antibiotic biosynthetic process	0.00448026	QPX_transcriptome_v1_Contig_7823	Q70LM5	Linear gramicidin synthase subunit C	5e-40
GOTERM_BP_FAT	GO:0017000~antibiotic biosynthetic process	0.00448026	QPX_transcriptome_v1_Contig_5432	Q70LM5	Linear gramicidin synthase subunit C	2e-53
GOTERM_BP_FAT	GO:0017000~antibiotic biosynthetic process	0.00448026	QPX_transcriptome_v1_Contig_2578	Q70LM5	Linear gramicidin synthase subunit C	3e-70
GOTERM_BP_FAT	GO:0017000~antibiotic biosynthetic process	0.00448026	QPX_transcriptome_v1_Contig_8186	Q70LM6	Linear gramicidin synthase subunit B	3e-24
GOTERM_BP_FAT	GO:0017000~antibiotic biosynthetic process	0.00448026	QPX_transcriptome_v1_Contig_9510	Q04747	Surfactin synthase subunit 2	6e-48
GOTERM_BP_FAT	GO:0017000~antibiotic biosynthetic process	0.00448026	QPX_transcriptome_v1_Contig_9327	O30409	Tyrocidine synthase 3	7e-19
GOTERM_BP_FAT	GO:0046034~ATP metabolic process	0.00576106	QPX_transcriptome_v1_Contig_5956	P37367	Cation-transporting ATPase pma1	1e-27
GOTERM_BP_FAT	GO:0046034~ATP metabolic process	0.00576106	QPX_transcriptome_v1_Contig_883	P63688	Probable cation-transporting ATPase F	1e-115
GOTERM_BP_FAT	GO:0046034~ATP metabolic process	0.00576106	QPX_transcriptome_v1_Contig_1267	P63688	Probable cation-transporting ATPase F	4e-158
GOTERM_BP_FAT	GO:0046034~ATP metabolic process	0.00576106	QPX_transcriptome_v1_Contig_679	P63688	Probable cation-transporting ATPase F	3e-156
GOTERM_BP_FAT	GO:0046034~ATP metabolic process	0.00576106	QPX_transcriptome_v1_Contig_282	Q2VZN0	ATP synthase subunit alpha	0
GOTERM_BP_FAT	GO:0046034~ATP metabolic process	0.00576106	QPX_transcriptome_v1_Contig_1770	Q9LY32	ATPase 7, plasma membrane-type	1e-178
GOTERM_BP_FAT	GO:0046034~ATP metabolic process	0.00576106	QPX_transcriptome_v1_Contig_2464	P20649	ATPase 1, plasma membrane-type	0
GOTERM_BP_FAT	GO:0046034~ATP metabolic process	0.00576106	QPX_transcriptome_v1_Contig_10179	Q7XPY2	Plasma membrane ATPase	8e-45
GOTERM_BP_FAT	GO:0046034~ATP metabolic process	0.00576106	QPX_transcriptome_v1_Contig_1732	Q9SH30	Putative copper-transporting ATPase 3	0
GOTERM_BP_FAT	GO:0046034~ATP metabolic process	0.00576106	QPX_transcriptome_v1_Contig_3211	Q40089	ATP synthase subunit delta', mitochondrial	1e-15
GOTERM_BP_FAT	GO:0046034~ATP metabolic process	0.00576106	QPX_transcriptome_v1_Contig_1237	P92939	Calcium-transporting ATPase 1, endoplasmic reticulum-type	0
GOTERM_BP_FAT	GO:0046034~ATP metabolic process	0.00576106	QPX_transcriptome_v1_Contig_858	Q9S7J8	Copper-transporting ATPase RAN1	2e-173
GOTERM_BP_FAT	GO:0046034~ATP metabolic process	0.00576106	QPX_transcriptome_v1_Contig_5764	Q9LI83	Phospholipid-transporting ATPase 10	1e-113
GOTERM_BP_FAT	GO:0009206~purine ribonucleoside triphosphate biosynthetic process	0.00576106	QPX_transcriptome_v1_Contig_5956	P37367	Cation-transporting ATPase pma1	1e-27
GOTERM_BP_FAT	GO:0009206~purine ribonucleoside triphosphate biosynthetic process	0.00576106	QPX_transcriptome_v1_Contig_883	P63688	Probable cation-transporting ATPase F	1e-115
GOTERM_BP_FAT	GO:0009206~purine ribonucleoside triphosphate biosynthetic process	0.00576106	QPX_transcriptome_v1_Contig_1267	P63688	Probable cation-transporting ATPase F	4e-158
GOTERM_BP_FAT	GO:0009206~purine ribonucleoside triphosphate biosynthetic process	0.00576106	QPX_transcriptome_v1_Contig_679	P63688	Probable cation-transporting ATPase F	3e-156
GOTERM_BP_FAT	GO:0009206~purine ribonucleoside triphosphate biosynthetic process	0.00576106	QPX_transcriptome_v1_Contig_282	Q2VZN0	ATP synthase subunit alpha	0
GOTERM_BP_FAT	GO:0009206~purine ribonucleoside triphosphate biosynthetic process	0.00576106	QPX_transcriptome_v1_Contig_1770	Q9LY32	ATPase 7, plasma membrane-type	1e-178
GOTERM_BP_FAT	GO:0009206~purine ribonucleoside triphosphate biosynthetic process	0.00576106	QPX_transcriptome_v1_Contig_2464	P20649	ATPase 1, plasma membrane-type	0
GOTERM_BP_FAT	GO:0009206~purine ribonucleoside triphosphate biosynthetic process	0.00576106	QPX_transcriptome_v1_Contig_10179	Q7XPY2	Plasma membrane ATPase	8e-45
GOTERM_BP_FAT	GO:0009206~purine ribonucleoside triphosphate biosynthetic process	0.00576106	QPX_transcriptome_v1_Contig_1732	Q9SH30	Putative copper-transporting ATPase 3	0
GOTERM_BP_FAT	GO:0009206~purine ribonucleoside triphosphate biosynthetic process	0.00576106	QPX_transcriptome_v1_Contig_3211	Q40089	ATP synthase subunit delta', mitochondrial	1e-15
GOTERM_BP_FAT	GO:0009206~purine ribonucleoside triphosphate biosynthetic process	0.00576106	QPX_transcriptome_v1_Contig_1237	P92939	Calcium-transporting ATPase 1, endoplasmic reticulum-type	0
GOTERM_BP_FAT	GO:0009206~purine ribonucleoside triphosphate biosynthetic process	0.00576106	QPX_transcriptome_v1_Contig_858	Q9S7J8	Copper-transporting ATPase RAN1	2e-173
GOTERM_BP_FAT	GO:0009206~purine ribonucleoside triphosphate biosynthetic process	0.00576106	QPX_transcriptome_v1_Contig_5764	Q9LI83	Phospholipid-transporting ATPase 10	1e-113
GOTERM_BP_FAT	GO:0009145~purine nucleoside triphosphate biosynthetic process	0.00576106	QPX_transcriptome_v1_Contig_5956	P37367	Cation-transporting ATPase pma1	1e-27
GOTERM_BP_FAT	GO:0009145~purine nucleoside triphosphate biosynthetic process	0.00576106	QPX_transcriptome_v1_Contig_883	P63688	Probable cation-transporting ATPase F	1e-115
GOTERM_BP_FAT	GO:0009145~purine nucleoside triphosphate biosynthetic process	0.00576106	QPX_transcriptome_v1_Contig_1267	P63688	Probable cation-transporting ATPase F	4e-158
GOTERM_BP_FAT	GO:0009145~purine nucleoside triphosphate biosynthetic process	0.00576106	QPX_transcriptome_v1_Contig_679	P63688	Probable cation-transporting ATPase F	3e-156
GOTERM_BP_FAT	GO:0009145~purine nucleoside triphosphate biosynthetic process	0.00576106	QPX_transcriptome_v1_Contig_282	Q2VZN0	ATP synthase subunit alpha	0
GOTERM_BP_FAT	GO:0009145~purine nucleoside triphosphate biosynthetic process	0.00576106	QPX_transcriptome_v1_Contig_1770	Q9LY32	ATPase 7, plasma membrane-type	1e-178
GOTERM_BP_FAT	GO:0009145~purine nucleoside triphosphate biosynthetic process	0.00576106	QPX_transcriptome_v1_Contig_2464	P20649	ATPase 1, plasma membrane-type	0
GOTERM_BP_FAT	GO:0009145~purine nucleoside triphosphate biosynthetic process	0.00576106	QPX_transcriptome_v1_Contig_10179	Q7XPY2	Plasma membrane ATPase	8e-45
GOTERM_BP_FAT	GO:0009145~purine nucleoside triphosphate biosynthetic process	0.00576106	QPX_transcriptome_v1_Contig_1732	Q9SH30	Putative copper-transporting ATPase 3	0
GOTERM_BP_FAT	GO:0009145~purine nucleoside triphosphate biosynthetic process	0.00576106	QPX_transcriptome_v1_Contig_3211	Q40089	ATP synthase subunit delta', mitochondrial	1e-15
GOTERM_BP_FAT	GO:0009145~purine nucleoside triphosphate biosynthetic process	0.00576106	QPX_transcriptome_v1_Contig_1237	P92939	Calcium-transporting ATPase 1, endoplasmic reticulum-type	0
GOTERM_BP_FAT	GO:0009145~purine nucleoside triphosphate biosynthetic process	0.00576106	QPX_transcriptome_v1_Contig_858	Q9S7J8	Copper-transporting ATPase RAN1	2e-173
GOTERM_BP_FAT	GO:0009145~purine nucleoside triphosphate biosynthetic process	0.00576106	QPX_transcriptome_v1_Contig_5764	Q9LI83	Phospholipid-transporting ATPase 10	1e-113
GOTERM_BP_FAT	GO:0009201~ribonucleoside triphosphate biosynthetic process	0.00576106	QPX_transcriptome_v1_Contig_5956	P37367	Cation-transporting ATPase pma1	1e-27
GOTERM_BP_FAT	GO:0009201~ribonucleoside triphosphate biosynthetic process	0.00576106	QPX_transcriptome_v1_Contig_883	P63688	Probable cation-transporting ATPase F	1e-115
GOTERM_BP_FAT	GO:0009201~ribonucleoside triphosphate biosynthetic process	0.00576106	QPX_transcriptome_v1_Contig_1267	P63688	Probable cation-transporting ATPase F	4e-158
GOTERM_BP_FAT	GO:0009201~ribonucleoside triphosphate biosynthetic process	0.00576106	QPX_transcriptome_v1_Contig_679	P63688	Probable cation-transporting ATPase F	3e-156
GOTERM_BP_FAT	GO:0009201~ribonucleoside triphosphate biosynthetic process	0.00576106	QPX_transcriptome_v1_Contig_282	Q2VZN0	ATP synthase subunit alpha	0
GOTERM_BP_FAT	GO:0009201~ribonucleoside triphosphate biosynthetic process	0.00576106	QPX_transcriptome_v1_Contig_1770	Q9LY32	ATPase 7, plasma membrane-type	1e-178
GOTERM_BP_FAT	GO:0009201~ribonucleoside triphosphate biosynthetic process	0.00576106	QPX_transcriptome_v1_Contig_2464	P20649	ATPase 1, plasma membrane-type	0
GOTERM_BP_FAT	GO:0009201~ribonucleoside triphosphate biosynthetic process	0.00576106	QPX_transcriptome_v1_Contig_10179	Q7XPY2	Plasma membrane ATPase	8e-45
GOTERM_BP_FAT	GO:0009201~ribonucleoside triphosphate biosynthetic process	0.00576106	QPX_transcriptome_v1_Contig_1732	Q9SH30	Putative copper-transporting ATPase 3	0
GOTERM_BP_FAT	GO:0009201~ribonucleoside triphosphate biosynthetic process	0.00576106	QPX_transcriptome_v1_Contig_3211	Q40089	ATP synthase subunit delta', mitochondrial	1e-15
GOTERM_BP_FAT	GO:0009201~ribonucleoside triphosphate biosynthetic process	0.00576106	QPX_transcriptome_v1_Contig_1237	P92939	Calcium-transporting ATPase 1, endoplasmic reticulum-type	0
GOTERM_BP_FAT	GO:0009201~ribonucleoside triphosphate biosynthetic process	0.00576106	QPX_transcriptome_v1_Contig_858	Q9S7J8	Copper-transporting ATPase RAN1	2e-173
GOTERM_BP_FAT	GO:0009201~ribonucleoside triphosphate biosynthetic process	0.00576106	QPX_transcriptome_v1_Contig_5764	Q9LI83	Phospholipid-transporting ATPase 10	1e-113
GOTERM_BP_FAT	GO:0009141~nucleoside triphosphate metabolic process	0.00615691	QPX_transcriptome_v1_Contig_5956	P37367	Cation-transporting ATPase pma1	1e-27
GOTERM_BP_FAT	GO:0009141~nucleoside triphosphate metabolic process	0.00615691	QPX_transcriptome_v1_Contig_883	P63688	Probable cation-transporting ATPase F	1e-115
GOTERM_BP_FAT	GO:0009141~nucleoside triphosphate metabolic process	0.00615691	QPX_transcriptome_v1_Contig_1267	P63688	Probable cation-transporting ATPase F	4e-158
GOTERM_BP_FAT	GO:0009141~nucleoside triphosphate metabolic process	0.00615691	QPX_transcriptome_v1_Contig_679	P63688	Probable cation-transporting ATPase F	3e-156
GOTERM_BP_FAT	GO:0009141~nucleoside triphosphate metabolic process	0.00615691	QPX_transcriptome_v1_Contig_282	Q2VZN0	ATP synthase subunit alpha	0
GOTERM_BP_FAT	GO:0009141~nucleoside triphosphate metabolic process	0.00615691	QPX_transcriptome_v1_Contig_1770	Q9LY32	ATPase 7, plasma membrane-type	1e-178
GOTERM_BP_FAT	GO:0009141~nucleoside triphosphate metabolic process	0.00615691	QPX_transcriptome_v1_Contig_2464	P20649	ATPase 1, plasma membrane-type	0
GOTERM_BP_FAT	GO:0009141~nucleoside triphosphate metabolic process	0.00615691	QPX_transcriptome_v1_Contig_10179	Q7XPY2	Plasma membrane ATPase	8e-45
GOTERM_BP_FAT	GO:0009141~nucleoside triphosphate metabolic process	0.00615691	QPX_transcriptome_v1_Contig_9339	Q9SJ20	Ribonucleoside-diphosphate reductase large subunit	0
GOTERM_BP_FAT	GO:0009141~nucleoside triphosphate metabolic process	0.00615691	QPX_transcriptome_v1_Contig_1732	Q9SH30	Putative copper-transporting ATPase 3	0
GOTERM_BP_FAT	GO:0009141~nucleoside triphosphate metabolic process	0.00615691	QPX_transcriptome_v1_Contig_3211	Q40089	ATP synthase subunit delta', mitochondrial	1e-15
GOTERM_BP_FAT	GO:0009141~nucleoside triphosphate metabolic process	0.00615691	QPX_transcriptome_v1_Contig_1237	P92939	Calcium-transporting ATPase 1, endoplasmic reticulum-type	0
GOTERM_BP_FAT	GO:0009141~nucleoside triphosphate metabolic process	0.00615691	QPX_transcriptome_v1_Contig_858	Q9S7J8	Copper-transporting ATPase RAN1	2e-173
GOTERM_BP_FAT	GO:0009141~nucleoside triphosphate metabolic process	0.00615691	QPX_transcriptome_v1_Contig_5764	Q9LI83	Phospholipid-transporting ATPase 10	1e-113
GOTERM_BP_FAT	GO:0009060~aerobic respiration	0.00632507	QPX_transcriptome_v1_Contig_7323	P26856	Cytochrome c oxidase subunit 1	0
GOTERM_BP_FAT	GO:0009060~aerobic respiration	0.00632507	QPX_transcriptome_v1_Contig_1973	P36683	Aconitate hydratase 2	0
GOTERM_BP_FAT	GO:0009060~aerobic respiration	0.00632507	QPX_transcriptome_v1_Contig_1455	A1U1Q6	Malate synthase G	0
GOTERM_BP_FAT	GO:0009060~aerobic respiration	0.00632507	QPX_transcriptome_v1_Contig_1377	Q6ZDY8	Succinate dehydrogenase [ubiquinone] flavoprotein subunit, mitochondrial	0
GOTERM_BP_FAT	GO:0009060~aerobic respiration	0.00632507	QPX_transcriptome_v1_Contig_1068	P80480	Succinate dehydrogenase [ubiquinone] iron-sulfur subunit	2e-117
GOTERM_BP_FAT	GO:0009060~aerobic respiration	0.00632507	QPX_transcriptome_v1_Contig_1675	Q33820	Cytochrome c oxidase subunit 1	7e-168
GOTERM_BP_FAT	GO:0009060~aerobic respiration	0.00632507	QPX_transcriptome_v1_Contig_82	O13755	Putative fumarate reductase	3e-75
GOTERM_BP_FAT	GO:0009060~aerobic respiration	0.00632507	QPX_transcriptome_v1_Contig_1335	O13755	Putative fumarate reductase	2e-130
GOTERM_BP_FAT	GO:0006739~NADP metabolic process	0.00697551	QPX_transcriptome_v1_Contig_5353	Q9FKK7	Xylose isomerase	2e-167
GOTERM_BP_FAT	GO:0006739~NADP metabolic process	0.00697551	QPX_transcriptome_v1_Contig_4432	Q9EQS0	Transaldolase	3e-131
GOTERM_BP_FAT	GO:0006739~NADP metabolic process	0.00697551	QPX_transcriptome_v1_Contig_290	P48494	Triosephosphate isomerase, cytosolic	2e-78
GOTERM_BP_FAT	GO:0006739~NADP metabolic process	0.00697551	QPX_transcriptome_v1_Contig_4096	P23254	Transketolase 1	0
GOTERM_BP_FAT	GO:0006739~NADP metabolic process	0.00697551	QPX_transcriptome_v1_Contig_615	P80859	6-phosphogluconate dehydrogenase, decarboxylating 2	3e-155
GOTERM_BP_FAT	GO:0016999~antibiotic metabolic process	0.00697551	QPX_transcriptome_v1_Contig_5631	Q70LM4	Linear gramicidin synthase subunit D	3e-18
GOTERM_BP_FAT	GO:0016999~antibiotic metabolic process	0.00697551	QPX_transcriptome_v1_Contig_7823	Q70LM5	Linear gramicidin synthase subunit C	5e-40
GOTERM_BP_FAT	GO:0016999~antibiotic metabolic process	0.00697551	QPX_transcriptome_v1_Contig_5432	Q70LM5	Linear gramicidin synthase subunit C	2e-53
GOTERM_BP_FAT	GO:0016999~antibiotic metabolic process	0.00697551	QPX_transcriptome_v1_Contig_2578	Q70LM5	Linear gramicidin synthase subunit C	3e-70
GOTERM_BP_FAT	GO:0016999~antibiotic metabolic process	0.00697551	QPX_transcriptome_v1_Contig_8186	Q70LM6	Linear gramicidin synthase subunit B	3e-24
GOTERM_BP_FAT	GO:0016999~antibiotic metabolic process	0.00697551	QPX_transcriptome_v1_Contig_9510	Q04747	Surfactin synthase subunit 2	6e-48
GOTERM_BP_FAT	GO:0016999~antibiotic metabolic process	0.00697551	QPX_transcriptome_v1_Contig_9327	O30409	Tyrocidine synthase 3	7e-19
GOTERM_BP_FAT	GO:0005996~monosaccharide metabolic process	0.00754909	QPX_transcriptome_v1_Contig_1553	Q92IS3	Pyruvate dehydrogenase E1 component subunit alpha	4e-07
GOTERM_BP_FAT	GO:0005996~monosaccharide metabolic process	0.00754909	QPX_transcriptome_v1_Contig_4432	Q9EQS0	Transaldolase	3e-131
GOTERM_BP_FAT	GO:0005996~monosaccharide metabolic process	0.00754909	QPX_transcriptome_v1_Contig_2308	Q6CCU7	Glyceraldehyde-3-phosphate dehydrogenase	1e-156
GOTERM_BP_FAT	GO:0005996~monosaccharide metabolic process	0.00754909	QPX_transcriptome_v1_Contig_290	P48494	Triosephosphate isomerase, cytosolic	2e-78
GOTERM_BP_FAT	GO:0005996~monosaccharide metabolic process	0.00754909	QPX_transcriptome_v1_Contig_4096	P23254	Transketolase 1	0
GOTERM_BP_FAT	GO:0005996~monosaccharide metabolic process	0.00754909	QPX_transcriptome_v1_Contig_5126	P52900	Pyruvate dehydrogenase E1 component subunit alpha, mitochondrial	4e-111
GOTERM_BP_FAT	GO:0005996~monosaccharide metabolic process	0.00754909	QPX_transcriptome_v1_Contig_10889	Q24451	Alpha-mannosidase 2	3e-18
GOTERM_BP_FAT	GO:0005996~monosaccharide metabolic process	0.00754909	QPX_transcriptome_v1_Contig_475	A8FLY1	Phosphoenolpyruvate carboxykinase [ATP]	0
GOTERM_BP_FAT	GO:0005996~monosaccharide metabolic process	0.00754909	QPX_transcriptome_v1_Contig_1794	P07756	Carbamoyl-phosphate synthase [ammonia], mitochondrial	0
GOTERM_BP_FAT	GO:0005996~monosaccharide metabolic process	0.00754909	QPX_transcriptome_v1_Contig_26	Q55905	Phosphoenolpyruvate synthase	0
GOTERM_BP_FAT	GO:0005996~monosaccharide metabolic process	0.00754909	QPX_transcriptome_v1_Contig_5353	Q9FKK7	Xylose isomerase	2e-167
GOTERM_BP_FAT	GO:0005996~monosaccharide metabolic process	0.00754909	QPX_transcriptome_v1_Contig_1884	Q96UF2	Glyceraldehyde-3-phosphate dehydrogenase 2	1e-156
GOTERM_BP_FAT	GO:0005996~monosaccharide metabolic process	0.00754909	QPX_transcriptome_v1_Contig_3261	P13929	Beta-enolase	2e-176
GOTERM_BP_FAT	GO:0005996~monosaccharide metabolic process	0.00754909	QPX_transcriptome_v1_Contig_986	P08237	6-phosphofructokinase, muscle type	0
GOTERM_BP_FAT	GO:0005996~monosaccharide metabolic process	0.00754909	QPX_transcriptome_v1_Contig_3871	P44429	Fructose-bisphosphate aldolase	9e-136
GOTERM_BP_FAT	GO:0005996~monosaccharide metabolic process	0.00754909	QPX_transcriptome_v1_Contig_615	P80859	6-phosphogluconate dehydrogenase, decarboxylating 2	3e-155
GOTERM_BP_FAT	GO:0022904~respiratory electron transport chain	0.00836054	QPX_transcriptome_v1_Contig_5866	Q9G1C4	Cytochrome b	2e-90
GOTERM_BP_FAT	GO:0022904~respiratory electron transport chain	0.00836054	QPX_transcriptome_v1_Contig_5572	P34198	Cytochrome c oxidase subunit 3	3e-49
GOTERM_BP_FAT	GO:0022904~respiratory electron transport chain	0.00836054	QPX_transcriptome_v1_Contig_205	Q34951	NADH-ubiquinone oxidoreductase chain 2	4e-17
GOTERM_BP_FAT	GO:0022904~respiratory electron transport chain	0.00836054	QPX_transcriptome_v1_Contig_9524	B0ULL4	NADH-quinone oxidoreductase subunit K	1e-17
GOTERM_BP_FAT	GO:0022904~respiratory electron transport chain	0.00836054	QPX_transcriptome_v1_Contig_7310	P98048	Cytochrome c oxidase subunit 2	3e-52
GOTERM_BP_FAT	GO:0022904~respiratory electron transport chain	0.00836054	QPX_transcriptome_v1_Contig_8794	Q35522	Cytochrome b	5e-168
GOTERM_BP_FAT	GO:0006812~cation transport	0.00852425	QPX_transcriptome_v1_Contig_3533	Q5FWH7	Zinc transporter ZIP12	3e-23
GOTERM_BP_FAT	GO:0006812~cation transport	0.00852425	QPX_transcriptome_v1_Contig_787	Q3AU90	Zinc transporter ZupT	3e-39
GOTERM_BP_FAT	GO:0006812~cation transport	0.00852425	QPX_transcriptome_v1_Contig_2977	Q9FVN0	Ammonium transporter 1 member 3	9e-86
GOTERM_BP_FAT	GO:0006812~cation transport	0.00852425	QPX_transcriptome_v1_Contig_10179	Q7XPY2	Plasma membrane ATPase	8e-45
GOTERM_BP_FAT	GO:0006812~cation transport	0.00852425	QPX_transcriptome_v1_Contig_1674	P21616	Pyrophosphate-energized vacuolar membrane proton pump	0
GOTERM_BP_FAT	GO:0006812~cation transport	0.00852425	QPX_transcriptome_v1_Contig_173	Q9XIE2	ABC transporter G family member 36	0
GOTERM_BP_FAT	GO:0006812~cation transport	0.00852425	QPX_transcriptome_v1_Contig_5956	P37367	Cation-transporting ATPase pma1	1e-27
GOTERM_BP_FAT	GO:0006812~cation transport	0.00852425	QPX_transcriptome_v1_Contig_883	P63688	Probable cation-transporting ATPase F	1e-115
GOTERM_BP_FAT	GO:0006812~cation transport	0.00852425	QPX_transcriptome_v1_Contig_1267	P63688	Probable cation-transporting ATPase F	4e-158
GOTERM_BP_FAT	GO:0006812~cation transport	0.00852425	QPX_transcriptome_v1_Contig_679	P63688	Probable cation-transporting ATPase F	3e-156
GOTERM_BP_FAT	GO:0006812~cation transport	0.00852425	QPX_transcriptome_v1_Contig_1005	P55016	Solute carrier family 12 member 1	5e-159
GOTERM_BP_FAT	GO:0006812~cation transport	0.00852425	QPX_transcriptome_v1_Contig_282	Q2VZN0	ATP synthase subunit alpha	0
GOTERM_BP_FAT	GO:0006812~cation transport	0.00852425	QPX_transcriptome_v1_Contig_1770	Q9LY32	ATPase 7, plasma membrane-type	1e-178
GOTERM_BP_FAT	GO:0006812~cation transport	0.00852425	QPX_transcriptome_v1_Contig_2464	P20649	ATPase 1, plasma membrane-type	0
GOTERM_BP_FAT	GO:0006812~cation transport	0.00852425	QPX_transcriptome_v1_Contig_1121	P31414	Pyrophosphate-energized vacuolar membrane proton pump 1	0
GOTERM_BP_FAT	GO:0006812~cation transport	0.00852425	QPX_transcriptome_v1_Contig_310	P31414	Pyrophosphate-energized vacuolar membrane proton pump 1	0
GOTERM_BP_FAT	GO:0006812~cation transport	0.00852425	QPX_transcriptome_v1_Contig_45	Q56ZN6	Pyrophosphate-energized membrane proton pump 2	0
GOTERM_BP_FAT	GO:0006812~cation transport	0.00852425	QPX_transcriptome_v1_Contig_1732	Q9SH30	Putative copper-transporting ATPase 3	0
GOTERM_BP_FAT	GO:0006812~cation transport	0.00852425	QPX_transcriptome_v1_Contig_10105	P42577	Soma ferritin	1e-63
GOTERM_BP_FAT	GO:0006812~cation transport	0.00852425	QPX_transcriptome_v1_Contig_3211	Q40089	ATP synthase subunit delta', mitochondrial	1e-15
GOTERM_BP_FAT	GO:0006812~cation transport	0.00852425	QPX_transcriptome_v1_Contig_1237	P92939	Calcium-transporting ATPase 1, endoplasmic reticulum-type	0
GOTERM_BP_FAT	GO:0006812~cation transport	0.00852425	QPX_transcriptome_v1_Contig_858	Q9S7J8	Copper-transporting ATPase RAN1	2e-173
GOTERM_BP_FAT	GO:0006812~cation transport	0.00852425	QPX_transcriptome_v1_Contig_6061	P01103	Transcriptional activator Myb	5e-46
GOTERM_BP_FAT	GO:0009199~ribonucleoside triphosphate metabolic process	0.00897391	QPX_transcriptome_v1_Contig_5956	P37367	Cation-transporting ATPase pma1	1e-27
GOTERM_BP_FAT	GO:0009199~ribonucleoside triphosphate metabolic process	0.00897391	QPX_transcriptome_v1_Contig_883	P63688	Probable cation-transporting ATPase F	1e-115
GOTERM_BP_FAT	GO:0009199~ribonucleoside triphosphate metabolic process	0.00897391	QPX_transcriptome_v1_Contig_1267	P63688	Probable cation-transporting ATPase F	4e-158
GOTERM_BP_FAT	GO:0009199~ribonucleoside triphosphate metabolic process	0.00897391	QPX_transcriptome_v1_Contig_679	P63688	Probable cation-transporting ATPase F	3e-156
GOTERM_BP_FAT	GO:0009199~ribonucleoside triphosphate metabolic process	0.00897391	QPX_transcriptome_v1_Contig_282	Q2VZN0	ATP synthase subunit alpha	0
GOTERM_BP_FAT	GO:0009199~ribonucleoside triphosphate metabolic process	0.00897391	QPX_transcriptome_v1_Contig_1770	Q9LY32	ATPase 7, plasma membrane-type	1e-178
GOTERM_BP_FAT	GO:0009199~ribonucleoside triphosphate metabolic process	0.00897391	QPX_transcriptome_v1_Contig_2464	P20649	ATPase 1, plasma membrane-type	0
GOTERM_BP_FAT	GO:0009199~ribonucleoside triphosphate metabolic process	0.00897391	QPX_transcriptome_v1_Contig_10179	Q7XPY2	Plasma membrane ATPase	8e-45
GOTERM_BP_FAT	GO:0009199~ribonucleoside triphosphate metabolic process	0.00897391	QPX_transcriptome_v1_Contig_1732	Q9SH30	Putative copper-transporting ATPase 3	0
GOTERM_BP_FAT	GO:0009199~ribonucleoside triphosphate metabolic process	0.00897391	QPX_transcriptome_v1_Contig_3211	Q40089	ATP synthase subunit delta', mitochondrial	1e-15
GOTERM_BP_FAT	GO:0009199~ribonucleoside triphosphate metabolic process	0.00897391	QPX_transcriptome_v1_Contig_1237	P92939	Calcium-transporting ATPase 1, endoplasmic reticulum-type	0
GOTERM_BP_FAT	GO:0009199~ribonucleoside triphosphate metabolic process	0.00897391	QPX_transcriptome_v1_Contig_858	Q9S7J8	Copper-transporting ATPase RAN1	2e-173
GOTERM_BP_FAT	GO:0009199~ribonucleoside triphosphate metabolic process	0.00897391	QPX_transcriptome_v1_Contig_5764	Q9LI83	Phospholipid-transporting ATPase 10	1e-113
GOTERM_BP_FAT	GO:0009205~purine ribonucleoside triphosphate metabolic process11	0.00897391	QPX_transcriptome_v1_Contig_5956	P37367	Cation-transporting ATPase pma1	1e-27
GOTERM_BP_FAT	GO:0009205~purine ribonucleoside triphosphate metabolic process11	0.00897391	QPX_transcriptome_v1_Contig_883	P63688	Probable cation-transporting ATPase F	1e-115
GOTERM_BP_FAT	GO:0009205~purine ribonucleoside triphosphate metabolic process11	0.00897391	QPX_transcriptome_v1_Contig_1267	P63688	Probable cation-transporting ATPase F	4e-158
GOTERM_BP_FAT	GO:0009205~purine ribonucleoside triphosphate metabolic process11	0.00897391	QPX_transcriptome_v1_Contig_679	P63688	Probable cation-transporting ATPase F	3e-156
GOTERM_BP_FAT	GO:0009205~purine ribonucleoside triphosphate metabolic process11	0.00897391	QPX_transcriptome_v1_Contig_282	Q2VZN0	ATP synthase subunit alpha	0
GOTERM_BP_FAT	GO:0009205~purine ribonucleoside triphosphate metabolic process11	0.00897391	QPX_transcriptome_v1_Contig_1770	Q9LY32	ATPase 7, plasma membrane-type	1e-178
GOTERM_BP_FAT	GO:0009205~purine ribonucleoside triphosphate metabolic process11	0.00897391	QPX_transcriptome_v1_Contig_2464	P20649	ATPase 1, plasma membrane-type	0
GOTERM_BP_FAT	GO:0009205~purine ribonucleoside triphosphate metabolic process11	0.00897391	QPX_transcriptome_v1_Contig_10179	Q7XPY2	Plasma membrane ATPase	8e-45
GOTERM_BP_FAT	GO:0009205~purine ribonucleoside triphosphate metabolic process11	0.00897391	QPX_transcriptome_v1_Contig_1732	Q9SH30	Putative copper-transporting ATPase 3	0
GOTERM_BP_FAT	GO:0009205~purine ribonucleoside triphosphate metabolic process11	0.00897391	QPX_transcriptome_v1_Contig_3211	Q40089	ATP synthase subunit delta', mitochondrial	1e-15
GOTERM_BP_FAT	GO:0009205~purine ribonucleoside triphosphate metabolic process11	0.00897391	QPX_transcriptome_v1_Contig_1237	P92939	Calcium-transporting ATPase 1, endoplasmic reticulum-type	0
GOTERM_BP_FAT	GO:0009205~purine ribonucleoside triphosphate metabolic process11	0.00897391	QPX_transcriptome_v1_Contig_858	Q9S7J8	Copper-transporting ATPase RAN1	2e-173
GOTERM_BP_FAT	GO:0009205~purine ribonucleoside triphosphate metabolic process11	0.00897391	QPX_transcriptome_v1_Contig_5764	Q9LI83	Phospholipid-transporting ATPase 10	1e-113
GOTERM_BP_FAT	GO:0017144~drug metabolic process	0.0102421	QPX_transcriptome_v1_Contig_5631	Q70LM4	Linear gramicidin synthase subunit D	3e-18
GOTERM_BP_FAT	GO:0017144~drug metabolic process	0.0102421	QPX_transcriptome_v1_Contig_7823	Q70LM5	Linear gramicidin synthase subunit C	5e-40
GOTERM_BP_FAT	GO:0017144~drug metabolic process	0.0102421	QPX_transcriptome_v1_Contig_5432	Q70LM5	Linear gramicidin synthase subunit C	2e-53
GOTERM_BP_FAT	GO:0017144~drug metabolic process	0.0102421	QPX_transcriptome_v1_Contig_2578	Q70LM5	Linear gramicidin synthase subunit C	3e-70
GOTERM_BP_FAT	GO:0017144~drug metabolic process	0.0102421	QPX_transcriptome_v1_Contig_8186	Q70LM6	Linear gramicidin synthase subunit B	3e-24
GOTERM_BP_FAT	GO:0017144~drug metabolic process	0.0102421	QPX_transcriptome_v1_Contig_9510	Q04747	Surfactin synthase subunit 2	6e-48
GOTERM_BP_FAT	GO:0017144~drug metabolic process	0.0102421	QPX_transcriptome_v1_Contig_9327	O30409	Tyrocidine synthase 3	7e-19
GOTERM_BP_FAT	GO:0009144~purine nucleoside triphosphate metabolic process	0.0103041	QPX_transcriptome_v1_Contig_5956	P37367	Cation-transporting ATPase pma1	1e-27
GOTERM_BP_FAT	GO:0009144~purine nucleoside triphosphate metabolic process	0.0103041	QPX_transcriptome_v1_Contig_883	P63688	Probable cation-transporting ATPase F	1e-115
GOTERM_BP_FAT	GO:0009144~purine nucleoside triphosphate metabolic process	0.0103041	QPX_transcriptome_v1_Contig_1267	P63688	Probable cation-transporting ATPase F	4e-158
GOTERM_BP_FAT	GO:0009144~purine nucleoside triphosphate metabolic process	0.0103041	QPX_transcriptome_v1_Contig_679	P63688	Probable cation-transporting ATPase F	3e-156
GOTERM_BP_FAT	GO:0009144~purine nucleoside triphosphate metabolic process	0.0103041	QPX_transcriptome_v1_Contig_282	Q2VZN0	ATP synthase subunit alpha	0
GOTERM_BP_FAT	GO:0009144~purine nucleoside triphosphate metabolic process	0.0103041	QPX_transcriptome_v1_Contig_1770	Q9LY32	ATPase 7, plasma membrane-type	1e-178
GOTERM_BP_FAT	GO:0009144~purine nucleoside triphosphate metabolic process	0.0103041	QPX_transcriptome_v1_Contig_2464	P20649	ATPase 1, plasma membrane-type	0
GOTERM_BP_FAT	GO:0009144~purine nucleoside triphosphate metabolic process	0.0103041	QPX_transcriptome_v1_Contig_10179	Q7XPY2	Plasma membrane ATPase	8e-45
GOTERM_BP_FAT	GO:0009144~purine nucleoside triphosphate metabolic process	0.0103041	QPX_transcriptome_v1_Contig_1732	Q9SH30	Putative copper-transporting ATPase 3	0
GOTERM_BP_FAT	GO:0009144~purine nucleoside triphosphate metabolic process	0.0103041	QPX_transcriptome_v1_Contig_3211	Q40089	ATP synthase subunit delta', mitochondrial	1e-15
GOTERM_BP_FAT	GO:0009144~purine nucleoside triphosphate metabolic process	0.0103041	QPX_transcriptome_v1_Contig_1237	P92939	Calcium-transporting ATPase 1, endoplasmic reticulum-type	0
GOTERM_BP_FAT	GO:0009144~purine nucleoside triphosphate metabolic process	0.0103041	QPX_transcriptome_v1_Contig_858	Q9S7J8	Copper-transporting ATPase RAN1	2e-173
GOTERM_BP_FAT	GO:0009144~purine nucleoside triphosphate metabolic process	0.0103041	QPX_transcriptome_v1_Contig_5764	Q9LI83	Phospholipid-transporting ATPase 10	1e-113
GOTERM_BP_FAT	GO:0006084~acetyl-CoA metabolic process	0.0110414	QPX_transcriptome_v1_Contig_1973	P36683	Aconitate hydratase 2	0
GOTERM_BP_FAT	GO:0006084~acetyl-CoA metabolic process	0.0110414	QPX_transcriptome_v1_Contig_10225	Q13085	Acetyl-CoA carboxylase 1	2e-50
GOTERM_BP_FAT	GO:0006084~acetyl-CoA metabolic process	0.0110414	QPX_transcriptome_v1_Contig_1455	A1U1Q6	Malate synthase G	0
GOTERM_BP_FAT	GO:0006084~acetyl-CoA metabolic process	0.0110414	QPX_transcriptome_v1_Contig_1377	Q6ZDY8	Succinate dehydrogenase [ubiquinone] flavoprotein subunit, mitochondrial	0
GOTERM_BP_FAT	GO:0006084~acetyl-CoA metabolic process	0.0110414	QPX_transcriptome_v1_Contig_1068	P80480	Succinate dehydrogenase [ubiquinone] iron-sulfur subunit	2e-117
GOTERM_BP_FAT	GO:0006084~acetyl-CoA metabolic process	0.0110414	QPX_transcriptome_v1_Contig_82	O13755	Putative fumarate reductase	3e-75
GOTERM_BP_FAT	GO:0006084~acetyl-CoA metabolic process	0.0110414	QPX_transcriptome_v1_Contig_1335	O13755	Putative fumarate reductase	2e-130
GOTERM_BP_FAT	GO:0042493~response to drug	0.0143509	QPX_transcriptome_v1_Contig_1794	P07756	Carbamoyl-phosphate synthase [ammonia], mitochondrial	0
GOTERM_BP_FAT	GO:0042493~response to drug	0.0143509	QPX_transcriptome_v1_Contig_10225	Q13085	Acetyl-CoA carboxylase 1	2e-50
GOTERM_BP_FAT	GO:0042493~response to drug	0.0143509	QPX_transcriptome_v1_Contig_3261	P13929	Beta-enolase	2e-176
GOTERM_BP_FAT	GO:0042493~response to drug	0.0143509	QPX_transcriptome_v1_Contig_10711	Q66GI4	Pentatricopeptide repeat-containing protein At2g32230, mitochondrial	1e-10
GOTERM_BP_FAT	GO:0042493~response to drug	0.0143509	QPX_transcriptome_v1_Contig_919	P39692	Sulfite reductase [NADPH] flavoprotein component	4e-92
GOTERM_BP_FAT	GO:0042493~response to drug	0.0143509	QPX_transcriptome_v1_Contig_5623	P40939	Trifunctional enzyme subunit alpha, mitochondrial	1e-64
GOTERM_BP_FAT	GO:0042493~response to drug	0.0143509	QPX_transcriptome_v1_Contig_431	Q7PC88	ABC transporter G family member 31	0
GOTERM_BP_FAT	GO:0042493~response to drug	0.0143509	QPX_transcriptome_v1_Contig_8593	Q9Y817	Putative regulator of V-ATPase in vacuolar membrane protein 1	3e-19
GOTERM_BP_FAT	GO:0042493~response to drug	0.0143509	QPX_transcriptome_v1_Contig_173	Q9XIE2	ABC transporter G family member 36	0
GOTERM_BP_FAT	GO:0019344~cysteine biosynthetic process	0.0143578	QPX_transcriptome_v1_Contig_2184	Q9N0V7	Cystathionine beta-synthase	0
GOTERM_BP_FAT	GO:0019344~cysteine biosynthetic process	0.0143578	QPX_transcriptome_v1_Contig_1685	Q7D8W0	Putative cystathionine beta-synthase Rv1077	1e-69
GOTERM_BP_FAT	GO:0019344~cysteine biosynthetic process	0.0143578	QPX_transcriptome_v1_Contig_919	P39692	Sulfite reductase [NADPH] flavoprotein component	4e-92
GOTERM_BP_FAT	GO:0019344~cysteine biosynthetic process	0.0143578	QPX_transcriptome_v1_Contig_564	Q1K9C2	Sulfite reductase [NADPH] subunit beta	0
GOTERM_BP_FAT	GO:0006096~glycolysis	0.0152749	QPX_transcriptome_v1_Contig_1884	Q96UF2	Glyceraldehyde-3-phosphate dehydrogenase 2	1e-156
GOTERM_BP_FAT	GO:0006096~glycolysis	0.0152749	QPX_transcriptome_v1_Contig_1553	Q92IS3	Pyruvate dehydrogenase E1 component subunit alpha	4e-07
GOTERM_BP_FAT	GO:0006096~glycolysis	0.0152749	QPX_transcriptome_v1_Contig_3261	P13929	Beta-enolase	2e-176
GOTERM_BP_FAT	GO:0006096~glycolysis	0.0152749	QPX_transcriptome_v1_Contig_986	P08237	6-phosphofructokinase, muscle type	0
GOTERM_BP_FAT	GO:0006096~glycolysis	0.0152749	QPX_transcriptome_v1_Contig_2308	Q6CCU7	Glyceraldehyde-3-phosphate dehydrogenase	1e-156
GOTERM_BP_FAT	GO:0006096~glycolysis	0.0152749	QPX_transcriptome_v1_Contig_290	P48494	Triosephosphate isomerase, cytosolic	2e-78
GOTERM_BP_FAT	GO:0006096~glycolysis	0.0152749	QPX_transcriptome_v1_Contig_3871	P44429	Fructose-bisphosphate aldolase	9e-136
GOTERM_BP_FAT	GO:0006096~glycolysis	0.0152749	QPX_transcriptome_v1_Contig_5126	P52900	Pyruvate dehydrogenase E1 component subunit alpha, mitochondrial	4e-111
GOTERM_BP_FAT	GO:0009414~response to water deprivation	0.0161925	QPX_transcriptome_v1_Contig_3	P55737	Heat shock protein 90-2	0
GOTERM_BP_FAT	GO:0009414~response to water deprivation	0.0161925	QPX_transcriptome_v1_Contig_885	Q9STX5	Endoplasmin homolog	0
GOTERM_BP_FAT	GO:0009414~response to water deprivation	0.0161925	QPX_transcriptome_v1_Contig_2464	P20649	ATPase 1, plasma membrane-type	0
GOTERM_BP_FAT	GO:0009414~response to water deprivation	0.0161925	QPX_transcriptome_v1_Contig_1121	P31414	Pyrophosphate-energized vacuolar membrane proton pump 1	0
GOTERM_BP_FAT	GO:0009414~response to water deprivation	0.0161925	QPX_transcriptome_v1_Contig_310	P31414	Pyrophosphate-energized vacuolar membrane proton pump 1	0
GOTERM_BP_FAT	GO:0019343~cysteine biosynthetic process via cystathionine	0.0201801	QPX_transcriptome_v1_Contig_2184	Q9N0V7	Cystathionine beta-synthase	0
GOTERM_BP_FAT	GO:0019343~cysteine biosynthetic process via cystathionine	0.0201801	QPX_transcriptome_v1_Contig_1685	Q7D8W0	Putative cystathionine beta-synthase Rv1077	1e-69
GOTERM_BP_FAT	GO:0051258~protein polymerization	0.0243089	QPX_transcriptome_v1_Contig_9181	P06603	Tubulin alpha-1 chain	0
GOTERM_BP_FAT	GO:0051258~protein polymerization	0.0243089	QPX_transcriptome_v1_Contig_192	P11481	Tubulin alpha-1/alpha-2 chain	0
GOTERM_BP_FAT	GO:0051258~protein polymerization	0.0243089	QPX_transcriptome_v1_Contig_1838	Q9UJT0	Tubulin epsilon chain	7e-65
GOTERM_BP_FAT	GO:0051258~protein polymerization	0.0243089	QPX_transcriptome_v1_Contig_6575	P30883	Tubulin beta-4 chain	0
GOTERM_BP_FAT	GO:0009069~serine family amino acid metabolic process	0.024545	QPX_transcriptome_v1_Contig_2184	Q9N0V7	Cystathionine beta-synthase	0
GOTERM_BP_FAT	GO:0009069~serine family amino acid metabolic process	0.024545	QPX_transcriptome_v1_Contig_1685	Q7D8W0	Putative cystathionine beta-synthase Rv1077	1e-69
GOTERM_BP_FAT	GO:0009069~serine family amino acid metabolic process	0.024545	QPX_transcriptome_v1_Contig_919	P39692	Sulfite reductase [NADPH] flavoprotein component	4e-92
GOTERM_BP_FAT	GO:0009069~serine family amino acid metabolic process	0.024545	QPX_transcriptome_v1_Contig_1297	B2UNH4	Glycine dehydrogenase [decarboxylating]	0
GOTERM_BP_FAT	GO:0009069~serine family amino acid metabolic process	0.024545	QPX_transcriptome_v1_Contig_1640	Q9DBT9	Dimethylglycine dehydrogenase, mitochondrial	3e-94
GOTERM_BP_FAT	GO:0009069~serine family amino acid metabolic process	0.024545	QPX_transcriptome_v1_Contig_769	Q64380	Sarcosine dehydrogenase, mitochondrial	0
GOTERM_BP_FAT	GO:0009069~serine family amino acid metabolic process	0.024545	QPX_transcriptome_v1_Contig_564	Q1K9C2	Sulfite reductase [NADPH] subunit beta	0
GOTERM_BP_FAT	GO:0009070~serine family amino acid biosynthetic process	0.0274695	QPX_transcriptome_v1_Contig_2184	Q9N0V7	Cystathionine beta-synthase	0
GOTERM_BP_FAT	GO:0009070~serine family amino acid biosynthetic process	0.0274695	QPX_transcriptome_v1_Contig_1685	Q7D8W0	Putative cystathionine beta-synthase Rv1077	1e-69
GOTERM_BP_FAT	GO:0009070~serine family amino acid biosynthetic process	0.0274695	QPX_transcriptome_v1_Contig_919	P39692	Sulfite reductase [NADPH] flavoprotein component	4e-92
GOTERM_BP_FAT	GO:0009070~serine family amino acid biosynthetic process	0.0274695	QPX_transcriptome_v1_Contig_769	Q64380	Sarcosine dehydrogenase, mitochondrial	0
GOTERM_BP_FAT	GO:0009070~serine family amino acid biosynthetic process	0.0274695	QPX_transcriptome_v1_Contig_564	Q1K9C2	Sulfite reductase [NADPH] subunit beta	0
GOTERM_BP_FAT	GO:0009165~nucleotide biosynthetic process	0.0291869	QPX_transcriptome_v1_Contig_856	P19485	Adenylate cyclase 1	3e-32
GOTERM_BP_FAT	GO:0009165~nucleotide biosynthetic process	0.0291869	QPX_transcriptome_v1_Contig_5888	P08955	CAD protein	0
GOTERM_BP_FAT	GO:0009165~nucleotide biosynthetic process	0.0291869	QPX_transcriptome_v1_Contig_10179	Q7XPY2	Plasma membrane ATPase	8e-45
GOTERM_BP_FAT	GO:0009165~nucleotide biosynthetic process	0.0291869	QPX_transcriptome_v1_Contig_5764	Q9LI83	Phospholipid-transporting ATPase 10	1e-113
GOTERM_BP_FAT	GO:0009165~nucleotide biosynthetic process	0.0291869	QPX_transcriptome_v1_Contig_5956	P37367	Cation-transporting ATPase pma1	1e-27
GOTERM_BP_FAT	GO:0009165~nucleotide biosynthetic process	0.0291869	QPX_transcriptome_v1_Contig_883	P63688	Probable cation-transporting ATPase F	1e-115
GOTERM_BP_FAT	GO:0009165~nucleotide biosynthetic process	0.0291869	QPX_transcriptome_v1_Contig_1267	P63688	Probable cation-transporting ATPase F	4e-158
GOTERM_BP_FAT	GO:0009165~nucleotide biosynthetic process	0.0291869	QPX_transcriptome_v1_Contig_679	P63688	Probable cation-transporting ATPase F	3e-156
GOTERM_BP_FAT	GO:0009165~nucleotide biosynthetic process	0.0291869	QPX_transcriptome_v1_Contig_282	Q2VZN0	ATP synthase subunit alpha	0
GOTERM_BP_FAT	GO:0009165~nucleotide biosynthetic process	0.0291869	QPX_transcriptome_v1_Contig_1770	Q9LY32	ATPase 7, plasma membrane-type	1e-178
GOTERM_BP_FAT	GO:0009165~nucleotide biosynthetic process	0.0291869	QPX_transcriptome_v1_Contig_2464	P20649	ATPase 1, plasma membrane-type	0
GOTERM_BP_FAT	GO:0009165~nucleotide biosynthetic process	0.0291869	QPX_transcriptome_v1_Contig_1673	P07259	Protein URA2	0
GOTERM_BP_FAT	GO:0009165~nucleotide biosynthetic process	0.0291869	QPX_transcriptome_v1_Contig_9339	Q9SJ20	Ribonucleoside-diphosphate reductase large subunit	0
GOTERM_BP_FAT	GO:0009165~nucleotide biosynthetic process	0.0291869	QPX_transcriptome_v1_Contig_1732	Q9SH30	Putative copper-transporting ATPase 3	0
GOTERM_BP_FAT	GO:0009165~nucleotide biosynthetic process	0.0291869	QPX_transcriptome_v1_Contig_3211	Q40089	ATP synthase subunit delta', mitochondrial	1e-15
GOTERM_BP_FAT	GO:0009165~nucleotide biosynthetic process	0.0291869	QPX_transcriptome_v1_Contig_1237	P92939	Calcium-transporting ATPase 1, endoplasmic reticulum-type	0
GOTERM_BP_FAT	GO:0009165~nucleotide biosynthetic process	0.0291869	QPX_transcriptome_v1_Contig_858	Q9S7J8	Copper-transporting ATPase RAN1	2e-173
GOTERM_BP_FAT	GO:0009152~purine ribonucleotide biosynthetic process	0.0299082	QPX_transcriptome_v1_Contig_5956	P37367	Cation-transporting ATPase pma1	1e-27
GOTERM_BP_FAT	GO:0009152~purine ribonucleotide biosynthetic process	0.0299082	QPX_transcriptome_v1_Contig_883	P63688	Probable cation-transporting ATPase F	1e-115
GOTERM_BP_FAT	GO:0009152~purine ribonucleotide biosynthetic process	0.0299082	QPX_transcriptome_v1_Contig_1267	P63688	Probable cation-transporting ATPase F	4e-158
GOTERM_BP_FAT	GO:0009152~purine ribonucleotide biosynthetic process	0.0299082	QPX_transcriptome_v1_Contig_679	P63688	Probable cation-transporting ATPase F	3e-156
GOTERM_BP_FAT	GO:0009152~purine ribonucleotide biosynthetic process	0.0299082	QPX_transcriptome_v1_Contig_282	Q2VZN0	ATP synthase subunit alpha	0
GOTERM_BP_FAT	GO:0009152~purine ribonucleotide biosynthetic process	0.0299082	QPX_transcriptome_v1_Contig_1770	Q9LY32	ATPase 7, plasma membrane-type	1e-178
GOTERM_BP_FAT	GO:0009152~purine ribonucleotide biosynthetic process	0.0299082	QPX_transcriptome_v1_Contig_2464	P20649	ATPase 1, plasma membrane-type	0
GOTERM_BP_FAT	GO:0009152~purine ribonucleotide biosynthetic process	0.0299082	QPX_transcriptome_v1_Contig_10179	Q7XPY2	Plasma membrane ATPase	8e-45
GOTERM_BP_FAT	GO:0009152~purine ribonucleotide biosynthetic process	0.0299082	QPX_transcriptome_v1_Contig_1732	Q9SH30	Putative copper-transporting ATPase 3	0
GOTERM_BP_FAT	GO:0009152~purine ribonucleotide biosynthetic process	0.0299082	QPX_transcriptome_v1_Contig_3211	Q40089	ATP synthase subunit delta', mitochondrial	1e-15
GOTERM_BP_FAT	GO:0009152~purine ribonucleotide biosynthetic process	0.0299082	QPX_transcriptome_v1_Contig_1237	P92939	Calcium-transporting ATPase 1, endoplasmic reticulum-type	0
GOTERM_BP_FAT	GO:0009152~purine ribonucleotide biosynthetic process	0.0299082	QPX_transcriptome_v1_Contig_858	Q9S7J8	Copper-transporting ATPase RAN1	2e-173
GOTERM_BP_FAT	GO:0009152~purine ribonucleotide biosynthetic process	0.0299082	QPX_transcriptome_v1_Contig_5764	Q9LI83	Phospholipid-transporting ATPase 10	1e-113
GOTERM_BP_FAT	GO:0006164~purine nucleotide biosynthetic process	0.0310406	QPX_transcriptome_v1_Contig_856	P19485	Adenylate cyclase 1	3e-32
GOTERM_BP_FAT	GO:0006164~purine nucleotide biosynthetic process	0.0310406	QPX_transcriptome_v1_Contig_5956	P37367	Cation-transporting ATPase pma1	1e-27
GOTERM_BP_FAT	GO:0006164~purine nucleotide biosynthetic process	0.0310406	QPX_transcriptome_v1_Contig_883	P63688	Probable cation-transporting ATPase F	1e-115
GOTERM_BP_FAT	GO:0006164~purine nucleotide biosynthetic process	0.0310406	QPX_transcriptome_v1_Contig_1267	P63688	Probable cation-transporting ATPase F	4e-158
GOTERM_BP_FAT	GO:0006164~purine nucleotide biosynthetic process	0.0310406	QPX_transcriptome_v1_Contig_679	P63688	Probable cation-transporting ATPase F	3e-156
GOTERM_BP_FAT	GO:0006164~purine nucleotide biosynthetic process	0.0310406	QPX_transcriptome_v1_Contig_282	Q2VZN0	ATP synthase subunit alpha	0
GOTERM_BP_FAT	GO:0006164~purine nucleotide biosynthetic process	0.0310406	QPX_transcriptome_v1_Contig_1770	Q9LY32	ATPase 7, plasma membrane-type	1e-178
GOTERM_BP_FAT	GO:0006164~purine nucleotide biosynthetic process	0.0310406	QPX_transcriptome_v1_Contig_2464	P20649	ATPase 1, plasma membrane-type	0
GOTERM_BP_FAT	GO:0006164~purine nucleotide biosynthetic process	0.0310406	QPX_transcriptome_v1_Contig_10179	Q7XPY2	Plasma membrane ATPase	8e-45
GOTERM_BP_FAT	GO:0006164~purine nucleotide biosynthetic process	0.0310406	QPX_transcriptome_v1_Contig_1732	Q9SH30	Putative copper-transporting ATPase 3	0
GOTERM_BP_FAT	GO:0006164~purine nucleotide biosynthetic process	0.0310406	QPX_transcriptome_v1_Contig_3211	Q40089	ATP synthase subunit delta', mitochondrial	1e-15
GOTERM_BP_FAT	GO:0006164~purine nucleotide biosynthetic process	0.0310406	QPX_transcriptome_v1_Contig_1237	P92939	Calcium-transporting ATPase 1, endoplasmic reticulum-type	0
GOTERM_BP_FAT	GO:0006164~purine nucleotide biosynthetic process	0.0310406	QPX_transcriptome_v1_Contig_858	Q9S7J8	Copper-transporting ATPase RAN1	2e-173
GOTERM_BP_FAT	GO:0006164~purine nucleotide biosynthetic process	0.0310406	QPX_transcriptome_v1_Contig_5764	Q9LI83	Phospholipid-transporting ATPase 10	1e-113
GOTERM_BP_FAT	GO:0043603~cellular amide metabolic process	0.0312451	QPX_transcriptome_v1_Contig_1794	P07756	Carbamoyl-phosphate synthase [ammonia], mitochondrial	0
GOTERM_BP_FAT	GO:0043603~cellular amide metabolic process	0.0312451	QPX_transcriptome_v1_Contig_5353	Q9FKK7	Xylose isomerase	2e-167
GOTERM_BP_FAT	GO:0043603~cellular amide metabolic process	0.0312451	QPX_transcriptome_v1_Contig_4038	Q91293	Carbamoyl-phosphate synthase [ammonia], mitochondrial	0
GOTERM_BP_FAT	GO:0043603~cellular amide metabolic process	0.0312451	QPX_transcriptome_v1_Contig_4432	Q9EQS0	Transaldolase	3e-131
GOTERM_BP_FAT	GO:0043603~cellular amide metabolic process	0.0312451	QPX_transcriptome_v1_Contig_290	P48494	Triosephosphate isomerase, cytosolic	2e-78
GOTERM_BP_FAT	GO:0043603~cellular amide metabolic process	0.0312451	QPX_transcriptome_v1_Contig_4096	P23254	Transketolase 1	0
GOTERM_BP_FAT	GO:0043603~cellular amide metabolic process	0.0312451	QPX_transcriptome_v1_Contig_615	P80859	6-phosphogluconate dehydrogenase, decarboxylating 2	3e-155
GOTERM_BP_FAT	GO:0042060~wound healing	0.0323616	QPX_transcriptome_v1_Contig_11039	P10587	Myosin-11	2e-12
GOTERM_BP_FAT	GO:0042060~wound healing	0.0323616	QPX_transcriptome_v1_Contig_3261	P13929	Beta-enolase	2e-176
GOTERM_BP_FAT	GO:0042060~wound healing	0.0323616	QPX_transcriptome_v1_Contig_3958	Q2LD49	Zinc metalloproteinase-disintegrin TSV-DM	9e-10
GOTERM_BP_FAT	GO:0042060~wound healing	0.0323616	QPX_transcriptome_v1_Contig_1521	P83912	Zinc metalloproteinase-disintegrin jerdonitin	2e-17
GOTERM_BP_FAT	GO:0042060~wound healing	0.0323616	QPX_transcriptome_v1_Contig_8466	P16296	Coagulation factor IX	9e-33
GOTERM_BP_FAT	GO:0006099~tricarboxylic acid cycle	0.0323616	QPX_transcriptome_v1_Contig_1973	P36683	Aconitate hydratase 2	0
GOTERM_BP_FAT	GO:0006099~tricarboxylic acid cycle	0.0323616	QPX_transcriptome_v1_Contig_1455	A1U1Q6	Malate synthase G	0
GOTERM_BP_FAT	GO:0006099~tricarboxylic acid cycle	0.0323616	QPX_transcriptome_v1_Contig_1377	Q6ZDY8	Succinate dehydrogenase [ubiquinone] flavoprotein subunit, mitochondrial	0
GOTERM_BP_FAT	GO:0006099~tricarboxylic acid cycle	0.0323616	QPX_transcriptome_v1_Contig_1068	P80480	Succinate dehydrogenase [ubiquinone] iron-sulfur subunit	2e-117
GOTERM_BP_FAT	GO:0006099~tricarboxylic acid cycle	0.0323616	QPX_transcriptome_v1_Contig_82	O13755	Putative fumarate reductase	3e-75
GOTERM_BP_FAT	GO:0006099~tricarboxylic acid cycle	0.0323616	QPX_transcriptome_v1_Contig_1335	O13755	Putative fumarate reductase	2e-130
GOTERM_BP_FAT	GO:0046356~acetyl-CoA catabolic process	0.0323616	QPX_transcriptome_v1_Contig_1973	P36683	Aconitate hydratase 2	0
GOTERM_BP_FAT	GO:0046356~acetyl-CoA catabolic process	0.0323616	QPX_transcriptome_v1_Contig_1455	A1U1Q6	Malate synthase G	0
GOTERM_BP_FAT	GO:0046356~acetyl-CoA catabolic process	0.0323616	QPX_transcriptome_v1_Contig_1377	Q6ZDY8	Succinate dehydrogenase [ubiquinone] flavoprotein subunit, mitochondrial	0
GOTERM_BP_FAT	GO:0046356~acetyl-CoA catabolic process	0.0323616	QPX_transcriptome_v1_Contig_1068	P80480	Succinate dehydrogenase [ubiquinone] iron-sulfur subunit	2e-117
GOTERM_BP_FAT	GO:0046356~acetyl-CoA catabolic process	0.0323616	QPX_transcriptome_v1_Contig_82	O13755	Putative fumarate reductase	3e-75
GOTERM_BP_FAT	GO:0046356~acetyl-CoA catabolic process	0.0323616	QPX_transcriptome_v1_Contig_1335	O13755	Putative fumarate reductase	2e-130
GOTERM_BP_FAT	GO:0009109~coenzyme catabolic process	0.0403619	QPX_transcriptome_v1_Contig_1973	P36683	Aconitate hydratase 2	0
GOTERM_BP_FAT	GO:0009109~coenzyme catabolic process	0.0403619	QPX_transcriptome_v1_Contig_1455	A1U1Q6	Malate synthase G	0
GOTERM_BP_FAT	GO:0009109~coenzyme catabolic process	0.0403619	QPX_transcriptome_v1_Contig_1377	Q6ZDY8	Succinate dehydrogenase [ubiquinone] flavoprotein subunit, mitochondrial	0
GOTERM_BP_FAT	GO:0009109~coenzyme catabolic process	0.0403619	QPX_transcriptome_v1_Contig_1068	P80480	Succinate dehydrogenase [ubiquinone] iron-sulfur subunit	2e-117
GOTERM_BP_FAT	GO:0009109~coenzyme catabolic process	0.0403619	QPX_transcriptome_v1_Contig_82	O13755	Putative fumarate reductase	3e-75
GOTERM_BP_FAT	GO:0009109~coenzyme catabolic process	0.0403619	QPX_transcriptome_v1_Contig_1335	O13755	Putative fumarate reductase	2e-130
GOTERM_BP_FAT	GO:0010035~response to inorganic substance	0.0429672	QPX_transcriptome_v1_Contig_885	Q9STX5	Endoplasmin homolog	0
GOTERM_BP_FAT	GO:0010035~response to inorganic substance	0.0429672	QPX_transcriptome_v1_Contig_224	Q1RJD8	Thioredoxin reductase	2e-62
GOTERM_BP_FAT	GO:0010035~response to inorganic substance	0.0429672	QPX_transcriptome_v1_Contig_417	Q8QZR1	Tyrosine aminotransferase	4e-111
GOTERM_BP_FAT	GO:0010035~response to inorganic substance	0.0429672	QPX_transcriptome_v1_Contig_172	P42730	Chaperone protein ClpB1	0
GOTERM_BP_FAT	GO:0010035~response to inorganic substance	0.0429672	QPX_transcriptome_v1_Contig_9339	Q9SJ20	Ribonucleoside-diphosphate reductase large subunit	0
GOTERM_BP_FAT	GO:0010035~response to inorganic substance	0.0429672	QPX_transcriptome_v1_Contig_1732	Q9SH30	Putative copper-transporting ATPase 3	0
GOTERM_BP_FAT	GO:0010035~response to inorganic substance	0.0429672	QPX_transcriptome_v1_Contig_339	Q9M5K3	Dihydrolipoyl dehydrogenase 1, mitochondrial	9e-174
GOTERM_BP_FAT	GO:0010035~response to inorganic substance	0.0429672	QPX_transcriptome_v1_Contig_1237	P92939	Calcium-transporting ATPase 1, endoplasmic reticulum-type	0
GOTERM_BP_FAT	GO:0010035~response to inorganic substance	0.0429672	QPX_transcriptome_v1_Contig_8593	Q9Y817	Putative regulator of V-ATPase in vacuolar membrane protein 1	3e-19
GOTERM_BP_FAT	GO:0010035~response to inorganic substance	0.0429672	QPX_transcriptome_v1_Contig_114	Q39172	NADP-dependent alkenal double bond reductase P1	1e-48
GOTERM_BP_FAT	GO:0009150~purine ribonucleotide metabolic process	0.0440745	QPX_transcriptome_v1_Contig_5956	P37367	Cation-transporting ATPase pma1	1e-27
GOTERM_BP_FAT	GO:0009150~purine ribonucleotide metabolic process	0.0440745	QPX_transcriptome_v1_Contig_883	P63688	Probable cation-transporting ATPase F	1e-115
GOTERM_BP_FAT	GO:0009150~purine ribonucleotide metabolic process	0.0440745	QPX_transcriptome_v1_Contig_1267	P63688	Probable cation-transporting ATPase F	4e-158
GOTERM_BP_FAT	GO:0009150~purine ribonucleotide metabolic process	0.0440745	QPX_transcriptome_v1_Contig_679	P63688	Probable cation-transporting ATPase F	3e-156
GOTERM_BP_FAT	GO:0009150~purine ribonucleotide metabolic process	0.0440745	QPX_transcriptome_v1_Contig_282	Q2VZN0	ATP synthase subunit alpha	0
GOTERM_BP_FAT	GO:0009150~purine ribonucleotide metabolic process	0.0440745	QPX_transcriptome_v1_Contig_1770	Q9LY32	ATPase 7, plasma membrane-type	1e-178
GOTERM_BP_FAT	GO:0009150~purine ribonucleotide metabolic process	0.0440745	QPX_transcriptome_v1_Contig_2464	P20649	ATPase 1, plasma membrane-type	0
GOTERM_BP_FAT	GO:0009150~purine ribonucleotide metabolic process	0.0440745	QPX_transcriptome_v1_Contig_10179	Q7XPY2	Plasma membrane ATPase	8e-45
GOTERM_BP_FAT	GO:0009150~purine ribonucleotide metabolic process	0.0440745	QPX_transcriptome_v1_Contig_1732	Q9SH30	Putative copper-transporting ATPase 3	0
GOTERM_BP_FAT	GO:0009150~purine ribonucleotide metabolic process	0.0440745	QPX_transcriptome_v1_Contig_3211	Q40089	ATP synthase subunit delta', mitochondrial	1e-15
GOTERM_BP_FAT	GO:0009150~purine ribonucleotide metabolic process	0.0440745	QPX_transcriptome_v1_Contig_1237	P92939	Calcium-transporting ATPase 1, endoplasmic reticulum-type	0
GOTERM_BP_FAT	GO:0009150~purine ribonucleotide metabolic process	0.0440745	QPX_transcriptome_v1_Contig_858	Q9S7J8	Copper-transporting ATPase RAN1	2e-173
GOTERM_BP_FAT	GO:0009150~purine ribonucleotide metabolic process	0.0440745	QPX_transcriptome_v1_Contig_5764	Q9LI83	Phospholipid-transporting ATPase 10	1e-113
GOTERM_BP_FAT	GO:0009415~response to water	0.0459008	QPX_transcriptome_v1_Contig_3	P55737	Heat shock protein 90-2	0
GOTERM_BP_FAT	GO:0009415~response to water	0.0459008	QPX_transcriptome_v1_Contig_885	Q9STX5	Endoplasmin homolog	0
GOTERM_BP_FAT	GO:0009415~response to water	0.0459008	QPX_transcriptome_v1_Contig_2464	P20649	ATPase 1, plasma membrane-type	0
GOTERM_BP_FAT	GO:0009415~response to water	0.0459008	QPX_transcriptome_v1_Contig_1121	P31414	Pyrophosphate-energized vacuolar membrane proton pump 1	0
GOTERM_BP_FAT	GO:0009415~response to water	0.0459008	QPX_transcriptome_v1_Contig_310	P31414	Pyrophosphate-energized vacuolar membrane proton pump 1	0
GOTERM_BP_FAT	GO:0000041~transition metal ion transport	0.0466318	QPX_transcriptome_v1_Contig_787	Q3AU90	Zinc transporter ZupT	3e-39
GOTERM_BP_FAT	GO:0000041~transition metal ion transport	0.0466318	QPX_transcriptome_v1_Contig_1732	Q9SH30	Putative copper-transporting ATPase 3	0
GOTERM_BP_FAT	GO:0000041~transition metal ion transport	0.0466318	QPX_transcriptome_v1_Contig_10105	P42577	Soma ferritin	1e-63
GOTERM_BP_FAT	GO:0000041~transition metal ion transport	0.0466318	QPX_transcriptome_v1_Contig_1237	P92939	Calcium-transporting ATPase 1, endoplasmic reticulum-type	0
GOTERM_BP_FAT	GO:0000041~transition metal ion transport	0.0466318	QPX_transcriptome_v1_Contig_858	Q9S7J8	Copper-transporting ATPase RAN1	2e-173
GOTERM_BP_FAT	GO:0000041~transition metal ion transport	0.0466318	QPX_transcriptome_v1_Contig_173	Q9XIE2	ABC transporter G family member 36	0
GOTERM_BP_FAT	GO:0006811~ion transport	0.0492612	QPX_transcriptome_v1_Contig_3533	Q5FWH7	Zinc transporter ZIP12	3e-23
GOTERM_BP_FAT	GO:0006811~ion transport	0.0492612	QPX_transcriptome_v1_Contig_787	Q3AU90	Zinc transporter ZupT	3e-39
GOTERM_BP_FAT	GO:0006811~ion transport	0.0492612	QPX_transcriptome_v1_Contig_2977	Q9FVN0	Ammonium transporter 1 member 3	9e-86
GOTERM_BP_FAT	GO:0006811~ion transport	0.0492612	QPX_transcriptome_v1_Contig_10179	Q7XPY2	Plasma membrane ATPase	8e-45
GOTERM_BP_FAT	GO:0006811~ion transport	0.0492612	QPX_transcriptome_v1_Contig_1674	P21616	Pyrophosphate-energized vacuolar membrane proton pump	0
GOTERM_BP_FAT	GO:0006811~ion transport	0.0492612	QPX_transcriptome_v1_Contig_4204	Q9NZM6	Polycystic kidney disease 2-like 2 protein	2e-45
GOTERM_BP_FAT	GO:0006811~ion transport	0.0492612	QPX_transcriptome_v1_Contig_173	Q9XIE2	ABC transporter G family member 36	0
GOTERM_BP_FAT	GO:0006811~ion transport	0.0492612	QPX_transcriptome_v1_Contig_5956	P37367	Cation-transporting ATPase pma1	1e-27
GOTERM_BP_FAT	GO:0006811~ion transport	0.0492612	QPX_transcriptome_v1_Contig_883	P63688	Probable cation-transporting ATPase F	1e-115
GOTERM_BP_FAT	GO:0006811~ion transport	0.0492612	QPX_transcriptome_v1_Contig_1267	P63688	Probable cation-transporting ATPase F	4e-158
GOTERM_BP_FAT	GO:0006811~ion transport	0.0492612	QPX_transcriptome_v1_Contig_679	P63688	Probable cation-transporting ATPase F	3e-156
GOTERM_BP_FAT	GO:0006811~ion transport	0.0492612	QPX_transcriptome_v1_Contig_1005	P55016	Solute carrier family 12 member 1	5e-159
GOTERM_BP_FAT	GO:0006811~ion transport	0.0492612	QPX_transcriptome_v1_Contig_282	Q2VZN0	ATP synthase subunit alpha	0
GOTERM_BP_FAT	GO:0006811~ion transport	0.0492612	QPX_transcriptome_v1_Contig_1770	Q9LY32	ATPase 7, plasma membrane-type	1e-178
GOTERM_BP_FAT	GO:0006811~ion transport	0.0492612	QPX_transcriptome_v1_Contig_2464	P20649	ATPase 1, plasma membrane-type	0
GOTERM_BP_FAT	GO:0006811~ion transport	0.0492612	QPX_transcriptome_v1_Contig_1121	P31414	Pyrophosphate-energized vacuolar membrane proton pump 1	0
GOTERM_BP_FAT	GO:0006811~ion transport	0.0492612	QPX_transcriptome_v1_Contig_310	P31414	Pyrophosphate-energized vacuolar membrane proton pump 1	0
GOTERM_BP_FAT	GO:0006811~ion transport	0.0492612	QPX_transcriptome_v1_Contig_45	Q56ZN6	Pyrophosphate-energized membrane proton pump 2	0
GOTERM_BP_FAT	GO:0006811~ion transport	0.0492612	QPX_transcriptome_v1_Contig_1732	Q9SH30	Putative copper-transporting ATPase 3	0
GOTERM_BP_FAT	GO:0006811~ion transport	0.0492612	QPX_transcriptome_v1_Contig_10105	P42577	Soma ferritin	1e-63
GOTERM_BP_FAT	GO:0006811~ion transport	0.0492612	QPX_transcriptome_v1_Contig_3211	Q40089	ATP synthase subunit delta', mitochondrial	1e-15
GOTERM_BP_FAT	GO:0006811~ion transport	0.0492612	QPX_transcriptome_v1_Contig_1237	P92939	Calcium-transporting ATPase 1, endoplasmic reticulum-type	0
GOTERM_BP_FAT	GO:0006811~ion transport	0.0492612	QPX_transcriptome_v1_Contig_858	Q9S7J8	Copper-transporting ATPase RAN1	2e-173
GOTERM_BP_FAT	GO:0006811~ion transport	0.0492612	QPX_transcriptome_v1_Contig_6061	P01103	Transcriptional activator Myb	5e-46
GOTERM_BP_FAT	GO:0006534~cysteine metabolic process	0.0493836	QPX_transcriptome_v1_Contig_2184	Q9N0V7	Cystathionine beta-synthase	0
GOTERM_BP_FAT	GO:0006534~cysteine metabolic process	0.0493836	QPX_transcriptome_v1_Contig_1685	Q7D8W0	Putative cystathionine beta-synthase Rv1077	1e-69
GOTERM_BP_FAT	GO:0006534~cysteine metabolic process	0.0493836	QPX_transcriptome_v1_Contig_919	P39692	Sulfite reductase [NADPH] flavoprotein component	4e-92
GOTERM_BP_FAT	GO:0006534~cysteine metabolic process	0.0493836	QPX_transcriptome_v1_Contig_564	Q1K9C2	Sulfite reductase [NADPH] subunit beta	0
GOTERM_BP_FAT	GO:0051187~cofactor catabolic process	0.0493836	QPX_transcriptome_v1_Contig_1973	P36683	Aconitate hydratase 2	0
GOTERM_BP_FAT	GO:0051187~cofactor catabolic process	0.0493836	QPX_transcriptome_v1_Contig_1455	A1U1Q6	Malate synthase G	0
GOTERM_BP_FAT	GO:0051187~cofactor catabolic process	0.0493836	QPX_transcriptome_v1_Contig_1377	Q6ZDY8	Succinate dehydrogenase [ubiquinone] flavoprotein subunit, mitochondrial	0
GOTERM_BP_FAT	GO:0051187~cofactor catabolic process	0.0493836	QPX_transcriptome_v1_Contig_1068	P80480	Succinate dehydrogenase [ubiquinone] iron-sulfur subunit	2e-117
GOTERM_BP_FAT	GO:0051187~cofactor catabolic process	0.0493836	QPX_transcriptome_v1_Contig_82	O13755	Putative fumarate reductase	3e-75
GOTERM_BP_FAT	GO:0051187~cofactor catabolic process	0.0493836	QPX_transcriptome_v1_Contig_1335	O13755	Putative fumarate reductase	2e-130
